# Supplementary material for: Research on the construction of growth models for dominant tree species in the Manas River Basin, Xinjiang
Source: PeerJ. 2026 Feb 16;14:e20650. doi: 10.7717/peerj.20650 (PMC12919323; doi:10.7717/peerj.20650)
Supplement: Supplemental Information 3 — The 2011 Xinjiang Forest Resource Inventory data used in this study for the Manas River Basin in Xinjiang, including basic information such as forest type, forest age, and tree height, along with additional factors (e.g., precipitation) incorporated subsequently to assess their influence on forest growth. This dataset contains fundamental forest characteristics including stand age, tree height, and diameter at breast height (DBH), playing a crucial role in sustainable forest management studies. [file peerj-14-20650-s003.xlsx]

## Sheet: Sheet1
FID	dominant tree species	forest type	forest age	Diameter at Breast Height	average tree height	Digital Elevation Model（DEM）	Maximum of Daily Maximum Temperatures（TXx）	Minimum of Daily Maximum Temperatures（TXn）	Maximum of Daily Minimum Temperatures (TNx)	Minimum of Daily Minimum Temperatures (TNn)	Diurnal Temperature Range (DTR)	Summer Days (SU)	Ice Days（ID）	Warm Spell Duration Index (WSDI)	Cold Spell Duration Index (CSDI)	precipitation（P）	Vapor Pressure Deficit (VPD)
118	263	13	15	8	6	270	39.7802	-26.354	25.0672	-37.8965	11.8705	143	102	9	15	159.3	98.25
120	516	13	25	16	5	275	39.7802	-26.354	25.0672	-37.8965	11.8705	143	102	9	15	160.4	96.75
135	330	13	35	40	11	283	39.7802	-26.354	25.0672	-37.8965	11.8705	143	102	9	15	170.3	97
137	516	16	14	6	4	280	39.7802	-26.354	25.0672	-37.8965	11.8705	143	102	9	15	173.1	95.6667
138	263	13	21	12	8	280	39.3818	-26.4083	25.1687	-37.9248	11.9291	142	103	8	15	175.2	100.083
140	263	16	20	14	13	282	39.7802	-26.354	25.0672	-37.8965	11.8705	143	102	9	15	167.8	94.9167
143	310	16	23	18	17	286	39.7802	-26.354	25.0672	-37.8965	11.8705	143	102	9	15	170	94.9167
150	330	13	20	26	8	290	39.7802	-26.354	25.0672	-37.8965	11.8705	143	102	9	15	168.3	94.8333
154	516	13	20	14	5	284	39.3818	-26.4083	25.1687	-37.9248	11.9291	142	103	8	15	174.2	97.3333
157	263	16	25	16	10	285	39.7802	-26.354	25.0672	-37.8965	11.8705	143	102	9	15	171.5	95.1667
158	330	13	9	6	3	289	39.7802	-26.354	25.0672	-37.8965	11.8705	143	102	9	15	174.3	94.8333
159	516	13	17	10	5	289	39.3818	-26.4083	25.1687	-37.9248	11.9291	142	103	8	15	174.6	95.8333
162	330	16	13	10	4	287	39.7802	-26.354	25.0672	-37.8965	11.8705	143	102	9	15	171.2	94.5833
163	263	13	11	6	6	286	39.3818	-26.4083	25.1687	-37.9248	11.9291	142	103	8	15	175	94.1667
165	516	13	17	10	5	285	39.3818	-26.4083	25.1687	-37.9248	11.9291	142	103	8	15	174.6	94.5
166	263	13	25	16	12	292	39.7802	-26.354	25.0672	-37.8965	11.8705	143	102	9	15	167	94.8333
167	330	13	18	22	8	290	39.7802	-26.354	25.0672	-37.8965	11.8705	143	102	9	15	170.3	95.25
169	330	16	20	14	10	293	39.7802	-26.354	25.0672	-37.8965	11.8705	143	102	9	15	170.5	94.8333
171	330	16	20	26	7	291	39.7802	-26.354	25.0672	-37.8965	11.8705	143	102	9	15	170.8	95.25
172	516	13	25	18	6	291	39.3818	-26.4083	25.1687	-37.9248	11.9291	142	103	8	15	175.2	94.5
173	516	13	13	6	5	289	39.3818	-26.4083	25.1687	-37.9248	11.9291	142	103	8	15	172.1	94.1667
174	516	13	17	10	5	289	39.3818	-26.4083	25.1687	-37.9248	11.9291	142	103	8	15	175.1	94.1667
179	516	13	13	6	3	290	39.3818	-26.4083	25.1687	-37.9248	11.9291	142	103	8	15	173.8	94.5
181	330	16	20	26	9	300	39.7802	-26.354	25.0672	-37.8965	11.8705	143	102	9	15	172.9	94.4167
182	263	16	35	28	12	307	39.1945	-24.9683	25.1484	-35.6783	11.5429	139	102	8	15	171.8	94.25
183	601	13	15	8	5	291	39.1515	-24.8134	25.0565	-35.7499	11.7188	138	101	6	15	168.5	92.75
186	330	13	12	10	5	305	39.1945	-24.9683	25.1484	-35.6783	11.5429	139	102	8	15	173	94.4167
191	263	13	27	20	12	298	39.1515	-24.8134	25.0565	-35.7499	11.7188	138	101	6	15	171.7	92.6667
198	330	13	20	14	12	308	39.1945	-24.9683	25.1484	-35.6783	11.5429	139	102	8	15	169.8	92.75
200	516	13	13	6	5	311	39.1515	-24.8134	25.0565	-35.7499	11.7188	138	101	6	15	171.4	93
202	330	16	18	22	10	322	39.1945	-24.9683	25.1484	-35.6783	11.5429	139	102	8	15	173.3	93.5
203	330	16	18	22	10	321	39.1945	-24.9683	25.1484	-35.6783	11.5429	139	102	8	15	173.3	93.5
204	516	13	13	6	5	312	39.1515	-24.8134	25.0565	-35.7499	11.7188	138	101	6	15	171.2	93
212	516	13	20	14	7	330	39.1945	-24.9683	25.1484	-35.6783	11.5429	139	102	8	15	173.2	93.1667
221	516	16	13	6	12	353	39.9246	-25.1187	25.5236	-35.1798	11.1348	140	101	11	15	173.1	97.0833
224	263	16	27	30	12	371	39.9246	-25.1187	25.5236	-35.1798	11.1348	140	101	11	15	184.2	95.9167
226	263	16	20	20	8	374	39.9246	-25.1187	25.5236	-35.1798	11.1348	140	101	11	15	180.4	95.9167
227	330	16	18	20	8	374	39.9246	-25.1187	25.5236	-35.1798	11.1348	140	101	11	15	180.4	95.9167
266	263	13	21	10	9	400	39.1945	-24.9683	25.1484	-35.6783	11.5429	139	102	8	15	181.1	93.25
274	263	16	21	18	8	394	39.1945	-24.9683	25.1484	-35.6783	11.5429	139	102	8	15	174.4	92.6667
295	263	13	16	6	6	407	38.6482	-24.4004	25.4715	-34.0604	10.9505	137	102	6	15	172.8	91.4167
304	263	13	15	6	4	425	38.8155	-24.4803	25.6658	-33.7237	10.6847	136	102	7	15	170.3	93.5833
325	263	13	13	6	5	448	39.2002	-24.3814	25.9438	-33.1758	10.5019	136	101	9	15	184.7	101.25
338	263	13	15	6	4	452	38.8155	-24.4803	25.6658	-33.7237	10.6847	136	102	7	15	181.8	96.8333
339	263	13	13	6	4	448	38.8155	-24.4803	25.6658	-33.7237	10.6847	136	102	7	15	183.7	96.8333
348	263	13	17	6	5	409	38.8155	-24.4803	25.6658	-33.7237	10.6847	136	102	7	15	173.9	94.8333
354	263	13	17	6	5	414	38.8155	-24.4803	25.6658	-33.7237	10.6847	136	102	7	15	173.9	94.8333
360	263	13	11	6	7	428	38.8155	-24.4803	25.6658	-33.7237	10.6847	136	102	7	15	178.8	94.8333
367	263	16	15	6	4	479	39.2002	-24.3814	25.9438	-33.1758	10.5019	136	101	9	15	190.4	104
369	263	13	20	14	7	424	38.6482	-24.4004	25.4715	-34.0604	10.9505	137	102	6	15	166.9	91.4167
405	263	13	18	8	5	454	38.8155	-24.4803	25.6658	-33.7237	10.6847	136	102	7	15	180.5	99.9167
430	263	13	30	24	9	457	38.8155	-24.4803	25.6658	-33.7237	10.6847	136	102	7	15	174.9	103
447	263	13	11	6	7	459	38.6482	-24.4004	25.4715	-34.0604	10.9505	137	102	6	15	182.8	94.4167
462	516	16	13	6	2	520	38.8155	-24.4803	25.6658	-33.7237	10.6847	136	102	7	15	175.4	99.25
465	330	13	30	28	8	433	38.6482	-24.4004	25.4715	-34.0604	10.9505	137	102	6	15	166.9	92.5833
537	263	13	13	6	6	958	38.5943	-24.3812	26.019	-32.532	9.98892	134	102	6	15	215.1	83.3333
545	263	13	13	6	6	961	38.5943	-24.3812	26.019	-32.532	9.98892	134	102	6	15	211.7	83.8333
548	516	16	15	12	11	945	38.5943	-24.3812	26.019	-32.532	9.98892	134	102	6	15	205.7	83.8333
569	263	16	20	10	11	869	38.6089	-24.3569	25.7464	-33.1355	10.385	134	102	6	15	196.2	88.5
571	263	16	20	10	11	869	38.6089	-24.3569	25.7464	-33.1355	10.385	134	102	6	15	196.2	88.5
583	263	16	30	26	10	791	38.6089	-24.3569	25.7464	-33.1355	10.385	134	102	6	15	194	88.25
613	263	13	20	10	10	959	38.6089	-24.3569	25.7464	-33.1355	10.385	134	102	6	15	212.6	82.1667
618	263	16	13	6	6	974	38.6089	-24.3569	25.7464	-33.1355	10.385	134	102	6	15	218	82.1667
619	263	16	13	6	6	982	38.6089	-24.3569	25.7464	-33.1355	10.385	134	102	6	15	218.1	82.1667
620	263	13	17	8	6	1214	38.793	-24.3254	26.0373	-32.519	10.094	134	102	7	16	240.6	73.8333
621	263	16	17	6	10	1101	38.5943	-24.3812	26.019	-32.532	9.98892	134	102	6	15	225.5	76.6667
623	263	13	13	6	7	1236	38.793	-24.3254	26.0373	-32.519	10.094	134	102	7	16	241.2	73.8333
627	263	16	17	12	7	1272	38.793	-24.3254	26.0373	-32.519	10.094	134	102	7	16	250.3	68.4167
628	263	16	17	12	7	1266	38.793	-24.3254	26.0373	-32.519	10.094	134	102	7	16	250.3	68.4167
629	263	16	17	12	7	1304	38.793	-24.3254	26.0373	-32.519	10.094	134	102	7	16	260.2	61.8333
630	263	13	15	8	6	1292	38.793	-24.3254	26.0373	-32.519	10.094	134	102	7	16	260.2	68.4167
639	263	16	15	6	9	1152	38.5943	-24.3812	26.019	-32.532	9.98892	134	102	6	15	239.7	74.75
650	263	13	13	8	6	292	39.3818	-26.4083	25.1687	-37.9248	11.9291	142	103	8	15	164.7	110.25
652	516	13	13	8	5	289	39.3818	-26.4083	25.1687	-37.9248	11.9291	142	103	8	15	165.9	112.917
653	263	13	17	8	6	293	39.3219	-26.3659	25.2277	-37.901	11.9618	142	103	7	15	166.2	105.667
654	263	13	13	8	6	294	39.3219	-26.3659	25.2277	-37.901	11.9618	142	103	7	15	165.3	105.667
655	516	13	17	8	6	293	39.3219	-26.3659	25.2277	-37.901	11.9618	142	103	7	15	164.9	105.667
657	516	13	13	8	6	292	39.3818	-26.4083	25.1687	-37.9248	11.9291	142	103	8	15	165.8	110.25
662	263	13	17	8	7	299	39.3219	-26.3659	25.2277	-37.901	11.9618	142	103	7	15	164.1	101.833
665	516	13	20	12	8	302	39.3219	-26.3659	25.2277	-37.901	11.9618	142	103	7	15	166.2	101.833
682	516	13	18	14	5	305	39.3219	-26.3659	25.2277	-37.901	11.9618	142	103	7	15	168.5	100.917
691	516	13	18	14	5	313	39.2725	-24.7665	25.0986	-35.8893	11.811	138	102	6	15	172.3	95.1667
692	516	13	18	14	6	321	39.2725	-24.7665	25.0986	-35.8893	11.811	138	102	6	15	178	95.1667
702	263	13	20	16	10	318	39.2725	-24.7665	25.0986	-35.8893	11.811	138	102	6	15	176.3	95.4167
725	263	13	17	8	8	349	39.2725	-24.7665	25.0986	-35.8893	11.811	138	102	6	15	171.7	91.5
726	516	13	13	8	6	351	39.2725	-24.7665	25.0986	-35.8893	11.811	138	102	6	15	174.5	92.3333
730	516	13	15	8	6	357	39.2272	-24.2718	25.1822	-35.1094	11.6608	136	102	7	15	166.1	91.0833
767	263	13	15	8	8	421	39.2272	-24.2718	25.1822	-35.1094	11.6608	136	102	7	15	170.2	91.75
782	263	13	13	6	5	417	39.2272	-24.2718	25.1822	-35.1094	11.6608	136	102	7	15	164.6	90.5
784	263	13	24	20	13	405	39.2272	-24.2718	25.1822	-35.1094	11.6608	136	102	7	15	162.2	91
793	529	13	13	10	7	411	39.2272	-24.2718	25.1822	-35.1094	11.6608	136	102	7	15	165.9	91
794	516	13	14	6	6	409	39.2272	-24.2718	25.1822	-35.1094	11.6608	136	102	7	15	169.7	91
798	263	13	17	14	12	422	39.2272	-24.2718	25.1822	-35.1094	11.6608	136	102	7	15	167.4	91
800	515	13	15	12	6	435	39.2272	-24.2718	25.1822	-35.1094	11.6608	136	102	7	15	171.3	93.5833
811	515	13	17	14	9	455	39.2272	-24.2718	25.1822	-35.1094	11.6608	136	102	7	15	169.2	93.5833
812	263	13	20	16	9	454	39.2272	-24.2718	25.1822	-35.1094	11.6608	136	102	7	15	169	93.5833
816	330	13	15	6	6	527	39.2272	-24.2718	25.1822	-35.1094	11.6608	136	102	7	15	183	92.0833
825	330	13	15	6	5	538	39.2272	-24.2718	25.1822	-35.1094	11.6608	136	102	7	15	187.5	92.0833
840	263	13	26	22	13	444	39.5254	-24.3854	26.0422	-34.508	11.3466	135	103	8	15	173.8	90.5
844	263	13	18	14	8	491	39.2272	-24.2718	25.1822	-35.1094	11.6608	136	102	7	15	174	93.75
847	263	13	18	14	10	483	39.2272	-24.2718	25.1822	-35.1094	11.6608	136	102	7	15	174.6	93.75
893	263	13	15	12	6	565	39.2272	-24.2718	25.1822	-35.1094	11.6608	136	102	7	15	177.7	91.5
896	263	13	15	12	6	569	39.2272	-24.2718	25.1822	-35.1094	11.6608	136	102	7	15	176.4	91.5
902	516	13	11	6	2	583	39.2272	-24.2718	25.1822	-35.1094	11.6608	136	102	7	15	181.1	92.6667
963	263	13	18	14	5	1031	38.6883	-24.1893	25.2281	-34.072	11.1573	130	103	7	15	202.3	81.4167
967	263	13	17	8	7	808	38.6866	-24.2904	25.3723	-33.8814	10.918	133	102	6	15	194.9	83.8333
968	263	13	15	6	8	826	38.6866	-24.2904	25.3723	-33.8814	10.918	133	102	6	15	205.9	83.8333
972	263	13	15	6	7	828	38.6866	-24.2904	25.3723	-33.8814	10.918	133	102	6	15	204.9	83.8333
1002	30	11	111	20	13	2426	35.3745	-22.996	22.6798	-31.6908	10.3741	106	103	7	13	302.6	16.25
1003	30	11	111	20	13	2506	35.3745	-22.996	22.6798	-31.6908	10.3741	106	103	7	13	298.9	16.25
1004	30	11	111	20	13	2432	35.3745	-22.996	22.6798	-31.6908	10.3741	106	103	7	13	293.7	16.25
1005	30	11	111	20	13	2401	35.3745	-22.996	22.6798	-31.6908	10.3741	106	103	7	13	295.3	16.25
1006	30	11	131	22	12	2709	35.3745	-22.996	22.6798	-31.6908	10.3741	106	103	7	13	302.6	16.25
1007	30	11	131	24	13	2695	35.3745	-22.996	22.6798	-31.6908	10.3741	106	103	7	13	302.6	16.25
1008	30	11	111	20	13	2583	33.515	-22.5692	20.8124	-31.4543	10.407	90	107	8	11	303.3	13.6667
1009	30	11	131	24	13	2785	35.3745	-22.996	22.6798	-31.6908	10.3741	106	103	7	13	298.9	16.25
1010	30	11	131	24	13	2677	33.515	-22.5692	20.8124	-31.4543	10.407	90	107	8	11	303.3	13.6667
1011	30	11	111	20	13	2520	33.515	-22.5692	20.8124	-31.4543	10.407	90	107	8	11	303	13.6667
1012	30	11	111	20	13	2750	33.515	-22.5692	20.8124	-31.4543	10.407	90	107	8	11	303.3	13.6667
1013	30	11	131	24	13	2689	33.515	-22.5692	20.8124	-31.4543	10.407	90	107	8	11	314.8	13.6667
1014	30	11	131	24	13	2945	35.3745	-22.996	22.6798	-31.6908	10.3741	106	103	7	13	310.6	16.25
1015	30	11	111	20	13	2622	33.515	-22.5692	20.8124	-31.4543	10.407	90	107	8	11	314.6	13.6667
1016	30	11	131	22	12	2418	35.3745	-22.996	22.6798	-31.6908	10.3741	106	103	7	13	301.7	23.1667
1017	30	11	131	24	13	3024	33.515	-22.5692	20.8124	-31.4543	10.407	90	107	8	11	329.4	13.6667
1018	30	11	131	24	13	2845	33.515	-22.5692	20.8124	-31.4543	10.407	90	107	8	11	332.9	13.6667
1019	30	11	111	20	13	2831	33.515	-22.5692	20.8124	-31.4543	10.407	90	107	8	11	314.6	13.6667
1020	30	11	111	20	13	2661	35.3745	-22.996	22.6798	-31.6908	10.3741	106	103	7	13	301.7	16.25
1021	30	11	131	24	13	2924	33.515	-22.5692	20.8124	-31.4543	10.407	90	107	8	11	321.3	10.75
1022	30	11	111	20	13	2566	35.3745	-22.996	22.6798	-31.6908	10.3741	106	103	7	13	301.7	23.1667
1023	30	11	111	20	13	2639	35.3745	-22.996	22.6798	-31.6908	10.3741	106	103	7	13	301.7	23.1667
1024	30	11	131	24	13	3020	33.515	-22.5692	20.8124	-31.4543	10.407	90	107	8	11	352.3	8.41667
1025	30	11	111	20	13	2726	35.3745	-22.996	22.6798	-31.6908	10.3741	106	103	7	13	327.2	23.1667
1026	30	11	111	20	13	2923	35.3745	-22.996	22.6798	-31.6908	10.3741	106	103	7	13	310.8	23.1667
1027	30	11	131	22	10	3124	33.515	-22.5692	20.8124	-31.4543	10.407	90	107	8	11	340.2	24.9167
1028	30	11	131	22	10	2837	35.3745	-22.996	22.6798	-31.6908	10.3741	106	103	7	13	330.6	24.9167
1029	30	11	131	22	10	2909	33.515	-22.5692	20.8124	-31.4543	10.407	90	107	8	11	340.2	24.9167
1030	30	11	111	22	14	3121	33.515	-22.5692	20.8124	-31.4543	10.407	90	107	8	11	340.2	19.3333
1031	30	11	111	22	14	2617	35.3745	-22.996	22.6798	-31.6908	10.3741	106	103	7	13	290.7	24.9167
1032	30	11	111	22	14	2772	35.3745	-22.996	22.6798	-31.6908	10.3741	106	103	7	13	300.3	24.9167
1033	30	11	131	22	9	3014	33.515	-22.5692	20.8124	-31.4543	10.407	90	107	8	11	339.3	19.3333
1034	30	11	111	22	14	2885	33.515	-22.5692	20.8124	-31.4543	10.407	90	107	8	11	309.9	24.9167
1035	30	11	131	22	12	2662	35.3745	-22.996	22.6798	-31.6908	10.3741	106	103	7	13	309.9	24.9167
1036	261	13	51	20	3.5	2225	35.3745	-22.996	22.6798	-31.6908	10.3741	106	103	7	13	263.8	34
1037	261	13	51	20	3.5	2226	35.3745	-22.996	22.6798	-31.6908	10.3741	106	103	7	13	263.8	34
1038	30	11	111	22	14	3068	33.515	-22.5692	20.8124	-31.4543	10.407	90	107	8	11	339.3	19.3333
1039	261	13	51	20	3.5	2232	35.3745	-22.996	22.6798	-31.6908	10.3741	106	103	7	13	268.2	24.9167
1040	30	11	111	20	12	2284	35.3745	-22.996	22.6798	-31.6908	10.3741	106	103	7	13	263.8	34
1041	30	11	111	22	14	2593	35.3745	-22.996	22.6798	-31.6908	10.3741	106	103	7	13	309.9	24.9167
1042	30	11	111	22	14	2641	33.515	-22.5692	20.8124	-31.4543	10.407	90	107	8	11	302	19.3333
1043	261	13	51	20	3.5	2242	35.3745	-22.996	22.6798	-31.6908	10.3741	106	103	7	13	270.3	24.9167
1044	261	13	51	20	3.5	2247	35.3745	-22.996	22.6798	-31.6908	10.3741	106	103	7	13	268.8	24.9167
1045	261	13	51	20	3.5	2268	35.3745	-22.996	22.6798	-31.6908	10.3741	106	103	7	13	268.8	24.9167
1046	30	11	111	20	13	2288	35.3745	-22.996	22.6798	-31.6908	10.3741	106	103	7	13	270.9	24.9167
1047	30	11	111	22	14	2297	35.3745	-22.996	22.6798	-31.6908	10.3741	106	103	7	13	282.5	24.9167
1048	30	11	111	22	14	2487	35.3745	-22.996	22.6798	-31.6908	10.3741	106	103	7	13	290.3	24.9167
1049	30	11	111	22	14	2503	33.515	-22.5692	20.8124	-31.4543	10.407	90	107	8	11	284.5	26.75
1050	30	11	111	22	14	2574	35.3745	-22.996	22.6798	-31.6908	10.3741	106	103	7	13	290.3	26.75
1051	30	11	111	22	14	2710	33.515	-22.5692	20.8124	-31.4543	10.407	90	107	8	11	320.2	30.6667
1052	30	11	111	22	14	2612	35.3745	-22.996	22.6798	-31.6908	10.3741	106	103	7	13	284.5	26.75
1053	30	11	111	22	14	2663	33.515	-22.5692	20.8124	-31.4543	10.407	90	107	8	11	284.5	26.75
1054	30	11	111	22	14	2379	33.515	-22.5692	20.8124	-31.4543	10.407	90	107	8	11	290.2	30.6667
1055	30	11	111	22	14	2402	33.515	-22.5692	20.8124	-31.4543	10.407	90	107	8	11	284.3	30.6667
1056	30	11	111	22	14	2651	33.515	-22.5692	20.8124	-31.4543	10.407	90	107	8	11	298.6	30.6667
1057	30	11	111	22	14	2632	33.515	-22.5692	20.8124	-31.4543	10.407	90	107	8	11	298.6	30.6667
1058	30	11	111	22	14	3265	33.515	-22.5692	20.8124	-31.4543	10.407	90	107	8	11	366.5	22.9167
1059	30	11	111	22	14	3169	33.515	-22.5692	20.8124	-31.4543	10.407	90	107	8	11	349.5	22.9167
1060	30	11	111	22	14	3350	33.515	-22.5692	20.8124	-31.4543	10.407	90	107	8	11	366.5	22.9167
1061	30	11	111	20	13	2988	33.515	-22.5692	20.8124	-31.4543	10.407	90	107	8	11	349.5	22.9167
1062	30	11	111	22	14	2970	33.515	-22.5692	20.8124	-31.4543	10.407	90	107	8	11	330.9	22.9167
1063	30	11	111	20	13	2558	33.515	-22.5692	20.8124	-31.4543	10.407	90	107	8	11	287.1	30.6667
1064	30	11	111	20	13	2545	33.515	-22.5692	20.8124	-31.4543	10.407	90	107	8	11	278.4	30.6667
1065	30	11	111	22	14	2881	33.515	-22.5692	20.8124	-31.4543	10.407	90	107	8	11	311.6	22.9167
1066	30	11	111	20	13	2589	33.515	-22.5692	20.8124	-31.4543	10.407	90	107	8	11	295.7	30.6667
1067	30	11	111	20	13	2968	33.515	-22.5692	20.8124	-31.4543	10.407	90	107	8	11	347.3	16.25
1068	30	11	111	20	13	2942	33.515	-22.5692	20.8124	-31.4543	10.407	90	107	8	11	347.3	16.25
1069	30	11	131	22	10	2752	33.515	-22.5692	20.8124	-31.4543	10.407	90	107	8	11	284.8	30.6667
1070	30	11	111	20	13	2915	33.515	-22.5692	20.8124	-31.4543	10.407	90	107	8	11	347.3	16.25
1071	30	11	111	20	13	2558	33.515	-22.5692	20.8124	-31.4543	10.407	90	107	8	11	275.5	30.6667
1072	30	11	111	20	13	2650	33.515	-22.5692	20.8124	-31.4543	10.407	90	107	8	11	275.5	30.6667
1073	30	11	111	20	13	2716	33.515	-22.5692	20.8124	-31.4543	10.407	90	107	8	11	284.8	30.6667
1074	30	11	111	22	13	2665	33.515	-22.5692	20.8124	-31.4543	10.407	90	107	8	11	303.6	30.6667
1075	30	11	111	22	14	2608	30.3539	-19.7598	17.8661	-28.7253	10.6597	67	100	8	10	288.7	22.9167
1076	30	11	111	22	14	2632	30.3539	-19.7598	17.8661	-28.7253	10.6597	67	100	8	10	288.7	22.9167
1077	30	11	111	20	13	2878	30.3539	-19.7598	17.8661	-28.7253	10.6597	67	100	8	10	317.6	16.25
1078	30	11	111	20	13	2973	30.3539	-19.7598	17.8661	-28.7253	10.6597	67	100	8	10	337.8	16.25
1079	30	11	111	22	14	2691	30.3539	-19.7598	17.8661	-28.7253	10.6597	67	100	8	10	284.8	28
1080	30	11	111	20	13	2799	30.3539	-19.7598	17.8661	-28.7253	10.6597	67	100	8	10	317.6	28
1081	30	11	111	20	13	2794	30.3539	-19.7598	17.8661	-28.7253	10.6597	67	100	8	10	317.6	28
1082	30	11	131	22	9	2757	30.3539	-19.7598	17.8661	-28.7253	10.6597	67	100	8	10	293.3	28
1083	30	11	131	24	13	2784	30.3539	-19.7598	17.8661	-28.7253	10.6597	67	100	8	10	317.8	28
1084	30	11	131	24	13	2708	30.3539	-19.7598	17.8661	-28.7253	10.6597	67	100	8	10	289.4	26.9167
1085	30	11	111	22	14	2522	30.3539	-19.7598	17.8661	-28.7253	10.6597	67	100	8	10	283.6	28
1086	30	11	131	22	9	2764	30.3539	-19.7598	17.8661	-28.7253	10.6597	67	100	8	10	283.6	28
1087	30	11	131	24	13	2587	30.3539	-19.7598	17.8661	-28.7253	10.6597	67	100	8	10	307.5	26.9167
1088	30	11	111	22	14	2575	30.3539	-19.7598	17.8661	-28.7253	10.6597	67	100	8	10	286	28
1089	30	11	131	24	13	2529	30.3539	-19.7598	17.8661	-28.7253	10.6597	67	100	8	10	295.7	26.9167
1090	30	11	131	24	13	2586	30.3539	-19.7598	17.8661	-28.7253	10.6597	67	100	8	10	295.7	26.9167
1091	30	11	111	22	14	2728	30.3539	-19.7598	17.8661	-28.7253	10.6597	67	100	8	10	302.6	28
1092	30	11	111	22	14	2628	30.3539	-19.7598	17.8661	-28.7253	10.6597	67	100	8	10	292.5	28
1093	30	11	111	22	14	2673	30.3539	-19.7598	17.8661	-28.7253	10.6597	67	100	8	10	292.5	26.9167
1094	30	11	131	24	13	2630	30.3539	-19.7598	17.8661	-28.7253	10.6597	67	100	8	10	290.5	28
1095	30	11	131	24	13	2684	30.3539	-19.7598	17.8661	-28.7253	10.6597	67	100	8	10	295.7	26.9167
1096	30	11	111	22	14	2776	30.3539	-19.7598	17.8661	-28.7253	10.6597	67	100	8	10	292.5	28
1097	30	11	131	24	13	2670	30.3539	-19.7598	17.8661	-28.7253	10.6597	67	100	8	10	295.7	26.9167
1098	30	11	131	24	13	2861	30.3539	-19.7598	17.8661	-28.7253	10.6597	67	100	8	10	290.5	28
1099	30	11	131	24	13	2897	30.3539	-19.7598	17.8661	-28.7253	10.6597	67	100	8	10	317.6	28
1100	261	13	51	20	3.5	2725	30.3539	-19.7598	17.8661	-28.7253	10.6597	67	100	8	10	304.1	28
1101	261	13	51	20	3.5	2699	30.3539	-19.7598	17.8661	-28.7253	10.6597	67	100	8	10	299	28
1102	261	13	51	20	3.5	2759	30.3539	-19.7598	17.8661	-28.7253	10.6597	67	100	8	10	301.5	24.0833
1103	261	13	51	20	3.5	3002	30.3539	-19.7598	17.8661	-28.7253	10.6597	67	100	8	10	328.2	19.0833
1104	261	13	51	20	3.5	2937	30.3539	-19.7598	17.8661	-28.7253	10.6597	67	100	8	10	324.8	26.4167
1105	261	13	51	20	3.5	2883	30.3539	-19.7598	17.8661	-28.7253	10.6597	67	100	8	10	320.9	26.4167
1106	261	13	51	20	3.5	2884	30.3539	-19.7598	17.8661	-28.7253	10.6597	67	100	8	10	304.3	22.6667
1107	261	13	51	20	3.5	2874	30.3539	-19.7598	17.8661	-28.7253	10.6597	67	100	8	10	300.3	22.6667
1108	30	11	111	20	13	2925	32.6892	-26.3088	18.9896	-36.1485	11.6791	74	112	4	17	371.7	18.75
1109	261	13	51	20	3.5	2869	30.3539	-19.7598	17.8661	-28.7253	10.6597	67	100	8	10	299.3	22.6667
1110	261	13	51	20	3.5	2899	30.3539	-19.7598	17.8661	-28.7253	10.6597	67	100	8	10	299.3	22.6667
1111	263	13	25	3	4	832	38.5943	-24.3812	26.019	-32.532	9.98892	134	102	6	15	208.3	83.3333
1112	263	13	25	4	6	1079	38.6089	-24.3569	25.7464	-33.1355	10.385	134	102	6	15	217.4	77.8333
1113	263	13	25	4	6	1069	38.6089	-24.3569	25.7464	-33.1355	10.385	134	102	6	15	217.4	77.8333
1114	263	13	25	3	6	1090	38.6089	-24.3569	25.7464	-33.1355	10.385	134	102	6	15	225.5	77.8333
1115	263	13	25	4	6	1180	38.5943	-24.3812	26.019	-32.532	9.98892	134	102	6	15	235.5	76
1116	263	13	25	4	8	1182	38.5943	-24.3812	26.019	-32.532	9.98892	134	102	6	15	235.7	76
1117	263	13	25	3	3	1177	38.5943	-24.3812	26.019	-32.532	9.98892	134	102	6	15	236.3	76
1118	263	13	25	4	6	1176	38.5943	-24.3812	26.019	-32.532	9.98892	134	102	6	15	236.3	76
1119	263	13	25	4	7	1178	38.5943	-24.3812	26.019	-32.532	9.98892	134	102	6	15	236.3	76
1120	263	13	25	8	8	1167	38.5943	-24.3812	26.019	-32.532	9.98892	134	102	6	15	236.3	75
1121	263	13	25	8	5	1182	38.5943	-24.3812	26.019	-32.532	9.98892	134	102	6	15	235.5	76
1122	263	13	25	10	5	1185	38.5943	-24.3812	26.019	-32.532	9.98892	134	102	6	15	235.7	76
1123	263	13	25	12	5	1170	38.5943	-24.3812	26.019	-32.532	9.98892	134	102	6	15	236.6	76.9167
1124	263	13	25	10	6	1173	38.5943	-24.3812	26.019	-32.532	9.98892	134	102	6	15	236.6	76.9167
1125	263	13	25	8	5	1187	38.5943	-24.3812	26.019	-32.532	9.98892	134	102	6	15	236.3	76
1126	263	13	25	12	5	1194	38.5943	-24.3812	26.019	-32.532	9.98892	134	102	6	15	235.5	76
1127	263	13	25	10	10	1190	38.5943	-24.3812	26.019	-32.532	9.98892	134	102	6	15	236.3	76
1128	263	13	25	14	8	1160	38.5943	-24.3812	26.019	-32.532	9.98892	134	102	6	15	231.5	76.9167
1129	263	13	25	6	5	1140	38.6089	-24.3569	25.7464	-33.1355	10.385	134	102	6	15	218.9	77.8333
1130	263	13	25	12	5	1207	38.5943	-24.3812	26.019	-32.532	9.98892	134	102	6	15	236	76.9167
1131	263	13	25	10	5	1159	38.5943	-24.3812	26.019	-32.532	9.98892	134	102	6	15	247.3	75.5833
1132	263	13	25	3	5	1189	38.5943	-24.3812	26.019	-32.532	9.98892	134	102	6	15	238.7	76.9167
1133	263	13	25	6	5	1307	38.5943	-24.3812	26.019	-32.532	9.98892	134	102	6	15	251.5	70.8333
1134	263	13	25	3	5	1293	38.5943	-24.3812	26.019	-32.532	9.98892	134	102	6	15	251.5	70.8333
1135	263	13	25	8	5	1359	38.5943	-24.3812	26.019	-32.532	9.98892	134	102	6	15	256.6	68.5833
1136	30	11	172	30	16.5	2380	39.0652	-24.1724	26.1126	-32.2137	10.1516	133	101	9	16	377.9	25.75
1137	30	11	142	22	14	2003	39.0652	-24.1724	26.1126	-32.2137	10.1516	133	101	9	16	365.4	42.6667
1138	30	11	142	22	15.1	2158	39.0652	-24.1724	26.1126	-32.2137	10.1516	133	101	9	16	377.9	25.75
1139	30	11	122	20	13.9	2336	39.0652	-24.1724	26.1126	-32.2137	10.1516	133	101	9	16	385.7	25.75
1140	30	11	172	28	14.7	2600	39.0652	-24.1724	26.1126	-32.2137	10.1516	133	101	9	16	410	25.75
1141	30	11	142	22	15.3	2346	39.0652	-24.1724	26.1126	-32.2137	10.1516	133	101	9	16	385.7	25.75
1142	30	11	142	22	14.6	2235	39.0652	-24.1724	26.1126	-32.2137	10.1516	133	101	9	16	366.7	25.75
1143	30	11	72	12	10	2327	39.0652	-24.1724	26.1126	-32.2137	10.1516	133	101	9	16	385.7	25.75
1144	30	11	142	22	15.1	1968	39.0652	-24.1724	26.1126	-32.2137	10.1516	133	101	9	16	364.7	42.6667
1145	30	11	172	26	14.6	2401	39.0652	-24.1724	26.1126	-32.2137	10.1516	133	101	9	16	400.3	25.75
1146	30	11	142	22	15.1	2122	39.0652	-24.1724	26.1126	-32.2137	10.1516	133	101	9	16	366.7	25.75
1147	30	11	142	22	15.1	2038	39.0652	-24.1724	26.1126	-32.2137	10.1516	133	101	9	16	366.7	42.6667
1148	30	11	142	16	8.3	2596	39.0652	-24.1724	26.1126	-32.2137	10.1516	133	101	9	16	400.3	25.75
1149	30	11	162	28	15.8	2287	39.0652	-24.1724	26.1126	-32.2137	10.1516	133	101	9	16	382.3	25.75
1150	30	11	142	24	15.1	2172	39.0652	-24.1724	26.1126	-32.2137	10.1516	133	101	9	16	366	25.75
1151	30	11	142	24	15.1	2128	39.0652	-24.1724	26.1126	-32.2137	10.1516	133	101	9	16	366	42.6667
1152	30	11	142	22	15.3	2428	39.0652	-24.1724	26.1126	-32.2137	10.1516	133	101	9	16	382.3	25.75
1153	30	11	142	22	15.1	2155	39.0652	-24.1724	26.1126	-32.2137	10.1516	133	101	9	16	366	42.6667
1154	30	11	142	22	15.1	2068	39.0652	-24.1724	26.1126	-32.2137	10.1516	133	101	9	16	366	42.6667
1155	30	11	142	22	14.1	1940	39.0652	-24.1724	26.1126	-32.2137	10.1516	133	101	9	16	359.1	42.6667
1156	30	11	172	24	15	2483	39.0652	-24.1724	26.1126	-32.2137	10.1516	133	101	9	16	374.1	22.5833
1157	30	11	112	16	14.2	1996	39.0652	-24.1724	26.1126	-32.2137	10.1516	133	101	9	16	359.5	35.1667
1158	30	11	142	22	15.1	2196	39.0652	-24.1724	26.1126	-32.2137	10.1516	133	101	9	16	368.4	22.5833
1159	30	11	142	22	15.6	2173	39.0652	-24.1724	26.1126	-32.2137	10.1516	133	101	9	16	368.4	22.5833
1160	30	11	142	22	15.1	1988	39.0652	-24.1724	26.1126	-32.2137	10.1516	133	101	9	16	356.7	35.1667
1161	30	11	142	22	15.1	2075	39.0652	-24.1724	26.1126	-32.2137	10.1516	133	101	9	16	360.5	22.5833
1162	30	11	142	24	15.6	2305	39.0652	-24.1724	26.1126	-32.2137	10.1516	133	101	9	16	374.1	22.5833
1163	30	11	142	22	15.4	2412	39.0652	-24.1724	26.1126	-32.2137	10.1516	133	101	9	16	374.1	22.5833
1164	30	11	152	26	15.8	2241	39.0652	-24.1724	26.1126	-32.2137	10.1516	133	101	9	16	369.5	22.5833
1165	30	11	142	26	18.1	2177	39.0652	-24.1724	26.1126	-32.2137	10.1516	133	101	9	16	360.2	22.5833
1166	30	11	152	24	15	2392	39.0652	-24.1724	26.1126	-32.2137	10.1516	133	101	9	16	387.2	22.5833
1167	30	11	142	20	13.8	2622	39.0652	-24.1724	26.1126	-32.2137	10.1516	133	101	9	16	401.6	22.5833
1168	30	11	112	16	11.5	2197	39.0652	-24.1724	26.1126	-32.2137	10.1516	133	101	9	16	360.2	35.1667
1169	30	11	122	20	13.2	1958	39.0652	-24.1724	26.1126	-32.2137	10.1516	133	101	9	16	350.2	35.1667
1170	30	11	142	24	14.9	2068	39.0652	-24.1724	26.1126	-32.2137	10.1516	133	101	9	16	350.2	35.1667
1171	30	11	132	18	7.9	2469	39.1674	-24.0524	26.002	-31.9559	10.2294	131	100	10	16	408.6	22.5833
1172	30	11	102	16	12.8	1932	39.0652	-24.1724	26.1126	-32.2137	10.1516	133	101	9	16	350.2	35.1667
1173	30	11	112	18	12.9	2011	39.0652	-24.1724	26.1126	-32.2137	10.1516	133	101	9	16	350.2	35.1667
1174	30	11	147	24	12.5	2459	39.0652	-24.1724	26.1126	-32.2137	10.1516	133	101	9	16	401.6	22.5833
1175	30	11	152	28	15	2305	39.0652	-24.1724	26.1126	-32.2137	10.1516	133	101	9	16	387.2	22.5833
1176	30	11	147	22	13.8	2107	39.0652	-24.1724	26.1126	-32.2137	10.1516	133	101	9	16	360.2	22.5833
1177	30	11	152	28	15.6	2281	39.0652	-24.1724	26.1126	-32.2137	10.1516	133	101	9	16	387.2	22.5833
1178	30	11	132	18	7.8	2566	39.1674	-24.0524	26.002	-31.9559	10.2294	131	100	10	16	417.8	13.9167
1179	30	11	147	26	12.7	2300	39.0652	-24.1724	26.1126	-32.2137	10.1516	133	101	9	16	387.2	22.5833
1180	30	11	162	26	13	2369	39.0652	-24.1724	26.1126	-32.2137	10.1516	133	101	9	16	356.6	22.5833
1181	30	11	112	16	14	2434	39.0652	-24.1724	26.1126	-32.2137	10.1516	133	101	9	16	377.7	22.5833
1182	30	11	142	18	8.3	2490	39.1674	-24.0524	26.002	-31.9559	10.2294	131	100	10	16	409.9	13.9167
1183	30	11	137	26	14	2268	39.0652	-24.1724	26.1126	-32.2137	10.1516	133	101	9	16	356.6	22.5833
1184	30	11	122	16	7.3	2285	39.0652	-24.1724	26.1126	-32.2137	10.1516	133	101	9	16	365.9	22.5833
1185	30	11	142	28	15.1	2129	39.0652	-24.1724	26.1126	-32.2137	10.1516	133	101	9	16	356.6	22.5833
1186	30	11	132	18	8.6	2522	39.1674	-24.0524	26.002	-31.9559	10.2294	131	100	10	16	409.9	13.9167
1187	30	11	122	18	16.3	2410	39.1674	-24.0524	26.002	-31.9559	10.2294	131	100	10	16	391.4	13.9167
1188	30	11	122	22	12.7	1952	39.0652	-24.1724	26.1126	-32.2137	10.1516	133	101	9	16	337.6	31.3333
1189	30	11	122	18	9.5	1980	39.0652	-24.1724	26.1126	-32.2137	10.1516	133	101	9	16	354	22.5833
1190	30	11	122	22	13.8	1991	39.0652	-24.1724	26.1126	-32.2137	10.1516	133	101	9	16	351.9	31.3333
1191	30	11	112	18	15	2262	39.0652	-24.1724	26.1126	-32.2137	10.1516	133	101	9	16	366.7	22.5833
1192	30	11	122	20	14.8	2082	39.0652	-24.1724	26.1126	-32.2137	10.1516	133	101	9	16	356.7	22.5833
1193	30	11	122	22	14.3	2056	39.0652	-24.1724	26.1126	-32.2137	10.1516	133	101	9	16	337.6	31.3333
1194	30	11	122	18	10.6	2076	39.0652	-24.1724	26.1126	-32.2137	10.1516	133	101	9	16	349.2	35.1667
1195	30	11	122	18	8.5	2064	38.793	-24.3254	26.0373	-32.519	10.094	134	102	7	16	333.9	34
1196	30	11	122	18	10.6	2165	39.0652	-24.1724	26.1126	-32.2137	10.1516	133	101	9	16	357.2	22.5833
1197	30	11	122	18	9.5	1995	38.793	-24.3254	26.0373	-32.519	10.094	134	102	7	16	333.9	34
1198	30	11	132	20	9.4	1976	38.793	-24.3254	26.0373	-32.519	10.094	134	102	7	16	324.7	34
1199	30	11	132	20	10.4	1928	38.793	-24.3254	26.0373	-32.519	10.094	134	102	7	16	337.4	34
1200	30	11	97	18	11.4	2031	39.0652	-24.1724	26.1126	-32.2137	10.1516	133	101	9	16	357.8	31.3333
1201	30	11	122	16	8.5	2097	39.0652	-24.1724	26.1126	-32.2137	10.1516	133	101	9	16	334.8	35.1667
1202	30	11	152	28	16	1879	39.0652	-24.1724	26.1126	-32.2137	10.1516	133	101	9	16	336.4	27.25
1203	30	11	92	18	13.1	2119	39.0652	-24.1724	26.1126	-32.2137	10.1516	133	101	9	16	351.9	31.3333
1204	30	11	122	20	12.7	2247	39.0652	-24.1724	26.1126	-32.2137	10.1516	133	101	9	16	356.7	22.5833
1205	30	11	142	22	14.8	1825	39.0652	-24.1724	26.1126	-32.2137	10.1516	133	101	9	16	336.4	27.25
1206	30	11	122	22	12.7	2044	39.0652	-24.1724	26.1126	-32.2137	10.1516	133	101	9	16	347.9	31.3333
1207	30	11	112	16	13	1971	38.793	-24.3254	26.0373	-32.519	10.094	134	102	7	16	328.7	34
1208	30	11	122	20	14.3	2052	39.0652	-24.1724	26.1126	-32.2137	10.1516	133	101	9	16	358.5	31.3333
1209	30	11	92	18	10.9	2117	39.0652	-24.1724	26.1126	-32.2137	10.1516	133	101	9	16	357.8	31.3333
1210	30	11	122	18	13.3	2283	39.0652	-24.1724	26.1126	-32.2137	10.1516	133	101	9	16	359.8	22.5833
1211	30	11	122	22	13.3	2044	39.0652	-24.1724	26.1126	-32.2137	10.1516	133	101	9	16	351.9	31.3333
1212	30	11	107	20	12.7	2039	39.0652	-24.1724	26.1126	-32.2137	10.1516	133	101	9	16	357.8	31.3333
1213	30	11	132	24	17.7	1995	39.0652	-24.1724	26.1126	-32.2137	10.1516	133	101	9	16	351.7	27.25
1214	30	11	122	22	14.3	2135	39.0652	-24.1724	26.1126	-32.2137	10.1516	133	101	9	16	358.5	31.3333
1215	30	11	122	20	12.9	2072	39.0652	-24.1724	26.1126	-32.2137	10.1516	133	101	9	16	351.9	31.3333
1216	30	11	107	20	14.8	2114	39.0652	-24.1724	26.1126	-32.2137	10.1516	133	101	9	16	351.9	31.3333
1217	30	11	122	16	9.5	2341	39.0652	-24.1724	26.1126	-32.2137	10.1516	133	101	9	16	394.1	22.5833
1218	30	11	117	20	14.8	2089	39.0652	-24.1724	26.1126	-32.2137	10.1516	133	101	9	16	357.8	31.3333
1219	30	11	32	6	3	1912	39.0652	-24.1724	26.1126	-32.2137	10.1516	133	101	9	16	336.4	29.6667
1220	30	11	62	10	8.4	2075	39.0652	-24.1724	26.1126	-32.2137	10.1516	133	101	9	16	351.7	31.3333
1221	30	11	122	24	17.5	1894	39.0652	-24.1724	26.1126	-32.2137	10.1516	133	101	9	16	331.2	29.6667
1222	30	11	37	8	4.6	1971	39.0652	-24.1724	26.1126	-32.2137	10.1516	133	101	9	16	357.9	27.25
1223	30	11	37	8	4	1967	39.0652	-24.1724	26.1126	-32.2137	10.1516	133	101	9	16	336.4	27.25
1224	30	11	102	18	12.3	2195	39.0652	-24.1724	26.1126	-32.2137	10.1516	133	101	9	16	375.6	31.3333
1225	30	11	112	18	15	1897	39.0652	-24.1724	26.1126	-32.2137	10.1516	133	101	9	16	328.7	34.9167
1226	30	11	112	16	10	2423	39.1674	-24.0524	26.002	-31.9559	10.2294	131	100	10	16	389.2	13.9167
1227	30	11	137	24	16	1916	39.0652	-24.1724	26.1126	-32.2137	10.1516	133	101	9	16	334.9	34.9167
1228	30	11	122	18	12.7	2386	39.0652	-24.1724	26.1126	-32.2137	10.1516	133	101	9	16	387.1	22.5833
1229	30	11	122	20	15.5	1804	39.0652	-24.1724	26.1126	-32.2137	10.1516	133	101	9	16	323.4	34.9167
1230	30	11	102	18	10.4	2179	39.0652	-24.1724	26.1126	-32.2137	10.1516	133	101	9	16	351.7	31.3333
1231	30	11	112	16	9.5	2412	39.0652	-24.1724	26.1126	-32.2137	10.1516	133	101	9	16	405.4	22.5833
1232	30	11	52	10	6.8	1997	39.0652	-24.1724	26.1126	-32.2137	10.1516	133	101	9	16	342	27.25
1233	30	11	122	18	13.8	2315	39.1674	-24.0524	26.002	-31.9559	10.2294	131	100	10	16	387.1	22.5833
1234	30	11	137	22	13	2175	39.0652	-24.1724	26.1126	-32.2137	10.1516	133	101	9	16	371.5	31.3333
1235	30	11	127	20	15.9	2106	39.0652	-24.1724	26.1126	-32.2137	10.1516	133	101	9	16	342	27.25
1236	30	11	122	18	8.5	2093	39.0652	-24.1724	26.1126	-32.2137	10.1516	133	101	9	16	358.5	31.3333
1237	30	11	112	20	14.4	2089	39.0652	-24.1724	26.1126	-32.2137	10.1516	133	101	9	16	354.4	29.6667
1238	30	11	142	20	14.6	2044	39.0652	-24.1724	26.1126	-32.2137	10.1516	133	101	9	16	334.8	35.1667
1239	30	11	37	8	4	1876	39.0652	-24.1724	26.1126	-32.2137	10.1516	133	101	9	16	347.5	29.6667
1240	30	11	122	14	11.7	1964	39.0652	-24.1724	26.1126	-32.2137	10.1516	133	101	9	16	338.4	27.25
1241	30	11	122	16	7.4	2516	39.0652	-24.1724	26.1126	-32.2137	10.1516	133	101	9	16	394.1	22.5833
1242	30	11	117	12	8.3	1876	39.0652	-24.1724	26.1126	-32.2137	10.1516	133	101	9	16	359.5	31.3333
1243	30	11	132	26	15.7	2111	39.0652	-24.1724	26.1126	-32.2137	10.1516	133	101	9	16	374.6	31.3333
1244	30	11	127	22	12.7	2193	39.0652	-24.1724	26.1126	-32.2137	10.1516	133	101	9	16	371.5	31.3333
1245	30	11	127	20	12.7	2072	39.0652	-24.1724	26.1126	-32.2137	10.1516	133	101	9	16	356.8	27.25
1246	30	11	32	6	3	2285	39.0652	-24.1724	26.1126	-32.2137	10.1516	133	101	9	16	375.6	31.3333
1247	30	11	92	16	12.2	2049	39.0652	-24.1724	26.1126	-32.2137	10.1516	133	101	9	16	359.5	31.3333
1248	30	11	132	24	16.3	2014	39.0652	-24.1724	26.1126	-32.2137	10.1516	133	101	9	16	357.9	27.25
1249	30	11	42	10	5.7	2091	38.793	-24.3254	26.0373	-32.519	10.094	134	102	7	16	340.2	34
1250	30	11	37	8	4.1	1969	39.0652	-24.1724	26.1126	-32.2137	10.1516	133	101	9	16	334.9	34.9167
1251	30	11	122	20	15.5	2059	39.0652	-24.1724	26.1126	-32.2137	10.1516	133	101	9	16	347.5	29.6667
1252	30	11	117	20	12.7	2184	39.0652	-24.1724	26.1126	-32.2137	10.1516	133	101	9	16	362.3	31.3333
1253	30	11	37	8	4.4	1978	39.0652	-24.1724	26.1126	-32.2137	10.1516	133	101	9	16	356.8	27.25
1254	30	11	122	22	17.1	2047	39.0652	-24.1724	26.1126	-32.2137	10.1516	133	101	9	16	351.1	29.6667
1255	30	11	142	22	16.6	2116	39.0652	-24.1724	26.1126	-32.2137	10.1516	133	101	9	16	361.4	29.6667
1256	30	11	112	20	13.4	2169	39.0652	-24.1724	26.1126	-32.2137	10.1516	133	101	9	16	354.4	29.6667
1257	30	11	62	12	9	2248	39.0652	-24.1724	26.1126	-32.2137	10.1516	133	101	9	16	375.6	31.3333
1258	30	11	37	8	4	1928	39.0652	-24.1724	26.1126	-32.2137	10.1516	133	101	9	16	334.9	34.9167
1259	30	11	142	20	13.5	2030	39.0652	-24.1724	26.1126	-32.2137	10.1516	133	101	9	16	342.1	31.3333
1260	30	11	142	30	16.6	2020	39.0652	-24.1724	26.1126	-32.2137	10.1516	133	101	9	16	355.8	27.25
1261	30	11	112	16	12	2475	39.1674	-24.0524	26.002	-31.9559	10.2294	131	100	10	16	387.1	13.9167
1262	30	11	37	8	4.6	2030	39.0652	-24.1724	26.1126	-32.2137	10.1516	133	101	9	16	351.1	29.6667
1263	30	11	122	14	14.1	2027	39.0652	-24.1724	26.1126	-32.2137	10.1516	133	101	9	16	357.9	27.25
1264	30	11	102	18	14.4	1914	39.0652	-24.1724	26.1126	-32.2137	10.1516	133	101	9	16	315.2	34.9167
1265	30	11	117	20	14.3	2228	39.0652	-24.1724	26.1126	-32.2137	10.1516	133	101	9	16	375.6	31.3333
1266	30	11	122	16	7.4	2543	39.1674	-24.0524	26.002	-31.9559	10.2294	131	100	10	16	389.2	13.9167
1267	30	11	82	14	11.6	2177	39.0652	-24.1724	26.1126	-32.2137	10.1516	133	101	9	16	357.9	27.25
1268	30	11	122	20	11.7	2298	39.0652	-24.1724	26.1126	-32.2137	10.1516	133	101	9	16	371.5	31.3333
1269	30	11	127	22	14.3	2191	39.0652	-24.1724	26.1126	-32.2137	10.1516	133	101	9	16	362.3	27.25
1270	30	11	137	22	16.3	2025	39.0652	-24.1724	26.1126	-32.2137	10.1516	133	101	9	16	347.5	29.6667
1271	30	11	62	12	9	1999	39.0652	-24.1724	26.1126	-32.2137	10.1516	133	101	9	16	346.3	27.25
1272	30	11	132	18	13	2136	39.0652	-24.1724	26.1126	-32.2137	10.1516	133	101	9	16	342.1	31.3333
1273	30	11	142	20	14.6	1896	39.0652	-24.1724	26.1126	-32.2137	10.1516	133	101	9	16	328.9	34.9167
1274	30	11	52	10	5.7	2170	39.0652	-24.1724	26.1126	-32.2137	10.1516	133	101	9	16	355.8	29.6667
1275	30	11	127	22	13.3	2173	39.0652	-24.1724	26.1126	-32.2137	10.1516	133	101	9	16	359.5	31.3333
1276	30	11	112	20	13.5	2179	39.0652	-24.1724	26.1126	-32.2137	10.1516	133	101	9	16	351.1	29.6667
1277	30	11	122	20	14.3	2357	39.0652	-24.1724	26.1126	-32.2137	10.1516	133	101	9	16	371.5	31.3333
1278	30	11	112	20	16	2179	39.0652	-24.1724	26.1126	-32.2137	10.1516	133	101	9	16	351.1	29.6667
1279	30	11	142	24	15.1	2282	39.0652	-24.1724	26.1126	-32.2137	10.1516	133	101	9	16	371.5	31.3333
1280	30	11	152	24	15.2	2158	39.0652	-24.1724	26.1126	-32.2137	10.1516	133	101	9	16	357.9	27.25
1281	30	11	132	22	14	2181	39.0652	-24.1724	26.1126	-32.2137	10.1516	133	101	9	16	382	31.3333
1282	30	11	142	20	14.6	2129	39.0652	-24.1724	26.1126	-32.2137	10.1516	133	101	9	16	364.4	35.1667
1283	30	11	132	22	14.2	2229	39.0652	-24.1724	26.1126	-32.2137	10.1516	133	101	9	16	374.6	31.3333
1284	30	11	142	20	13.5	1976	39.0652	-24.1724	26.1126	-32.2137	10.1516	133	101	9	16	328.9	34.9167
1285	30	11	142	20	14.7	2286	39.0652	-24.1724	26.1126	-32.2137	10.1516	133	101	9	16	369.1	35.1667
1286	30	11	52	8	4.5	2289	39.0652	-24.1724	26.1126	-32.2137	10.1516	133	101	9	16	354.4	29.6667
1287	30	11	42	8	4.6	2218	39.0652	-24.1724	26.1126	-32.2137	10.1516	133	101	9	16	361.4	29.6667
1288	30	11	82	12	7.7	2185	39.0652	-24.1724	26.1126	-32.2137	10.1516	133	101	9	16	366.7	27.25
1289	30	11	122	20	13.8	2246	39.0652	-24.1724	26.1126	-32.2137	10.1516	133	101	9	16	362.3	27.25
1290	30	11	132	18	13.3	2026	39.0652	-24.1724	26.1126	-32.2137	10.1516	133	101	9	16	360.5	31.3333
1291	30	11	122	18	13.8	2287	39.0652	-24.1724	26.1126	-32.2137	10.1516	133	101	9	16	347.5	29.6667
1292	30	11	142	20	14.6	2086	39.0652	-24.1724	26.1126	-32.2137	10.1516	133	101	9	16	356.6	35.1667
1293	30	11	122	18	13.3	2279	39.0652	-24.1724	26.1126	-32.2137	10.1516	133	101	9	16	369.3	29.6667
1294	30	11	142	24	14.6	2489	39.0652	-24.1724	26.1126	-32.2137	10.1516	133	101	9	16	411	31.3333
1295	30	11	102	16	13.4	2258	39.0652	-24.1724	26.1126	-32.2137	10.1516	133	101	9	16	383.3	29.6667
1296	30	11	102	16	13.4	2294	39.0652	-24.1724	26.1126	-32.2137	10.1516	133	101	9	16	354.4	29.6667
1297	30	11	142	20	14.9	2196	39.0652	-24.1724	26.1126	-32.2137	10.1516	133	101	9	16	369.1	35.1667
1298	30	11	112	18	12.5	2150	39.0652	-24.1724	26.1126	-32.2137	10.1516	133	101	9	16	351.1	29.6667
1299	30	11	107	20	13.3	2387	39.0652	-24.1724	26.1126	-32.2137	10.1516	133	101	9	16	411	31.3333
1300	30	11	132	18	11.4	2442	39.0652	-24.1724	26.1126	-32.2137	10.1516	133	101	9	16	381	29.6667
1301	30	11	122	22	14.3	2376	39.0652	-24.1724	26.1126	-32.2137	10.1516	133	101	9	16	371.5	31.3333
1302	30	11	57	10	6.8	2261	39.0652	-24.1724	26.1126	-32.2137	10.1516	133	101	9	16	351.1	29.6667
1303	30	11	32	8	4.6	1975	39.0652	-24.1724	26.1126	-32.2137	10.1516	133	101	9	16	346.3	27.25
1304	30	11	147	24	14.6	2354	39.0652	-24.1724	26.1126	-32.2137	10.1516	133	101	9	16	404.5	31.3333
1305	30	11	42	8	4.6	2210	39.0652	-24.1724	26.1126	-32.2137	10.1516	133	101	9	16	354.4	29.6667
1306	30	11	132	22	13.2	2278	39.0652	-24.1724	26.1126	-32.2137	10.1516	133	101	9	16	374.6	31.3333
1307	30	11	142	22	13.5	2199	39.0652	-24.1724	26.1126	-32.2137	10.1516	133	101	9	16	361.4	29.6667
1308	30	11	102	16	10.7	2236	39.0652	-24.1724	26.1126	-32.2137	10.1516	133	101	9	16	379.8	29.6667
1309	30	11	152	24	15.2	2354	39.0652	-24.1724	26.1126	-32.2137	10.1516	133	101	9	16	386	27.25
1310	30	11	142	20	13.8	2280	39.0652	-24.1724	26.1126	-32.2137	10.1516	133	101	9	16	369.3	29.6667
1311	30	11	62	12	6.7	1878	39.0652	-24.1724	26.1126	-32.2137	10.1516	133	101	9	16	328.9	34.9167
1312	30	11	122	18	14	2117	39.0652	-24.1724	26.1126	-32.2137	10.1516	133	101	9	16	334.9	34.9167
1313	30	11	122	18	9.5	2343	39.0652	-24.1724	26.1126	-32.2137	10.1516	133	101	9	16	357.9	27.25
1314	30	11	142	20	14.9	2332	39.0652	-24.1724	26.1126	-32.2137	10.1516	133	101	9	16	382.1	22.5833
1315	30	11	137	18	13.3	2244	39.0652	-24.1724	26.1126	-32.2137	10.1516	133	101	9	16	356.6	35.1667
1316	30	11	142	20	13.5	2051	39.0652	-24.1724	26.1126	-32.2137	10.1516	133	101	9	16	319.1	35.1667
1317	30	11	142	20	14.9	2206	39.0652	-24.1724	26.1126	-32.2137	10.1516	133	101	9	16	319.1	35.1667
1318	30	11	142	20	14.6	2439	39.0652	-24.1724	26.1126	-32.2137	10.1516	133	101	9	16	393.4	22.5833
1319	30	11	142	20	12.5	2318	39.0652	-24.1724	26.1126	-32.2137	10.1516	133	101	9	16	381	29.6667
1320	30	11	112	18	14.7	2044	39.0652	-24.1724	26.1126	-32.2137	10.1516	133	101	9	16	348.4	34.9167
1321	30	11	102	18	12	2428	39.0652	-24.1724	26.1126	-32.2137	10.1516	133	101	9	16	383.3	29.6667
1322	30	11	122	24	14.9	2330	39.0652	-24.1724	26.1126	-32.2137	10.1516	133	101	9	16	379.8	29.6667
1323	30	11	142	22	15	2354	39.0652	-24.1724	26.1126	-32.2137	10.1516	133	101	9	16	378.4	31.3333
1324	30	11	112	18	11	2365	39.0652	-24.1724	26.1126	-32.2137	10.1516	133	101	9	16	379.8	29.6667
1325	30	11	142	20	13.9	2484	39.0652	-24.1724	26.1126	-32.2137	10.1516	133	101	9	16	393.4	22.5833
1326	30	11	142	22	15.1	2094	39.0652	-24.1724	26.1126	-32.2137	10.1516	133	101	9	16	376.5	27.25
1327	30	11	122	20	14.8	2262	39.0652	-24.1724	26.1126	-32.2137	10.1516	133	101	9	16	348.4	34.9167
1328	30	11	152	24	14.4	2394	39.0652	-24.1724	26.1126	-32.2137	10.1516	133	101	9	16	404.5	31.3333
1329	30	11	122	22	13.8	2498	39.0652	-24.1724	26.1126	-32.2137	10.1516	133	101	9	16	385.5	31.3333
1330	30	11	112	16	13.3	2504	39.0652	-24.1724	26.1126	-32.2137	10.1516	133	101	9	16	382.1	22.5833
1331	30	11	152	22	14.9	1923	39.0652	-24.1724	26.1126	-32.2137	10.1516	133	101	9	16	336.8	31.3333
1332	30	11	142	20	14.5	2059	39.0652	-24.1724	26.1126	-32.2137	10.1516	133	101	9	16	348.4	34.9167
1333	30	11	112	20	14	2416	39.0652	-24.1724	26.1126	-32.2137	10.1516	133	101	9	16	383.3	29.6667
1334	30	11	112	18	14.7	1940	39.0652	-24.1724	26.1126	-32.2137	10.1516	133	101	9	16	327.4	34.9167
1335	30	11	122	18	12.7	2237	39.0652	-24.1724	26.1126	-32.2137	10.1516	133	101	9	16	366.7	27.25
1336	30	11	142	22	14.9	2378	39.0652	-24.1724	26.1126	-32.2137	10.1516	133	101	9	16	386	27.25
1337	30	11	142	22	14.7	2373	39.0652	-24.1724	26.1126	-32.2137	10.1516	133	101	9	16	378.4	27.25
1338	30	11	142	16	9.9	2310	39.0652	-24.1724	26.1126	-32.2137	10.1516	133	101	9	16	376.3	31.3333
1339	30	11	117	20	11.7	2359	39.0652	-24.1724	26.1126	-32.2137	10.1516	133	101	9	16	376.5	27.25
1340	30	11	62	12	6.7	2392	39.0652	-24.1724	26.1126	-32.2137	10.1516	133	101	9	16	372.4	27.25
1341	30	11	142	14	8.3	2033	39.0652	-24.1724	26.1126	-32.2137	10.1516	133	101	9	16	360.5	31.3333
1342	30	11	142	26	15.1	2506	39.0652	-24.1724	26.1126	-32.2137	10.1516	133	101	9	16	383.3	29.6667
1343	30	11	142	26	15.1	2518	39.0652	-24.1724	26.1126	-32.2137	10.1516	133	101	9	16	385.5	31.3333
1344	30	11	137	20	13.5	2386	39.0652	-24.1724	26.1126	-32.2137	10.1516	133	101	9	16	372.4	27.25
1345	30	11	122	16	12.4	2546	39.0652	-24.1724	26.1126	-32.2137	10.1516	133	101	9	16	369.1	35.1667
1346	30	11	142	20	13.5	2297	39.0652	-24.1724	26.1126	-32.2137	10.1516	133	101	9	16	366.7	27.25
1347	30	11	102	16	11.8	1921	39.0652	-24.1724	26.1126	-32.2137	10.1516	133	101	9	16	340.7	34.9167
1348	30	11	102	18	12.8	2227	39.0652	-24.1724	26.1126	-32.2137	10.1516	133	101	9	16	348.4	34.9167
1349	30	11	152	24	13.4	2360	39.0652	-24.1724	26.1126	-32.2137	10.1516	133	101	9	16	376.5	29.6667
1350	30	11	102	24	12.8	1960	39.0652	-24.1724	26.1126	-32.2137	10.1516	133	101	9	16	327.4	34.9167
1351	30	11	142	18	12.2	2108	39.0652	-24.1724	26.1126	-32.2137	10.1516	133	101	9	16	335.5	35.1667
1352	30	11	142	20	11.4	2470	39.0652	-24.1724	26.1126	-32.2137	10.1516	133	101	9	16	372.4	27.25
1353	30	11	142	16	9.2	1952	39.0652	-24.1724	26.1126	-32.2137	10.1516	133	101	9	16	359.5	31.3333
1354	30	11	142	18	12.9	2445	39.0652	-24.1724	26.1126	-32.2137	10.1516	133	101	9	16	359.7	35.1667
1355	30	11	142	20	14	2357	39.0652	-24.1724	26.1126	-32.2137	10.1516	133	101	9	16	402.7	27.25
1356	30	11	47	10	7.7	1959	39.0652	-24.1724	26.1126	-32.2137	10.1516	133	101	9	16	327.4	34.9167
1357	30	11	132	20	12.9	2629	39.0652	-24.1724	26.1126	-32.2137	10.1516	133	101	9	16	417	31.3333
1358	30	11	142	22	14.4	1916	39.0652	-24.1724	26.1126	-32.2137	10.1516	133	101	9	16	329.4	34.9167
1359	30	11	112	22	15.9	1921	39.0652	-24.1724	26.1126	-32.2137	10.1516	133	101	9	16	327.4	34.9167
1360	30	11	142	20	11.4	2356	39.0652	-24.1724	26.1126	-32.2137	10.1516	133	101	9	16	398.4	27.25
1361	30	11	77	12	9.2	2145	39.0652	-24.1724	26.1126	-32.2137	10.1516	133	101	9	16	348.4	34.9167
1362	30	11	127	18	13	1915	39.0652	-24.1724	26.1126	-32.2137	10.1516	133	101	9	16	344.3	34.9167
1363	30	11	142	16	8.3	2233	39.0652	-24.1724	26.1126	-32.2137	10.1516	133	101	9	16	392.1	31.3333
1364	30	11	147	22	13.4	2362	39.0652	-24.1724	26.1126	-32.2137	10.1516	133	101	9	16	377.7	29.6667
1365	30	11	142	18	12.3	2439	39.0652	-24.1724	26.1126	-32.2137	10.1516	133	101	9	16	359.7	35.1667
1366	30	11	147	26	13.9	2279	39.0652	-24.1724	26.1126	-32.2137	10.1516	133	101	9	16	396.6	27.25
1367	30	11	52	8	6.3	1947	39.0652	-24.1724	26.1126	-32.2137	10.1516	133	101	9	16	341.4	34.9167
1368	30	11	142	18	13.1	2195	39.0652	-24.1724	26.1126	-32.2137	10.1516	133	101	9	16	335.5	35.1667
1369	30	11	147	20	12.1	2251	39.0652	-24.1724	26.1126	-32.2137	10.1516	133	101	9	16	361.4	34.9167
1370	30	11	142	18	12.8	2189	39.0652	-24.1724	26.1126	-32.2137	10.1516	133	101	9	16	375.3	31.3333
1371	30	11	142	16	8	1860	39.0652	-24.1724	26.1126	-32.2137	10.1516	133	101	9	16	345.2	31.3333
1372	30	11	152	20	10.3	2446	39.0652	-24.1724	26.1126	-32.2137	10.1516	133	101	9	16	396.6	27.25
1373	30	11	142	22	13.4	2415	39.0652	-24.1724	26.1126	-32.2137	10.1516	133	101	9	16	398.4	27.25
1374	30	11	142	20	10.4	2475	39.0652	-24.1724	26.1126	-32.2137	10.1516	133	101	9	16	402.7	27.25
1375	30	11	122	24	19	2011	39.0652	-24.1724	26.1126	-32.2137	10.1516	133	101	9	16	341.4	34.9167
1376	30	11	142	22	14.8	1926	39.0652	-24.1724	26.1126	-32.2137	10.1516	133	101	9	16	349.3	34.9167
1377	30	11	37	8	3.9	1958	39.0652	-24.1724	26.1126	-32.2137	10.1516	133	101	9	16	344.3	34.9167
1378	30	11	142	20	11.4	2392	39.0652	-24.1724	26.1126	-32.2137	10.1516	133	101	9	16	402.7	27.25
1379	30	11	142	16	7.6	2492	39.0652	-24.1724	26.1126	-32.2137	10.1516	133	101	9	16	392.1	31.3333
1380	30	11	142	20	14.5	1938	39.0652	-24.1724	26.1126	-32.2137	10.1516	133	101	9	16	344.3	34.9167
1381	30	11	142	20	10.9	2466	39.0652	-24.1724	26.1126	-32.2137	10.1516	133	101	9	16	396.6	29.6667
1382	30	11	122	22	17.5	2157	39.0652	-24.1724	26.1126	-32.2137	10.1516	133	101	9	16	341.4	34.9167
1383	30	11	147	24	15.7	2117	39.0652	-24.1724	26.1126	-32.2137	10.1516	133	101	9	16	344.3	34.9167
1384	30	11	142	16	7.8	2215	39.0652	-24.1724	26.1126	-32.2137	10.1516	133	101	9	16	399.8	31.3333
1385	30	11	142	16	7.3	1981	39.0652	-24.1724	26.1126	-32.2137	10.1516	133	101	9	16	345.2	31.3333
1386	30	11	52	8	5.3	2070	39.0652	-24.1724	26.1126	-32.2137	10.1516	133	101	9	16	341.4	34.9167
1387	30	11	142	18	12.5	2473	39.0652	-24.1724	26.1126	-32.2137	10.1516	133	101	9	16	359.7	35.1667
1388	30	11	137	20	14.1	1943	39.0652	-24.1724	26.1126	-32.2137	10.1516	133	101	9	16	344.3	34.9167
1389	30	11	122	26	17.8	1966	39.0652	-24.1724	26.1126	-32.2137	10.1516	133	101	9	16	337.1	34.9167
1390	30	11	122	20	17.1	2239	39.0652	-24.1724	26.1126	-32.2137	10.1516	133	101	9	16	361.4	34.9167
1391	30	11	142	18	13.2	2424	39.0652	-24.1724	26.1126	-32.2137	10.1516	133	101	9	16	425	31.3333
1392	30	11	142	18	12.5	2423	39.0652	-24.1724	26.1126	-32.2137	10.1516	133	101	9	16	398.4	27.25
1393	30	11	162	24	17	2336	39.0652	-24.1724	26.1126	-32.2137	10.1516	133	101	9	16	377.7	29.6667
1394	30	11	142	20	10.4	2460	39.0652	-24.1724	26.1126	-32.2137	10.1516	133	101	9	16	402.7	27.25
1395	30	11	152	20	14.1	2166	39.0652	-24.1724	26.1126	-32.2137	10.1516	133	101	9	16	365.4	35.1667
1396	30	11	112	16	12.8	2248	39.0652	-24.1724	26.1126	-32.2137	10.1516	133	101	9	16	354.4	34.9167
1397	30	11	77	12	9.9	2045	39.0652	-24.1724	26.1126	-32.2137	10.1516	133	101	9	16	341.4	34.9167
1398	30	11	142	18	12.9	2401	39.0652	-24.1724	26.1126	-32.2137	10.1516	133	101	9	16	365.4	35.1667
1399	30	11	112	16	12.6	1947	39.0652	-24.1724	26.1126	-32.2137	10.1516	133	101	9	16	354.4	34.9167
1400	30	11	152	16	10.2	2103	39.0652	-24.1724	26.1126	-32.2137	10.1516	133	101	9	16	370.7	31.3333
1401	30	11	142	20	9.4	2482	39.0652	-24.1724	26.1126	-32.2137	10.1516	133	101	9	16	435.6	27.25
1402	30	11	152	24	15.2	2238	39.0652	-24.1724	26.1126	-32.2137	10.1516	133	101	9	16	365.3	34.9167
1403	30	11	152	20	9.3	2551	39.0652	-24.1724	26.1126	-32.2137	10.1516	133	101	9	16	438.7	27.25
1404	30	11	137	24	15.6	2333	39.0652	-24.1724	26.1126	-32.2137	10.1516	133	101	9	16	361.4	34.9167
1405	30	11	122	18	14	2429	39.0652	-24.1724	26.1126	-32.2137	10.1516	133	101	9	16	396	29.6667
1406	30	11	92	14	11.5	2144	39.0652	-24.1724	26.1126	-32.2137	10.1516	133	101	9	16	337.1	34.9167
1407	30	11	127	24	16.7	2243	39.0652	-24.1724	26.1126	-32.2137	10.1516	133	101	9	16	376.2	29.6667
1408	30	11	152	24	15.2	2413	39.0652	-24.1724	26.1126	-32.2137	10.1516	133	101	9	16	396	29.6667
1409	30	11	112	16	13	2092	39.0652	-24.1724	26.1126	-32.2137	10.1516	133	101	9	16	365.5	34.9167
1410	30	11	142	20	13.5	2259	39.0652	-24.1724	26.1126	-32.2137	10.1516	133	101	9	16	365.5	34.9167
1411	30	11	142	18	12.4	2181	39.0652	-24.1724	26.1126	-32.2137	10.1516	133	101	9	16	361.4	34
1412	30	11	132	16	7.8	2225	39.0652	-24.1724	26.1126	-32.2137	10.1516	133	101	9	16	365.4	35.1667
1413	30	11	152	20	13.7	2234	38.793	-24.3254	26.0373	-32.519	10.094	134	102	7	16	361.4	34
1414	30	11	142	22	12.1	2124	39.0652	-24.1724	26.1126	-32.2137	10.1516	133	101	9	16	337.1	34.9167
1415	30	11	142	22	15.6	2013	39.0652	-24.1724	26.1126	-32.2137	10.1516	133	101	9	16	373.8	34.9167
1416	30	11	122	22	13	2434	39.0652	-24.1724	26.1126	-32.2137	10.1516	133	101	9	16	396	29.6667
1417	30	11	122	12	13.1	2093	39.0652	-24.1724	26.1126	-32.2137	10.1516	133	101	9	16	338.6	34.9167
1418	30	11	142	22	15.1	2389	39.0652	-24.1724	26.1126	-32.2137	10.1516	133	101	9	16	380.5	34.9167
1419	30	11	142	20	14.6	2291	38.793	-24.3254	26.0373	-32.519	10.094	134	102	7	16	361.4	34
1420	30	11	132	24	15.3	2464	39.0652	-24.1724	26.1126	-32.2137	10.1516	133	101	9	16	389.9	29.6667
1421	30	11	152	20	13.2	2302	39.0652	-24.1724	26.1126	-32.2137	10.1516	133	101	9	16	361.4	34.9167
1422	30	11	152	22	16.3	2412	39.0652	-24.1724	26.1126	-32.2137	10.1516	133	101	9	16	389.9	29.6667
1423	30	11	142	22	14.6	2342	39.0652	-24.1724	26.1126	-32.2137	10.1516	133	101	9	16	380.5	34.9167
1424	30	11	152	16	10.2	2263	39.0652	-24.1724	26.1126	-32.2137	10.1516	133	101	9	16	384.2	31.3333
1425	30	11	142	12	9.4	2248	39.0652	-24.1724	26.1126	-32.2137	10.1516	133	101	9	16	376.2	28.25
1426	30	11	102	12	6.4	2450	39.0652	-24.1724	26.1126	-32.2137	10.1516	133	101	9	16	394.3	18.9167
1427	30	11	142	14	6.2	2204	39.0652	-24.1724	26.1126	-32.2137	10.1516	133	101	9	16	372.9	28.25
1428	30	11	142	16	7.3	2030	39.0652	-24.1724	26.1126	-32.2137	10.1516	133	101	9	16	340.8	28.25
1429	30	11	142	24	15.2	2134	39.0652	-24.1724	26.1126	-32.2137	10.1516	133	101	9	16	351.8	34.9167
1430	30	11	137	18	12.9	2266	39.0652	-24.1724	26.1126	-32.2137	10.1516	133	101	9	16	373.8	23.5833
1431	30	11	152	22	16	2536	39.0652	-24.1724	26.1126	-32.2137	10.1516	133	101	9	16	389.9	29.6667
1432	30	11	152	22	15	2380	39.0652	-24.1724	26.1126	-32.2137	10.1516	133	101	9	16	380.5	34.9167
1433	30	11	122	16	7.4	2339	39.0652	-24.1724	26.1126	-32.2137	10.1516	133	101	9	16	382.9	18.9167
1434	30	11	142	22	15.2	2059	39.0652	-24.1724	26.1126	-32.2137	10.1516	133	101	9	16	373.8	23.5833
1435	30	11	142	12	7.3	2388	39.0652	-24.1724	26.1126	-32.2137	10.1516	133	101	9	16	382.9	28.25
1436	30	11	112	14	7.5	2366	39.0652	-24.1724	26.1126	-32.2137	10.1516	133	101	9	16	387.8	18.9167
1437	30	11	142	16	14	2302	39.0652	-24.1724	26.1126	-32.2137	10.1516	133	101	9	16	376.1	28.25
1438	30	11	152	22	14.4	2222	39.0652	-24.1724	26.1126	-32.2137	10.1516	133	101	9	16	351.8	23.5833
1439	30	11	142	20	12.5	2264	39.0652	-24.1724	26.1126	-32.2137	10.1516	133	101	9	16	380.6	23.5833
1440	30	11	142	16	6.2	2439	39.0652	-24.1724	26.1126	-32.2137	10.1516	133	101	9	16	387.8	18.9167
1441	30	11	147	20	10.3	2417	39.0652	-24.1724	26.1126	-32.2137	10.1516	133	101	9	16	375.6	18.5833
1442	30	11	122	16	6.4	2456	39.0652	-24.1724	26.1126	-32.2137	10.1516	133	101	9	16	394.3	18.9167
1443	30	11	142	18	13.2	2402	39.0652	-24.1724	26.1126	-32.2137	10.1516	133	101	9	16	358	21.75
1444	30	11	142	20	12.5	2058	39.0652	-24.1724	26.1126	-32.2137	10.1516	133	101	9	16	358.4	23.5833
1445	30	11	142	20	10.9	2147	39.0652	-24.1724	26.1126	-32.2137	10.1516	133	101	9	16	340.6	23.5833
1446	30	11	142	20	9.4	2287	39.0652	-24.1724	26.1126	-32.2137	10.1516	133	101	9	16	380.6	23.5833
1447	30	11	152	16	10.2	2279	39.0652	-24.1724	26.1126	-32.2137	10.1516	133	101	9	16	358	21.75
1448	30	11	142	20	10.4	2323	39.0652	-24.1724	26.1126	-32.2137	10.1516	133	101	9	16	380.6	23.5833
1449	30	11	142	18	11.4	2248	39.0652	-24.1724	26.1126	-32.2137	10.1516	133	101	9	16	332.8	28.25
1450	30	11	142	20	11.4	2118	39.0652	-24.1724	26.1126	-32.2137	10.1516	133	101	9	16	358.4	23.5833
1451	30	11	142	20	9.4	2326	39.0652	-24.1724	26.1126	-32.2137	10.1516	133	101	9	16	403.9	23.5833
1452	30	11	152	20	11.3	2188	39.0652	-24.1724	26.1126	-32.2137	10.1516	133	101	9	16	373.7	23.5833
1453	30	11	142	18	7.3	2608	39.0652	-24.1724	26.1126	-32.2137	10.1516	133	101	9	16	426	23.5833
1454	30	11	142	16	9.4	2312	39.0652	-24.1724	26.1126	-32.2137	10.1516	133	101	9	16	350.7	18.5833
1455	30	11	142	18	7.3	2385	39.0652	-24.1724	26.1126	-32.2137	10.1516	133	101	9	16	354.7	28.25
1456	30	11	122	16	8.5	2448	39.0652	-24.1724	26.1126	-32.2137	10.1516	133	101	9	16	402.7	23.5833
1457	30	11	132	20	13.8	2033	39.0652	-24.1724	26.1126	-32.2137	10.1516	133	101	9	16	373.7	23.5833
1458	30	11	142	18	6.2	2358	39.0652	-24.1724	26.1126	-32.2137	10.1516	133	101	9	16	364.8	28.25
1459	30	11	132	16	7.3	2511	39.0652	-24.1724	26.1126	-32.2137	10.1516	133	101	9	16	356.2	18.5833
1460	30	11	147	18	10.3	2456	39.0652	-24.1724	26.1126	-32.2137	10.1516	133	101	9	16	382.6	23.5833
1461	30	11	132	18	8.3	2104	39.0652	-24.1724	26.1126	-32.2137	10.1516	133	101	9	16	356.2	18.5833
1462	30	11	142	20	11.4	2377	39.0652	-24.1724	26.1126	-32.2137	10.1516	133	101	9	16	356.2	18.5833
1463	30	11	147	20	11.3	2420	39.0652	-24.1724	26.1126	-32.2137	10.1516	133	101	9	16	359.2	18.5833
1464	30	11	147	18	10.3	2282	39.0652	-24.1724	26.1126	-32.2137	10.1516	133	101	9	16	397	18.5833
1465	30	11	142	18	12.5	2324	39.0652	-24.1724	26.1126	-32.2137	10.1516	133	101	9	16	374.4	15
1466	30	11	142	18	10.4	2620	39.0652	-24.1724	26.1126	-32.2137	10.1516	133	101	9	16	374.4	15
1467	30	11	142	18	12.5	2399	39.0652	-24.1724	26.1126	-32.2137	10.1516	133	101	9	16	416.3	15
1468	30	11	142	18	13.2	2488	39.0652	-24.1724	26.1126	-32.2137	10.1516	133	101	9	16	361	23.4167
1469	30	11	142	18	13.2	2202	39.0652	-24.1724	26.1126	-32.2137	10.1516	133	101	9	16	350.4	23.4167
1470	30	11	142	18	11.4	2282	37.6918	-25.2006	24.6196	-33.6315	10.4008	121	105	7	16	339.3	19.9167
1471	30	11	142	18	11.4	2399	37.6918	-25.2006	24.6196	-33.6315	10.4008	121	105	7	16	339.3	19.9167
1472	30	11	122	22	16	1695	36.195	-23.5393	23.0574	-32.7693	10.7191	106	106	8	13	265.4	-9999
1473	30	11	122	26	18	1872	36.195	-23.5393	23.0574	-32.7693	10.7191	106	106	8	13		-9999
1474	310	13	57	24	16.4	1138	38.6883	-24.1893	25.2281	-34.072	11.1573	130	103	7	15	219.1	77.5
1475	310	13	67	30	14.7	1116	38.6866	-24.2904	25.3723	-33.8814	10.918	133	102	6	15	229	71.5833
1476	30	11	22	8	5.4	1097	38.6866	-24.2904	25.3723	-33.8814	10.918	133	102	6	15	224.5	79.25
1477	310	13	67	22	13.7	1100	38.6866	-24.2904	25.3723	-33.8814	10.918	133	102	6	15	224.5	78.3333
1478	310	13	57	28	13.1	1165	38.6883	-24.1893	25.2281	-34.072	11.1573	130	103	7	15	215.6	77.5
1479	310	13	57	30	14.2	1122	38.6866	-24.2904	25.3723	-33.8814	10.918	133	102	6	15	233.3	71.5833
1480	310	13	57	22	15.3	1110	38.6866	-24.2904	25.3723	-33.8814	10.918	133	102	6	15	222.4	73.3333
1481	310	13	57	20	13.1	1117	38.6866	-24.2904	25.3723	-33.8814	10.918	133	102	6	15	222.4	73.3333
1482	30	11	32	14	10	1119	38.6866	-24.2904	25.3723	-33.8814	10.918	133	102	6	15	222.4	73.3333
1483	310	13	57	28	15.3	1157	38.6883	-24.1893	25.2281	-34.072	11.1573	130	103	7	15	221.5	75.5
1484	30	11	32	14	10	1125	38.6866	-24.2904	25.3723	-33.8814	10.918	133	102	6	15	229	73.3333
1485	30	11	32	14	10	1131	38.6866	-24.2904	25.3723	-33.8814	10.918	133	102	6	15	229	73.3333
1486	310	13	57	28	10.6	1201	38.6866	-24.2904	25.3723	-33.8814	10.918	133	102	6	15	239.2	71.5833
1487	310	13	52	28	13	1264	38.6866	-24.2904	25.3723	-33.8814	10.918	133	102	6	15	238.3	71.5833
1488	310	13	57	28	13.1	1151	38.6866	-24.2904	25.3723	-33.8814	10.918	133	102	6	15	232.5	73.3333
1489	310	13	52	32	13	1282	38.6866	-24.2904	25.3723	-33.8814	10.918	133	102	6	15	247.6	68.8333
1490	310	13	57	26	16.4	1176	38.6883	-24.1893	25.2281	-34.072	11.1573	130	103	7	15	230.6	75.5
1491	310	13	57	32	14.2	1280	38.6866	-24.2904	25.3723	-33.8814	10.918	133	102	6	15	247.6	68.8333
1492	310	13	57	30	15.3	1172	38.6866	-24.2904	25.3723	-33.8814	10.918	133	102	6	15	232.5	73.3333
1493	310	13	57	32	16.4	1200	38.6883	-24.1893	25.2281	-34.072	11.1573	130	103	7	15	229	75.5
1494	310	13	72	28	14	1188	38.6883	-24.1893	25.2281	-34.072	11.1573	130	103	7	15	230.6	75.5
1495	310	13	52	24	10	1317	38.6866	-24.2904	25.3723	-33.8814	10.918	133	102	6	15	240.3	71.5833
1496	310	13	57	26	13.1	1200	38.6883	-24.1893	25.2281	-34.072	11.1573	130	103	7	15	235.8	75.5
1497	310	13	67	28	13.7	1197	38.6883	-24.1893	25.2281	-34.072	11.1573	130	103	7	15	235.8	75.5
1498	310	13	67	30	13.7	1201	38.6883	-24.1893	25.2281	-34.072	11.1573	130	103	7	15	235.8	75.5
1499	310	13	67	26	11.6	1217	38.6883	-24.1893	25.2281	-34.072	11.1573	130	103	7	15	235.8	75.5
1500	310	13	67	28	12.6	1219	38.6883	-24.1893	25.2281	-34.072	11.1573	130	103	7	15	235.8	75.5
1501	263	13	57	24	13.1	1156	38.6089	-24.3569	25.7464	-33.1355	10.385	134	102	6	15	229.3	75.1667
1502	310	13	67	30	13.7	1224	38.6883	-24.1893	25.2281	-34.072	11.1573	130	103	7	15	233.9	75.5
1503	30	11	87	14	9.4	1659	38.6866	-24.2904	25.3723	-33.8814	10.918	133	102	6	15	274.3	68.8333
1504	30	11	137	28	17.3	1631	38.6089	-24.3569	25.7464	-33.1355	10.385	134	102	6	15	264.6	74.5
1505	30	11	67	12	7.4	1690	37.2719	-23.9046	24.2738	-32.9479	10.5641	120	104	7	14	278.3	68.8333
1506	30	11	137	26	16.3	1654	37.9731	-24.1561	25.2022	-32.7559	10.2748	128	103	6	15	268.1	74.5
1507	30	11	67	12	8.4	1595	37.2719	-23.9046	24.2738	-32.9479	10.5641	120	104	7	14	278.3	46.0833
1508	30	11	157	30	18.2	1660	37.9731	-24.1561	25.2022	-32.7559	10.2748	128	103	6	15	268.1	55.1667
1509	30	11	67	14	10.5	1559	37.2719	-23.9046	24.2738	-32.9479	10.5641	120	104	7	14	264.6	46.0833
1510	30	11	152	28	18.4	1920	37.2719	-23.9046	24.2738	-32.9479	10.5641	120	104	7	14	279.8	46.0833
1511	30	11	67	14	11.6	1559	37.2719	-23.9046	24.2738	-32.9479	10.5641	120	104	7	14	264.6	46.0833
1512	310	13	67	28	12.6	1253	36.195	-23.5393	23.0574	-32.7693	10.7191	106	106	8	13	239.1	68.9167
1513	30	11	137	26	20.4	1472	37.2719	-23.9046	24.2738	-32.9479	10.5641	120	104	7	14	253.7	50.25
1514	30	11	117	24	18.5	1599	37.2719	-23.9046	24.2738	-32.9479	10.5641	120	104	7	14	266.6	48.5
1515	30	11	112	22	18.5	1543	37.2719	-23.9046	24.2738	-32.9479	10.5641	120	104	7	14	275.6	50.25
1516	30	11	132	28	20.4	1869	37.2719	-23.9046	24.2738	-32.9479	10.5641	120	104	7	14	282.9	46.0833
1517	30	11	127	28	21.4	1473	37.2719	-23.9046	24.2738	-32.9479	10.5641	120	104	7	14	261.4	48.5
1518	30	11	117	20	17.5	1827	37.2719	-23.9046	24.2738	-32.9479	10.5641	120	104	7	14	282.7	50.25
1519	30	11	132	26	19.4	1872	37.2719	-23.9046	24.2738	-32.9479	10.5641	120	104	7	14	282.9	46.0833
1520	30	11	142	24	17	1478	37.2719	-23.9046	24.2738	-32.9479	10.5641	120	104	7	14	264.5	50.25
1521	30	11	127	24	20.4	1668	37.2719	-23.9046	24.2738	-32.9479	10.5641	120	104	7	14	275.6	50.25
1522	30	11	147	30	21.4	1782	37.2719	-23.9046	24.2738	-32.9479	10.5641	120	104	7	14	282.9	46.0833
1523	30	11	132	22	17.3	1678	37.2719	-23.9046	24.2738	-32.9479	10.5641	120	104	7	14	279.1	50.25
1524	30	11	117	24	18.5	1723	37.2719	-23.9046	24.2738	-32.9479	10.5641	120	104	7	14	255.7	50.25
1525	30	11	57	12	8.5	1588	37.2719	-23.9046	24.2738	-32.9479	10.5641	120	104	7	14	256	48.5
1526	30	11	117	26	18.5	1533	37.2719	-23.9046	24.2738	-32.9479	10.5641	120	104	7	14	257.9	53.3333
1527	30	11	132	26	19.4	1799	37.2719	-23.9046	24.2738	-32.9479	10.5641	120	104	7	14	282.2	50.25
1528	30	11	137	26	22.4	1831	37.2719	-23.9046	24.2738	-32.9479	10.5641	120	104	7	14	282.2	50.25
1529	30	11	122	28	18.5	1762	37.2719	-23.9046	24.2738	-32.9479	10.5641	120	104	7	14	275.3	48.5
1530	30	11	117	30	20.6	1559	37.2719	-23.9046	24.2738	-32.9479	10.5641	120	104	7	14	267.9	48.5
1531	30	11	122	20	14.4	1700	37.2719	-23.9046	24.2738	-32.9479	10.5641	120	104	7	14	280.4	50.75
1532	30	11	122	22	16.5	1815	37.2719	-23.9046	24.2738	-32.9479	10.5641	120	104	7	14	275.4	50.75
1533	30	11	132	26	20.4	1916	37.2719	-23.9046	24.2738	-32.9479	10.5641	120	104	7	14	282.9	46.0833
1534	30	11	137	24	18.4	1836	37.2719	-23.9046	24.2738	-32.9479	10.5641	120	104	7	14	282.2	50.25
1535	30	11	122	20	15.5	1761	37.2719	-23.9046	24.2738	-32.9479	10.5641	120	104	7	14	280.4	50.75
1536	30	11	132	28	20.4	1820	37.2719	-23.9046	24.2738	-32.9479	10.5641	120	104	7	14	279.1	50.25
1537	30	11	57	10	8.5	1682	37.2719	-23.9046	24.2738	-32.9479	10.5641	120	104	7	14	260.3	48.5
1538	30	11	47	10	6.4	1640	37.2719	-23.9046	24.2738	-32.9479	10.5641	120	104	7	14	260.3	48.5
1539	30	11	132	22	19.4	1882	37.2719	-23.9046	24.2738	-32.9479	10.5641	120	104	7	14	282.2	46.0833
1540	30	11	117	26	19.6	1604	37.2719	-23.9046	24.2738	-32.9479	10.5641	120	104	7	14	265.6	48.5
1541	30	11	32	14	7.5	1590	37.2719	-23.9046	24.2738	-32.9479	10.5641	120	104	7	14	259	48.5
1542	30	11	112	22	17.5	1841	37.2719	-23.9046	24.2738	-32.9479	10.5641	120	104	7	14	282.7	50.25
1543	30	11	112	18	14.4	1642	37.2719	-23.9046	24.2738	-32.9479	10.5641	120	104	7	14	260.7	50.75
1544	30	11	117	24	18.5	1716	37.2719	-23.9046	24.2738	-32.9479	10.5641	120	104	7	14	278.4	48.5
1545	30	11	117	22	17.5	1704	37.2719	-23.9046	24.2738	-32.9479	10.5641	120	104	7	14	270.7	53.3333
1546	30	11	132	22	19.4	1935	37.2719	-23.9046	24.2738	-32.9479	10.5641	120	104	7	14	282.2	46.0833
1547	30	11	97	20	16.6	1924	37.2719	-23.9046	24.2738	-32.9479	10.5641	120	104	7	14	282.7	50.25
1548	30	11	123	28	22.7	1599	37.2719	-23.9046	24.2738	-32.9479	10.5641	120	104	7	14	262.1	53.3333
1549	30	11	37	10	7.5	1708	37.2719	-23.9046	24.2738	-32.9479	10.5641	120	104	7	14	260.3	48.5
1550	30	11	147	28	21.4	1973	37.2719	-23.9046	24.2738	-32.9479	10.5641	120	104	7	14	282.9	46.0833
1551	30	11	122	22	20.6	1690	37.2719	-23.9046	24.2738	-32.9479	10.5641	120	104	7	14	268.7	53.3333
1552	30	11	112	28	19.6	1738	37.2719	-23.9046	24.2738	-32.9479	10.5641	120	104	7	14	273.5	48.5
1553	30	11	142	28	22.4	1969	37.2719	-23.9046	24.2738	-32.9479	10.5641	120	104	7	14	292.8	46.0833
1554	30	11	147	28	22.4	1994	37.2719	-23.9046	24.2738	-32.9479	10.5641	120	104	7	14	282.9	46.0833
1555	30	11	137	28	20.4	1699	37.2719	-23.9046	24.2738	-32.9479	10.5641	120	104	7	14	267.9	48.5
1556	30	11	92	20	15.6	1906	37.2719	-23.9046	24.2738	-32.9479	10.5641	120	104	7	14	271.2	50.75
1557	30	11	92	28	19.8	1700	37.2719	-23.9046	24.2738	-32.9479	10.5641	120	104	7	14	271.2	50.75
1558	30	11	112	22	17.5	1883	37.2719	-23.9046	24.2738	-32.9479	10.5641	120	104	7	14	276.7	48.5
1559	30	11	147	30	21.4	2043	37.2719	-23.9046	24.2738	-32.9479	10.5641	120	104	7	14	292.8	46.0833
1560	30	11	97	20	15.6	1752	37.2719	-23.9046	24.2738	-32.9479	10.5641	120	104	7	14	276.7	48.5
1561	30	11	127	30	20.4	1733	37.2719	-23.9046	24.2738	-32.9479	10.5641	120	104	7	14	268.7	53.3333
1562	30	11	117	24	16.5	1761	37.2719	-23.9046	24.2738	-32.9479	10.5641	120	104	7	14	271.1	48.5
1563	30	11	132	22	18.4	1879	37.2719	-23.9046	24.2738	-32.9479	10.5641	120	104	7	14	290.3	50.25
1564	30	11	107	20	16.5	1769	37.2719	-23.9046	24.2738	-32.9479	10.5641	120	104	7	14	262.7	53.3333
1565	30	11	137	22	20.4	1912	37.2719	-23.9046	24.2738	-32.9479	10.5641	120	104	7	14	282.4	50.25
1566	30	11	132	28	17.3	1676	37.2719	-23.9046	24.2738	-32.9479	10.5641	120	104	7	14	260.9	50.75
1567	30	11	87	16	12.5	1768	37.2719	-23.9046	24.2738	-32.9479	10.5641	120	104	7	14	263	50.25
1568	30	11	117	24	19.6	1782	37.2719	-23.9046	24.2738	-32.9479	10.5641	120	104	7	14	271.7	48.5
1569	30	11	37	6	5.4	1704	37.2719	-23.9046	24.2738	-32.9479	10.5641	120	104	7	14	267	48.5
1570	30	11	127	22	18.4	1952	37.2719	-23.9046	24.2738	-32.9479	10.5641	120	104	7	14	290.3	50.25
1571	30	11	97	28	18.7	1694	37.2719	-23.9046	24.2738	-32.9479	10.5641	120	104	7	14	271.1	48.5
1572	30	11	152	24	19.4	1771	37.2719	-23.9046	24.2738	-32.9479	10.5641	120	104	7	14	269.8	48.5
1573	30	11	117	26	20.6	1772	37.2719	-23.9046	24.2738	-32.9479	10.5641	120	104	7	14	267	48.5
1574	30	11	117	20	15.5	1853	37.2719	-23.9046	24.2738	-32.9479	10.5641	120	104	7	14	289.2	50.75
1575	30	11	132	22	18.4	1954	37.2719	-23.9046	24.2738	-32.9479	10.5641	120	104	7	14	282.4	50.25
1576	30	11	117	26	17.5	1741	37.2719	-23.9046	24.2738	-32.9479	10.5641	120	104	7	14	270.7	53.3333
1577	30	11	107	22	17.5	1710	37.2719	-23.9046	24.2738	-32.9479	10.5641	120	104	7	14	267	48.5
1578	30	11	107	20	16.5	1714	37.2719	-23.9046	24.2738	-32.9479	10.5641	120	104	7	14	262.7	53.3333
1579	30	11	97	20	16.6	1892	37.2719	-23.9046	24.2738	-32.9479	10.5641	120	104	7	14	280.9	50.25
1580	30	11	137	30	18.4	1852	37.2719	-23.9046	24.2738	-32.9479	10.5641	120	104	7	14	273.5	48.5
1581	30	11	137	28	18.4	1791	37.2719	-23.9046	24.2738	-32.9479	10.5641	120	104	7	14	271.2	50.75
1582	30	11	117	20	14.4	1816	37.2719	-23.9046	24.2738	-32.9479	10.5641	120	104	7	14	289.2	50.75
1583	30	11	147	28	19.4	1879	37.2719	-23.9046	24.2738	-32.9479	10.5641	120	104	7	14	292.1	48.5
1584	30	11	97	20	14.6	1918	37.2719	-23.9046	24.2738	-32.9479	10.5641	120	104	7	14	276.7	48.5
1585	30	11	117	30	19.6	1962	37.2719	-23.9046	24.2738	-32.9479	10.5641	120	104	7	14	288.8	48.5
1586	30	11	137	24	19.4	2008	37.2719	-23.9046	24.2738	-32.9479	10.5641	120	104	7	14	282.4	46.0833
1587	30	11	127	30	16.3	2002	37.2719	-23.9046	24.2738	-32.9479	10.5641	120	104	7	14	288.8	48.5
1588	30	11	132	26	19.4	1973	37.2719	-23.9046	24.2738	-32.9479	10.5641	120	104	7	14	293.7	50.25
1589	30	11	107	22	17.5	1855	37.2719	-23.9046	24.2738	-32.9479	10.5641	120	104	7	14	282.6	48.5
1590	30	11	82	22	17.9	1797	37.2719	-23.9046	24.2738	-32.9479	10.5641	120	104	7	14	271.1	48.5
1591	30	11	127	26	18.4	1920	37.2719	-23.9046	24.2738	-32.9479	10.5641	120	104	7	14	282.6	27.75
1592	30	11	97	20	16.6	1775	37.2719	-23.9046	24.2738	-32.9479	10.5641	120	104	7	14	276	53.3333
1593	30	11	132	26	21.4	1920	37.2719	-23.9046	24.2738	-32.9479	10.5641	120	104	7	14	296.1	48.5
1594	30	11	112	22	17.5	1847	37.2719	-23.9046	24.2738	-32.9479	10.5641	120	104	7	14	277.3	48.5
1595	30	11	117	20	15.5	1741	37.2719	-23.9046	24.2738	-32.9479	10.5641	120	104	7	14	273.3	50.75
1596	30	11	117	24	17.5	2072	37.2719	-23.9046	24.2738	-32.9479	10.5641	120	104	7	14	296.1	48.5
1597	30	11	97	20	14.6	2041	37.2719	-23.9046	24.2738	-32.9479	10.5641	120	104	7	14	297.8	48.5
1598	30	11	137	26	19.4	2061	37.2719	-23.9046	24.2738	-32.9479	10.5641	120	104	7	14	296.8	46.0833
1599	30	11	97	20	16.6	1690	36.195	-23.5393	23.0574	-32.7693	10.7191	106	106	8	13	261.8	62.9167
1600	30	11	77	18	13.7	1782	37.2719	-23.9046	24.2738	-32.9479	10.5641	120	104	7	14	269.1	50.25
1601	30	11	117	28	18.5	2039	37.2719	-23.9046	24.2738	-32.9479	10.5641	120	104	7	14	288.8	48.5
1602	30	11	117	22	15.5	1662	37.2719	-23.9046	24.2738	-32.9479	10.5641	120	104	7	14	281.8	50.75
1603	30	11	97	26	18.7	2248	37.2719	-23.9046	24.2738	-32.9479	10.5641	120	104	7	14	288.8	27.75
1604	30	11	97	20	16.6	1706	36.195	-23.5393	23.0574	-32.7693	10.7191	106	106	8	13	273.4	62.9167
1605	30	11	112	20	14.4	1635	37.2719	-23.9046	24.2738	-32.9479	10.5641	120	104	7	14	271	50.75
1606	30	11	112	20	15.5	1703	37.2719	-23.9046	24.2738	-32.9479	10.5641	120	104	7	14	271	31.8333
1607	30	11	132	28	18.4	1894	37.2719	-23.9046	24.2738	-32.9479	10.5641	120	104	7	14	276.9	50.75
1608	30	11	137	24	16.3	1798	37.2719	-23.9046	24.2738	-32.9479	10.5641	120	104	7	14	281.8	50.75
1609	30	11	92	18	12.5	1613	37.2719	-23.9046	24.2738	-32.9479	10.5641	120	104	7	14	256.8	35.6667
1610	30	11	107	20	15.5	2216	37.2719	-23.9046	24.2738	-32.9479	10.5641	120	104	7	14	293.1	27.75
1611	30	11	32	10	6.4	1540	37.2719	-23.9046	24.2738	-32.9479	10.5641	120	104	7	14	250.6	53.3333
1612	30	11	105	20	16.5	1756	37.2719	-23.9046	24.2738	-32.9479	10.5641	120	104	7	14	281.8	50.75
1613	30	11	137	28	17.3	1897	37.2719	-23.9046	24.2738	-32.9479	10.5641	120	104	7	14	268.6	31.8333
1614	30	11	127	28	21.4	1952	37.2719	-23.9046	24.2738	-32.9479	10.5641	120	104	7	14	283.3	27.75
1615	30	11	142	24	19.4	2106	37.2719	-23.9046	24.2738	-32.9479	10.5641	120	104	7	14	296.8	29.1667
1616	30	11	115	20	18.5	1904	37.2719	-23.9046	24.2738	-32.9479	10.5641	120	104	7	14	281.8	31.8333
1617	30	11	97	18	15.6	1763	37.2719	-23.9046	24.2738	-32.9479	10.5641	120	104	7	14	271.8	40.6667
1618	30	11	127	28	21.4	1730	37.2719	-23.9046	24.2738	-32.9479	10.5641	120	104	7	14	269.1	34.25
1619	30	11	97	20	15.6	1639	37.2719	-23.9046	24.2738	-32.9479	10.5641	120	104	7	14	266.9	40.6667
1620	30	11	112	26	19.6	1756	37.2719	-23.9046	24.2738	-32.9479	10.5641	120	104	7	14	268	35.6667
1621	30	11	117	24	18.5	2244	37.2719	-23.9046	24.2738	-32.9479	10.5641	120	104	7	14	297.8	27.75
1622	30	11	107	26	17.5	1831	36.195	-23.5393	23.0574	-32.7693	10.7191	106	106	8	13	271.8	40.6667
1623	30	11	97	20	16.6	1806	36.195	-23.5393	23.0574	-32.7693	10.7191	106	106	8	13	265.7	40.75
1624	30	11	117	22	15.5	1977	37.2719	-23.9046	24.2738	-32.9479	10.5641	120	104	7	14	291.7	31.8333
1625	30	11	142	24	19	1541	37.2719	-23.9046	24.2738	-32.9479	10.5641	120	104	7	14	265.2	31.8333
1626	30	11	117	24	17.5	2034	37.2719	-23.9046	24.2738	-32.9479	10.5641	120	104	7	14	286.2	27.75
1627	30	11	112	26	18.5	1913	37.2719	-23.9046	24.2738	-32.9479	10.5641	120	104	7	14	276	35.6667
1628	30	11	167	36	23.2	2000	37.2719	-23.9046	24.2738	-32.9479	10.5641	120	104	7	14	298.8	34.25
1629	30	11	147	34	23.5	1747	37.2719	-23.9046	24.2738	-32.9479	10.5641	120	104	7	14	276.8	34.25
1630	30	11	132	26	18.4	2121	37.2719	-23.9046	24.2738	-32.9479	10.5641	120	104	7	14	292.1	27.75
1631	30	11	72	16	15.8	1772	36.195	-23.5393	23.0574	-32.7693	10.7191	106	106	8	13	261.1	51.3333
1632	30	11	147	24	20.4	2048	37.2719	-23.9046	24.2738	-32.9479	10.5641	120	104	7	14	298.8	29.1667
1633	30	11	147	32	21.4	1946	37.2719	-23.9046	24.2738	-32.9479	10.5641	120	104	7	14	287.3	34.25
1634	30	11	137	30	20.4	2135	37.2719	-23.9046	24.2738	-32.9479	10.5641	120	104	7	14	296.8	29.1667
1635	30	11	97	20	16.6	1848	36.195	-23.5393	23.0574	-32.7693	10.7191	106	106	8	13	273.4	40.75
1636	30	11	77	18	16.8	1656	36.195	-23.5393	23.0574	-32.7693	10.7191	106	106	8	13	268.5	51.3333
1637	30	11	117	22	16.5	2037	37.2719	-23.9046	24.2738	-32.9479	10.5641	120	104	7	14	285.3	31.8333
1638	30	11	72	16	12.6	1770	36.195	-23.5393	23.0574	-32.7693	10.7191	106	106	8	13	261.8	51.3333
1639	30	11	102	20	14.6	1690	37.2719	-23.9046	24.2738	-32.9479	10.5641	120	104	7	14	271	31.8333
1640	30	11	117	24	19.6	1951	37.2719	-23.9046	24.2738	-32.9479	10.5641	120	104	7	14	274.8	27.75
1641	30	11	57	16	11.7	1817	36.195	-23.5393	23.0574	-32.7693	10.7191	106	106	8	13	261.1	40.75
1642	30	11	137	32	22.4	2101	37.2719	-23.9046	24.2738	-32.9479	10.5641	120	104	7	14	299.4	29.1667
1643	30	11	137	28	22.4	2209	37.2719	-23.9046	24.2738	-32.9479	10.5641	120	104	7	14	309.9	27.75
1644	30	11	107	22	17.5	1886	36.195	-23.5393	23.0574	-32.7693	10.7191	106	106	8	13	267	40.75
1645	30	11	157	28	20.2	2135	37.2719	-23.9046	24.2738	-32.9479	10.5641	120	104	7	14	311.8	27.75
1646	30	11	92	24	19.8	1823	36.195	-23.5393	23.0574	-32.7693	10.7191	106	106	8	13	275.5	40.75
1647	30	11	117	22	15.5	1865	37.2719	-23.9046	24.2738	-32.9479	10.5641	120	104	7	14	279	31.8333
1648	310	13	62	24	18	1599	37.2719	-23.9046	24.2738	-32.9479	10.5641	120	104	7	14	265.2	31.8333
1649	30	11	132	28	17.3	1991	37.2719	-23.9046	24.2738	-32.9479	10.5641	120	104	7	14	285.3	31.8333
1650	30	11	117	22	15.5	1735	37.2719	-23.9046	24.2738	-32.9479	10.5641	120	104	7	14	279	31.8333
1651	30	11	137	30	21.4	2148	37.2719	-23.9046	24.2738	-32.9479	10.5641	120	104	7	14	299.4	29.1667
1652	30	11	147	32	22.4	2009	37.2719	-23.9046	24.2738	-32.9479	10.5641	120	104	7	14	285.6	34.25
1653	30	11	87	20	17.7	1710	36.195	-23.5393	23.0574	-32.7693	10.7191	106	106	8	13	272.3	51.3333
1654	30	11	102	22	19.8	1763	36.195	-23.5393	23.0574	-32.7693	10.7191	106	106	8	13	270.9	51.3333
1655	30	11	157	30	21.2	2235	37.2719	-23.9046	24.2738	-32.9479	10.5641	120	104	7	14	304.8	27.75
1656	30	11	87	18	16.6	1699	36.195	-23.5393	23.0574	-32.7693	10.7191	106	106	8	13	268.5	51.3333
1657	30	11	127	26	20.4	1703	37.2719	-23.9046	24.2738	-32.9479	10.5641	120	104	7	14	258.9	35.6667
1658	310	13	62	22	16	1449	37.2719	-23.9046	24.2738	-32.9479	10.5641	120	104	7	14	248	40.6667
1659	30	11	147	32	22.4	1868	37.2719	-23.9046	24.2738	-32.9479	10.5641	120	104	7	14	285.6	34.25
1660	30	11	117	22	16.5	2110	37.2719	-23.9046	24.2738	-32.9479	10.5641	120	104	7	14	285.3	31.8333
1661	30	11	87	20	17.7	1802	36.195	-23.5393	23.0574	-32.7693	10.7191	106	106	8	13	272.4	51.3333
1662	30	11	137	26	20.4	1896	37.2719	-23.9046	24.2738	-32.9479	10.5641	120	104	7	14	274.8	35.6667
1663	30	11	132	28	17.3	1895	37.2719	-23.9046	24.2738	-32.9479	10.5641	120	104	7	14	275.7	31.8333
1664	30	11	137	28	17.3	1929	37.2719	-23.9046	24.2738	-32.9479	10.5641	120	104	7	14	275.7	31.8333
1665	30	11	132	22	18.4	1742	37.2719	-23.9046	24.2738	-32.9479	10.5641	120	104	7	14	288	34.25
1666	30	11	97	20	16.6	1845	36.195	-23.5393	23.0574	-32.7693	10.7191	106	106	8	13	274.6	40.75
1667	30	11	87	18	14.6	1648	37.2719	-23.9046	24.2738	-32.9479	10.5641	120	104	7	14	245.3	35.6667
1668	30	11	147	32	20.4	1998	37.2719	-23.9046	24.2738	-32.9479	10.5641	120	104	7	14	290.8	34.25
1669	30	11	97	20	18.7	1795	36.195	-23.5393	23.0574	-32.7693	10.7191	106	106	8	13	272.3	51.3333
1670	310	13	62	22	15	1506	37.2719	-23.9046	24.2738	-32.9479	10.5641	120	104	7	14	263.9	40.6667
1671	30	11	142	30	20.4	2091	37.2719	-23.9046	24.2738	-32.9479	10.5641	120	104	7	14	290.8	34.25
1672	30	11	137	26	17.3	1661	37.2719	-23.9046	24.2738	-32.9479	10.5641	120	104	7	14	270.2	34.25
1673	30	11	77	16	12.6	1494	37.2719	-23.9046	24.2738	-32.9479	10.5641	120	104	7	14	253.8	40.6667
1674	30	11	147	34	21.4	2109	37.2719	-23.9046	24.2738	-32.9479	10.5641	120	104	7	14	298.8	34.25
1675	30	11	127	24	16.3	1820	37.2719	-23.9046	24.2738	-32.9479	10.5641	120	104	7	14	270.1	34.25
1676	30	11	117	24	17.5	1607	37.2719	-23.9046	24.2738	-32.9479	10.5641	120	104	7	14	265.2	31.8333
1677	30	11	122	22	14.4	1573	37.2719	-23.9046	24.2738	-32.9479	10.5641	120	104	7	14	263.9	40.6667
1678	30	11	97	22	17.7	1729	36.195	-23.5393	23.0574	-32.7693	10.7191	106	106	8	13	272	40.75
1679	30	11	132	24	17	2196	37.2719	-23.9046	24.2738	-32.9479	10.5641	120	104	7	14	299.4	29.1667
1680	30	11	142	32	20.4	2232	37.2719	-23.9046	24.2738	-32.9479	10.5641	120	104	7	14	299.4	29.1667
1681	30	11	132	26	17.3	2237	37.2719	-23.9046	24.2738	-32.9479	10.5641	120	104	7	14	304.8	27.75
1682	30	11	97	20	16.6	1849	36.195	-23.5393	23.0574	-32.7693	10.7191	106	106	8	13	271.9	40.75
1683	30	11	137	28	21.4	2225	37.2719	-23.9046	24.2738	-32.9479	10.5641	120	104	7	14	298.8	34.25
1684	30	11	137	26	21.4	1880	37.2719	-23.9046	24.2738	-32.9479	10.5641	120	104	7	14	266.9	35.6667
1685	30	11	32	10	7.5	1806	37.2719	-23.9046	24.2738	-32.9479	10.5641	120	104	7	14	266.9	35.6667
1686	30	11	117	22	18.5	1935	36.195	-23.5393	23.0574	-32.7693	10.7191	106	106	8	13	279.1	51.3333
1687	30	11	117	22	15.5	1883	37.2719	-23.9046	24.2738	-32.9479	10.5641	120	104	7	14	272.6	40.6667
1688	30	11	142	28	18.4	2309	37.2719	-23.9046	24.2738	-32.9479	10.5641	120	104	7	14	304.8	27.75
1689	30	11	87	16	14.6	1958	37.2719	-23.9046	24.2738	-32.9479	10.5641	120	104	7	14	296.3	27.75
1690	30	11	87	20	15.6	1734	37.2719	-23.9046	24.2738	-32.9479	10.5641	120	104	7	14	267.6	40.6667
1691	30	11	77	16	13.7	1862	36.195	-23.5393	23.0574	-32.7693	10.7191	106	106	8	13	271.9	40.75
1692	310	13	62	40	16	1343	36.195	-23.5393	23.0574	-32.7693	10.7191	106	106	8	13	248	49.1667
1693	30	11	47	16	11.4	2238	37.2719	-23.9046	24.2738	-32.9479	10.5641	120	104	7	14	311.8	27.75
1694	30	11	137	28	25.5	2021	37.2719	-23.9046	24.2738	-32.9479	10.5641	120	104	7	14	296.3	27.75
1695	30	11	117	22	17.5	2071	37.2719	-23.9046	24.2738	-32.9479	10.5641	120	104	7	14	285.3	31.8333
1696	30	11	122	20	15.5	2020	37.2719	-23.9046	24.2738	-32.9479	10.5641	120	104	7	14	291.7	31.8333
1697	30	11	147	22	16.3	1826	37.2719	-23.9046	24.2738	-32.9479	10.5641	120	104	7	14	264.2	35.6667
1698	310	13	42	30	16	1382	36.195	-23.5393	23.0574	-32.7693	10.7191	106	106	8	13	248	49.1667
1699	30	11	87	18	15.6	1754	36.195	-23.5393	23.0574	-32.7693	10.7191	106	106	8	13	272	40.75
1700	30	11	157	36	22.2	2390	37.2719	-23.9046	24.2738	-32.9479	10.5641	120	104	7	14	323.6	29.1667
1701	30	11	127	32	20.4	2487	37.2719	-23.9046	24.2738	-32.9479	10.5641	120	104	7	14	313.8	27.75
1702	30	11	132	26	20.4	2003	36.195	-23.5393	23.0574	-32.7693	10.7191	106	106	8	13	279.1	40.75
1703	30	11	117	20	15.5	2138	37.2719	-23.9046	24.2738	-32.9479	10.5641	120	104	7	14	302.6	27.75
1704	30	11	47	6	6.4	1830	37.2719	-23.9046	24.2738	-32.9479	10.5641	120	104	7	14	275.7	31.8333
1705	30	11	127	26	20.4	1921	37.2719	-23.9046	24.2738	-32.9479	10.5641	120	104	7	14	286.2	27.75
1706	30	11	37	6	5.4	1853	37.2719	-23.9046	24.2738	-32.9479	10.5641	120	104	7	14	275.7	31.8333
1707	30	11	127	26	17.3	1967	37.2719	-23.9046	24.2738	-32.9479	10.5641	120	104	7	14	291.2	27.75
1708	30	11	137	26	20.4	2292	37.2719	-23.9046	24.2738	-32.9479	10.5641	120	104	7	14	316.3	29.1667
1709	30	11	122	24	16.5	2059	37.2719	-23.9046	24.2738	-32.9479	10.5641	120	104	7	14	291.7	31.8333
1710	30	11	112	22	15	1761	36.195	-23.5393	23.0574	-32.7693	10.7191	106	106	8	13	274.6	40.75
1711	30	11	112	30	17.5	1976	37.2719	-23.9046	24.2738	-32.9479	10.5641	120	104	7	14	275.7	31.8333
1712	30	11	107	20	14.4	1815	37.2719	-23.9046	24.2738	-32.9479	10.5641	120	104	7	14	283.8	31.8333
1713	30	11	122	26	20.6	1708	37.2719	-23.9046	24.2738	-32.9479	10.5641	120	104	7	14	256.8	35.6667
1714	30	11	127	28	22.4	2150	37.2719	-23.9046	24.2738	-32.9479	10.5641	120	104	7	14	286.2	27.75
1715	30	11	122	24	17.5	1858	37.2719	-23.9046	24.2738	-32.9479	10.5641	120	104	7	14	275.5	35.6667
1716	30	11	147	28	20.4	1994	37.2719	-23.9046	24.2738	-32.9479	10.5641	120	104	7	14	293	35.6667
1717	30	11	142	22	18.4	2390	37.2719	-23.9046	24.2738	-32.9479	10.5641	120	104	7	14	323.6	27.75
1718	30	11	47	10	8.6	1974	37.2719	-23.9046	24.2738	-32.9479	10.5641	120	104	7	14	283	27.75
1719	30	11	117	26	20.6	1656	37.2719	-23.9046	24.2738	-32.9479	10.5641	120	104	7	14	245.3	35.6667
1720	30	11	57	14	8.5	2287	37.2719	-23.9046	24.2738	-32.9479	10.5641	120	104	7	14	309.9	27.75
1721	30	11	127	32	18.4	1632	36.195	-23.5393	23.0574	-32.7693	10.7191	106	106	8	13	261.3	47.8333
1722	30	11	122	22	14.4	1812	37.2719	-23.9046	24.2738	-32.9479	10.5641	120	104	7	14	270.1	31.8333
1723	30	11	97	20	16.6	1796	36.195	-23.5393	23.0574	-32.7693	10.7191	106	106	8	13	272	40.75
1724	30	11	112	24	20.6	2260	37.2719	-23.9046	24.2738	-32.9479	10.5641	120	104	7	14	302.9	27.75
1725	30	11	82	18	15.8	1933	36.195	-23.5393	23.0574	-32.7693	10.7191	106	106	8	13	271.9	40.75
1726	30	11	87	20	14.6	1764	36.195	-23.5393	23.0574	-32.7693	10.7191	106	106	8	13	270	49.1667
1727	30	11	142	30	23.5	2339	37.2719	-23.9046	24.2738	-32.9479	10.5641	120	104	7	14	316.3	29.1667
1728	30	11	142	30	22.4	2036	37.2719	-23.9046	24.2738	-32.9479	10.5641	120	104	7	14	298.4	27.75
1729	30	11	142	20	14.3	2150	37.2719	-23.9046	24.2738	-32.9479	10.5641	120	104	7	14	299.6	34.25
1730	30	11	112	24	18.5	1884	36.195	-23.5393	23.0574	-32.7693	10.7191	106	106	8	13	274.6	40.75
1731	30	11	37	10	9.6	1997	37.2719	-23.9046	24.2738	-32.9479	10.5641	120	104	7	14	298.4	27.75
1732	310	13	27	22	15	1362	36.195	-23.5393	23.0574	-32.7693	10.7191	106	106	8	13	242.9	49.1667
1733	30	11	117	24	18.5	2176	37.2719	-23.9046	24.2738	-32.9479	10.5641	120	104	7	14	295.2	31.8333
1734	30	11	57	14	9.5	2105	37.2719	-23.9046	24.2738	-32.9479	10.5641	120	104	7	14	305	27.75
1735	30	11	157	30	17.2	2353	37.2719	-23.9046	24.2738	-32.9479	10.5641	120	104	7	14	320.3	27.75
1736	30	11	132	24	14.3	1848	37.2719	-23.9046	24.2738	-32.9479	10.5641	120	104	7	14	272.6	40.6667
1737	30	11	87	14	10.4	2009	37.2719	-23.9046	24.2738	-32.9479	10.5641	120	104	7	14	293.1	27.75
1738	30	11	87	20	17.7	1984	36.195	-23.5393	23.0574	-32.7693	10.7191	106	106	8	13	282.2	40.75
1739	30	11	117	24	17.5	1824	36.195	-23.5393	23.0574	-32.7693	10.7191	106	106	8	13	276.4	40.6667
1740	30	11	122	22	16.5	2121	37.2719	-23.9046	24.2738	-32.9479	10.5641	120	104	7	14	301.7	31.8333
1741	30	11	107	24	18.5	1867	36.195	-23.5393	23.0574	-32.7693	10.7191	106	106	8	13	281.6	40.75
1742	30	11	137	28	22.4	2445	37.2719	-23.9046	24.2738	-32.9479	10.5641	120	104	7	14	323.6	29.1667
1743	30	11	137	28	22.4	2125	37.2719	-23.9046	24.2738	-32.9479	10.5641	120	104	7	14	298.4	27.75
1744	30	11	112	24	15.5	1872	36.195	-23.5393	23.0574	-32.7693	10.7191	106	106	8	13	276.2	40.75
1745	30	11	97	26	15.6	1670	37.2719	-23.9046	24.2738	-32.9479	10.5641	120	104	7	14	271.9	40.6667
1746	30	11	187	28	16.2	2387	37.2719	-23.9046	24.2738	-32.9479	10.5641	120	104	7	14	330.9	27.75
1747	30	11	97	14	11.4	2085	37.2719	-23.9046	24.2738	-32.9479	10.5641	120	104	7	14	293.1	35.6667
1748	30	11	57	10	7.4	1735	37.2719	-23.9046	24.2738	-32.9479	10.5641	120	104	7	14	283.8	31.8333
1749	30	11	117	26	19.6	2123	36.195	-23.5393	23.0574	-32.7693	10.7191	106	106	8	13	287	40.75
1750	30	11	112	22	17.5	2288	37.2719	-23.9046	24.2738	-32.9479	10.5641	120	104	7	14	295.2	31.8333
1751	30	11	37	12	10.2	1899	37.2719	-23.9046	24.2738	-32.9479	10.5641	120	104	7	14	293	35.6667
1752	30	11	87	18	14.6	1689	36.195	-23.5393	23.0574	-32.7693	10.7191	106	106	8	13	266.6	47.8333
1753	30	11	132	22	17	2212	37.2719	-23.9046	24.2738	-32.9479	10.5641	120	104	7	14	320.3	27.75
1754	30	11	117	22	16.5	1758	36.195	-23.5393	23.0574	-32.7693	10.7191	106	106	8	13	267.1	51.3333
1755	30	11	137	20	13.3	1965	37.2719	-23.9046	24.2738	-32.9479	10.5641	120	104	7	14	284.4	34.25
1756	30	11	117	26	17.5	1722	36.195	-23.5393	23.0574	-32.7693	10.7191	106	106	8	13	266.6	47.8333
1757	30	11	112	24	17.5	1897	36.195	-23.5393	23.0574	-32.7693	10.7191	106	106	8	13	276.2	40.6667
1758	30	11	117	26	20.6	2343	37.2719	-23.9046	24.2738	-32.9479	10.5641	120	104	7	14	312.9	27.75
1759	30	11	112	22	14	1888	37.2719	-23.9046	24.2738	-32.9479	10.5641	120	104	7	14	275.5	35.6667
1760	30	11	112	22	17.5	1837	37.2719	-23.9046	24.2738	-32.9479	10.5641	120	104	7	14	261.3	35.6667
1761	30	11	112	24	19.6	1747	37.2719	-23.9046	24.2738	-32.9479	10.5641	120	104	7	14	261.3	35.6667
1762	30	11	137	22	15.3	2023	37.2719	-23.9046	24.2738	-32.9479	10.5641	120	104	7	14	288	34.25
1763	30	11	57	14	10.6	1896	36.195	-23.5393	23.0574	-32.7693	10.7191	106	106	8	13	281.6	40.75
1764	30	11	87	20	17.7	2116	36.195	-23.5393	23.0574	-32.7693	10.7191	106	106	8	13	282.2	40.75
1765	30	11	137	24	16.3	2311	37.2719	-23.9046	24.2738	-32.9479	10.5641	120	104	7	14	305	27.75
1766	30	11	97	14	11.4	2222	37.2719	-23.9046	24.2738	-32.9479	10.5641	120	104	7	14	298.4	27.75
1767	30	11	67	12	7.4	2210	37.2719	-23.9046	24.2738	-32.9479	10.5641	120	104	7	14	301.7	31.8333
1768	30	11	97	20	17.7	1929	36.195	-23.5393	23.0574	-32.7693	10.7191	106	106	8	13	281.6	40.75
1769	30	11	97	20	15.6	2005	36.195	-23.5393	23.0574	-32.7693	10.7191	106	106	8	13	281.6	40.75
1770	30	11	67	20	12.6	2157	37.2719	-23.9046	24.2738	-32.9479	10.5641	120	104	7	14	291.2	31.8333
1771	30	11	137	24	15.3	2217	37.2719	-23.9046	24.2738	-32.9479	10.5641	120	104	7	14	293.1	27.75
1772	30	11	137	24	15.3	2188	37.2719	-23.9046	24.2738	-32.9479	10.5641	120	104	7	14	293	35.6667
1773	30	11	57	14	10.6	1966	36.195	-23.5393	23.0574	-32.7693	10.7191	106	106	8	13	281.6	40.75
1774	30	11	147	28	22.4	2301	37.2719	-23.9046	24.2738	-32.9479	10.5641	120	104	7	14	302.9	27.75
1775	30	11	122	22	15.5	1890	37.2719	-23.9046	24.2738	-32.9479	10.5641	120	104	7	14	270.1	34.25
1776	30	11	117	26	19.6	1982	36.195	-23.5393	23.0574	-32.7693	10.7191	106	106	8	13	282.2	40.75
1777	30	11	112	22	16	1812	37.2719	-23.9046	24.2738	-32.9479	10.5641	120	104	7	14	283.8	31.8333
1778	30	11	87	22	10.4	1866	36.195	-23.5393	23.0574	-32.7693	10.7191	106	106	8	13	269.1	47.8333
1779	30	11	77	18	15.8	2050	36.195	-23.5393	23.0574	-32.7693	10.7191	106	106	8	13	287	40.75
1780	30	11	119	32	19.6	2170	37.2719	-23.9046	24.2738	-32.9479	10.5641	120	104	7	14	302.6	27.75
1781	30	11	112	22	16.5	1961	36.195	-23.5393	23.0574	-32.7693	10.7191	106	106	8	13	275.1	51.3333
1782	30	11	137	24	15.3	2335	37.2719	-23.9046	24.2738	-32.9479	10.5641	120	104	7	14	320.8	35.6667
1783	30	11	122	20	15.5	2074	37.2719	-23.9046	24.2738	-32.9479	10.5641	120	104	7	14	301.7	31.8333
1784	30	11	97	22	15.6	1703	37.2719	-23.9046	24.2738	-32.9479	10.5641	120	104	7	14	251	35.6667
1785	30	11	187	34	14.1	2351	37.2719	-23.9046	24.2738	-32.9479	10.5641	120	104	7	14	339.9	27.75
1786	30	11	27	6	5.4	2004	37.2719	-23.9046	24.2738	-32.9479	10.5641	120	104	7	14	291.2	31.8333
1787	30	11	92	18	16.6	1838	36.195	-23.5393	23.0574	-32.7693	10.7191	106	106	8	13	266.6	47.8333
1788	30	11	132	28	20.4	2430	37.2719	-23.9046	24.2738	-32.9479	10.5641	120	104	7	14	312.9	27.75
1789	30	11	97	20	10.4	2074	37.2719	-23.9046	24.2738	-32.9479	10.5641	120	104	7	14	275.5	35.6667
1790	30	11	112	22	16	2066	37.2719	-23.9046	24.2738	-32.9479	10.5641	120	104	7	14	301.7	31.8333
1791	30	11	112	8	6.2	2327	37.2719	-23.9046	24.2738	-32.9479	10.5641	120	104	7	14	316.3	34.25
1792	30	11	137	28	20.4	2470	37.2719	-23.9046	24.2738	-32.9479	10.5641	120	104	7	14	323.6	27.75
1793	30	11	112	22	20.6	1806	37.2719	-23.9046	24.2738	-32.9479	10.5641	120	104	7	14	271.9	40.6667
1794	30	11	122	22	15.5	2048	37.2719	-23.9046	24.2738	-32.9479	10.5641	120	104	7	14	319.3	31.8333
1795	30	11	117	22	17.5	2180	36.195	-23.5393	23.0574	-32.7693	10.7191	106	106	8	13	291.5	40.75
1796	30	11	97	20	16.6	2075	36.195	-23.5393	23.0574	-32.7693	10.7191	106	106	8	13	281.6	40.75
1797	30	11	137	22	14.3	2039	37.2719	-23.9046	24.2738	-32.9479	10.5641	120	104	7	14	299	34.25
1798	30	11	127	22	16.3	2046	36.195	-23.5393	23.0574	-32.7693	10.7191	106	106	8	13	289.1	51.3333
1799	30	11	102	24	20.8	2406	37.2719	-23.9046	24.2738	-32.9479	10.5641	120	104	7	14	302.9	27.75
1800	30	11	132	20	15.3	2415	37.2719	-23.9046	24.2738	-32.9479	10.5641	120	104	7	14	320.8	27.75
1801	30	11	112	22	16	1824	37.2719	-23.9046	24.2738	-32.9479	10.5641	120	104	7	14	279.7	31.8333
1802	30	11	42	14	9.6	1593	36.195	-23.5393	23.0574	-32.7693	10.7191	106	106	8	13	258.5	51.3333
1803	30	11	127	26	19.4	2176	36.195	-23.5393	23.0574	-32.7693	10.7191	106	106	8	13	295.2	40.75
1804	30	11	117	22	16.5	2046	36.195	-23.5393	23.0574	-32.7693	10.7191	106	106	8	13	279.1	51.3333
1805	30	11	147	22	16.3	2483	37.2719	-23.9046	24.2738	-32.9479	10.5641	120	104	7	14	339.9	27.75
1806	310	13	72	24	17	1427	36.195	-23.5393	23.0574	-32.7693	10.7191	106	106	8	13	238.1	49.1667
1807	30	11	117	22	17.5	1979	36.195	-23.5393	23.0574	-32.7693	10.7191	106	106	8	13	278.1	51.3333
1808	30	11	127	26	16.3	2254	37.2719	-23.9046	24.2738	-32.9479	10.5641	120	104	7	14	336.5	27.75
1809	30	11	57	12	6.4	1758	37.2719	-23.9046	24.2738	-32.9479	10.5641	120	104	7	14	294.6	31.8333
1810	30	11	127	28	20.4	2144	36.195	-23.5393	23.0574	-32.7693	10.7191	106	106	8	13	285.2	40.6667
1811	30	11	87	20	14.6	1731	36.195	-23.5393	23.0574	-32.7693	10.7191	106	106	8	13	267.1	49.1667
1812	30	11	112	22	17	1842	36.195	-23.5393	23.0574	-32.7693	10.7191	106	106	8	13	266.6	47.8333
1813	30	11	107	18	10.3	2316	37.2719	-23.9046	24.2738	-32.9479	10.5641	120	104	7	14	314.8	34.25
1814	30	11	137	20	13.3	2105	37.2719	-23.9046	24.2738	-32.9479	10.5641	120	104	7	14	311.2	34.25
1815	30	11	77	20	14.7	1822	36.195	-23.5393	23.0574	-32.7693	10.7191	106	106	8	13	272.1	47.8333
1816	30	11	92	26	20.8	1857	36.195	-23.5393	23.0574	-32.7693	10.7191	106	106	8	13	273.1	51.3333
1817	30	11	87	12	9.4	2075	37.2719	-23.9046	24.2738	-32.9479	10.5641	120	104	7	14	311.2	34.25
1818	30	11	27	14	7.6	1956	36.195	-23.5393	23.0574	-32.7693	10.7191	106	106	8	13	276.4	40.6667
1819	30	11	117	26	16.5	1915	36.195	-23.5393	23.0574	-32.7693	10.7191	106	106	8	13	275.1	51.3333
1820	30	11	107	18	8.2	2453	37.2719	-23.9046	24.2738	-32.9479	10.5641	120	104	7	14	343.5	29.1667
1821	30	11	37	12	8.6	1930	36.195	-23.5393	23.0574	-32.7693	10.7191	106	106	8	13	285.2	40.6667
1822	30	11	112	26	21.6	1768	36.195	-23.5393	23.0574	-32.7693	10.7191	106	106	8	13	266.6	47.8333
1823	30	11	107	26	17	2223	37.2719	-23.9046	24.2738	-32.9479	10.5641	120	104	7	14	298.4	27.75
1824	30	11	127	28	17.3	1972	36.195	-23.5393	23.0574	-32.7693	10.7191	106	106	8	13	294.2	40.75
1825	30	11	112	22	16	2165	37.2719	-23.9046	24.2738	-32.9479	10.5641	120	104	7	14	319.3	31.8333
1826	310	13	67	34	14.7	1375	36.195	-23.5393	23.0574	-32.7693	10.7191	106	106	8	13	249.5	49.1667
1827	30	11	127	26	17.3	1908	36.195	-23.5393	23.0574	-32.7693	10.7191	106	106	8	13	273.1	51.3333
1828	30	11	132	16	9.2	2452	37.2719	-23.9046	24.2738	-32.9479	10.5641	120	104	7	14	331.9	34.25
1829	30	11	112	20	13.4	2220	37.2719	-23.9046	24.2738	-32.9479	10.5641	120	104	7	14	299	34.25
1830	30	11	127	24	16.3	2152	37.2719	-23.9046	24.2738	-32.9479	10.5641	120	104	7	14	318.7	27.75
1831	30	11	137	26	19.4	2077	36.195	-23.5393	23.0574	-32.7693	10.7191	106	106	8	13	291.5	40.75
1832	30	11	112	18	13.4	2319	37.2719	-23.9046	24.2738	-32.9479	10.5641	120	104	7	14	310.7	35.6667
1833	30	11	137	28	21.4	2467	37.2719	-23.9046	24.2738	-32.9479	10.5641	120	104	7	14	326.8	27.75
1834	30	11	107	32	11.3	1837	36.195	-23.5393	23.0574	-32.7693	10.7191	106	106	8	13	265.3	47.8333
1835	30	11	97	26	21.8	1808	36.195	-23.5393	23.0574	-32.7693	10.7191	106	106	8	13	261.3	51.3333
1836	30	11	127	26	17.3	2408	37.2719	-23.9046	24.2738	-32.9479	10.5641	120	104	7	14	318.7	27.75
1837	30	11	122	22	15.5	1950	37.2719	-23.9046	24.2738	-32.9479	10.5641	120	104	7	14	294.6	31.8333
1838	30	11	32	8	7	2180	37.2719	-23.9046	24.2738	-32.9479	10.5641	120	104	7	14	318.7	27.75
1839	30	11	122	22	16.5	1876	37.2719	-23.9046	24.2738	-32.9479	10.5641	120	104	7	14	279.7	31.8333
1840	30	11	137	26	21.4	2347	37.2719	-23.9046	24.2738	-32.9479	10.5641	120	104	7	14	326.8	27.75
1841	30	11	132	26	20.4	2121	36.195	-23.5393	23.0574	-32.7693	10.7191	106	106	8	13	295.2	40.75
1842	30	11	147	32	20.4	2120	36.195	-23.5393	23.0574	-32.7693	10.7191	106	106	8	13	291.5	40.75
1843	30	11	147	28	22.4	2357	37.2719	-23.9046	24.2738	-32.9479	10.5641	120	104	7	14	326.8	27.75
1844	30	11	102	22	17.7	2210	37.2719	-23.9046	24.2738	-32.9479	10.5641	120	104	7	14	310.1	31.8333
1845	30	11	137	28	20.4	2647	37.2719	-23.9046	24.2738	-32.9479	10.5641	120	104	7	14	337.9	27.75
1846	30	11	82	8	7.4	2155	37.2719	-23.9046	24.2738	-32.9479	10.5641	120	104	7	14	311.2	34.25
1847	30	11	107	16	7.2	2328	37.2719	-23.9046	24.2738	-32.9479	10.5641	120	104	7	14	314.8	34.25
1848	30	11	132	30	21.4	1975	37.2719	-23.9046	24.2738	-32.9479	10.5641	120	104	7	14	287	35.6667
1849	30	11	137	16	11.2	2233	37.2719	-23.9046	24.2738	-32.9479	10.5641	120	104	7	14	311.2	34.25
1850	30	11	92	20	12.5	1657	36.195	-23.5393	23.0574	-32.7693	10.7191	106	106	8	13	259.1	49.1667
1851	30	11	112	28	20.6	2487	37.2719	-23.9046	24.2738	-32.9479	10.5641	120	104	7	14	328.1	27.75
1852	30	11	92	18	13.5	1809	37.2719	-23.9046	24.2738	-32.9479	10.5641	120	104	7	14	294.6	31.8333
1853	30	11	147	20	17.3	2209	37.2719	-23.9046	24.2738	-32.9479	10.5641	120	104	7	14	331.7	34.25
1854	30	11	137	22	18.4	2346	36.195	-23.5393	23.0574	-32.7693	10.7191	106	106	8	13	294.2	40.75
1855	30	11	117	22	17.5	1747	36.195	-23.5393	23.0574	-32.7693	10.7191	106	106	8	13	266.3	49.1667
1856	30	11	107	26	9.3	1971	36.195	-23.5393	23.0574	-32.7693	10.7191	106	106	8	13	276.6	47.8333
1857	30	11	57	14	9.5	1654	37.2719	-23.9046	24.2738	-32.9479	10.5641	120	104	7	14	276.1	40.6667
1858	30	11	97	24	15.6	2422	37.2719	-23.9046	24.2738	-32.9479	10.5641	120	104	7	14	310.1	31.8333
1859	30	11	117	26	19.6	2560	37.2719	-23.9046	24.2738	-32.9479	10.5641	120	104	7	14	328.1	27.75
1860	30	11	112	20	15	2648	37.2719	-23.9046	24.2738	-32.9479	10.5641	120	104	7	14	339.9	27.75
1861	30	11	107	24	19.6	1607	37.2719	-23.9046	24.2738	-32.9479	10.5641	120	104	7	14	264.6	35.6667
1862	30	11	137	28	21.4	2428	37.2719	-23.9046	24.2738	-32.9479	10.5641	120	104	7	14	328.1	27.75
1863	30	11	122	22	15.5	2099	37.2719	-23.9046	24.2738	-32.9479	10.5641	120	104	7	14	279.7	34.25
1864	30	11	147	28	19.4	2515	37.2719	-23.9046	24.2738	-32.9479	10.5641	120	104	7	14	328.1	27.75
1865	30	11	107	32	11.3	1960	36.195	-23.5393	23.0574	-32.7693	10.7191	106	106	8	13	276.6	47.8333
1866	30	11	132	28	21.4	1878	37.2719	-23.9046	24.2738	-32.9479	10.5641	120	104	7	14	276.1	40.6667
1867	30	11	112	18	13	2193	37.2719	-23.9046	24.2738	-32.9479	10.5641	120	104	7	14	319.3	31.8333
1868	30	11	137	22	15.3	2219	36.195	-23.5393	23.0574	-32.7693	10.7191	106	106	8	13	294.2	40.75
1869	30	11	112	24	21.6	1816	37.2719	-23.9046	24.2738	-32.9479	10.5641	120	104	7	14	289.8	40.6667
1870	30	11	97	24	20.8	1962	37.2719	-23.9046	24.2738	-32.9479	10.5641	120	104	7	14	262	35.6667
1871	30	11	102	20	16.6	2224	37.2719	-23.9046	24.2738	-32.9479	10.5641	120	104	7	14	287	35.6667
1872	30	11	117	24	16.5	1774	36.195	-23.5393	23.0574	-32.7693	10.7191	106	106	8	13		-9999
1873	30	11	117	24	15.5	2261	37.2719	-23.9046	24.2738	-32.9479	10.5641	120	104	7	14	290.5	40.6667
1874	30	11	57	14	8.5	1997	37.2719	-23.9046	24.2738	-32.9479	10.5641	120	104	7	14	294.6	31.8333
1875	30	11	147	24	20.4	1942	36.195	-23.5393	23.0574	-32.7693	10.7191	106	106	8	13	273.5	47.8333
1876	30	11	122	20	13.4	2238	37.2719	-23.9046	24.2738	-32.9479	10.5641	120	104	7	14	319.3	31.8333
1877	30	11	112	20	18.5	1916	36.195	-23.5393	23.0574	-32.7693	10.7191	106	106	8	13	271.6	47.8333
1878	30	11	122	24	16.5	2154	36.195	-23.5393	23.0574	-32.7693	10.7191	106	106	8	13	278.1	51.3333
1879	30	11	122	26	17	1997	36.195	-23.5393	23.0574	-32.7693	10.7191	106	106	8	13	285.2	40.6667
1880	30	11	117	14	13.4	1848	37.2719	-23.9046	24.2738	-32.9479	10.5641	120	104	7	14	276.1	40.6667
1881	30	11	112	24	21.6	1813	36.195	-23.5393	23.0574	-32.7693	10.7191	106	106	8	13	271.6	47.8333
1882	30	11	102	22	16.6	2427	37.2719	-23.9046	24.2738	-32.9479	10.5641	120	104	7	14	310.1	31.8333
1883	30	11	142	28	18.4	2017	36.195	-23.5393	23.0574	-32.7693	10.7191	106	106	8	13	273.5	47.8333
1884	30	11	77	24	17.9	1736	37.2719	-23.9046	24.2738	-32.9479	10.5641	120	104	7	14	262	35.6667
1885	30	11	92	24	19.8	1821	36.195	-23.5393	23.0574	-32.7693	10.7191	106	106	8	13	281.4	49.1667
1886	30	11	32	8	6	1906	37.2719	-23.9046	24.2738	-32.9479	10.5641	120	104	7	14	289.8	40.6667
1887	30	11	127	28	17.3	2408	37.2719	-23.9046	24.2738	-32.9479	10.5641	120	104	7	14	336.5	27.75
1888	30	11	117	20	15.5	2374	37.2719	-23.9046	24.2738	-32.9479	10.5641	120	104	7	14	299	34.25
1889	30	11	117	22	17.5	2173	36.195	-23.5393	23.0574	-32.7693	10.7191	106	106	8	13	293.7	40.75
1890	30	11	122	26	17	2204	37.2719	-23.9046	24.2738	-32.9479	10.5641	120	104	7	14	318.7	27.75
1891	30	11	37	18	17.3	2061	36.195	-23.5393	23.0574	-32.7693	10.7191	106	106	8	13	285.2	40.6667
1892	30	11	97	20	17.7	1863	36.195	-23.5393	23.0574	-32.7693	10.7191	106	106	8	13	272.1	47.8333
1893	30	11	137	28	21.4	1816	36.195	-23.5393	23.0574	-32.7693	10.7191	106	106	8	13	272	49.1667
1894	30	11	112	22	15	2344	37.2719	-23.9046	24.2738	-32.9479	10.5641	120	104	7	14	310.7	35.6667
1895	30	11	147	22	20.4	2229	36.195	-23.5393	23.0574	-32.7693	10.7191	106	106	8	13	291.5	40.75
1896	30	11	117	22	17.5	2174	36.195	-23.5393	23.0574	-32.7693	10.7191	106	106	8	13	293.7	40.75
1897	30	11	137	24	19.4	2249	36.195	-23.5393	23.0574	-32.7693	10.7191	106	106	8	13	291.5	40.75
1898	30	11	117	20	16.5	2153	36.195	-23.5393	23.0574	-32.7693	10.7191	106	106	8	13	293.7	40.75
1899	30	11	132	18	13	2671	37.2719	-23.9046	24.2738	-32.9479	10.5641	120	104	7	14	339.9	27.75
1900	30	11	112	22	16.5	2406	37.2719	-23.9046	24.2738	-32.9479	10.5641	120	104	7	14	338.6	31.8333
1901	30	11	57	12	8.5	1889	37.2719	-23.9046	24.2738	-32.9479	10.5641	120	104	7	14	294.6	31.8333
1902	30	11	97	22	16.6	2478	37.2719	-23.9046	24.2738	-32.9479	10.5641	120	104	7	14	338.3	27.75
1903	30	11	67	12	8.4	2108	37.2719	-23.9046	24.2738	-32.9479	10.5641	120	104	7	14	319.3	31.8333
1904	30	11	127	22	13.3	2373	37.2719	-23.9046	24.2738	-32.9479	10.5641	120	104	7	14	320.8	35.6667
1905	30	11	157	30	19.2	2200	37.2719	-23.9046	24.2738	-32.9479	10.5641	120	104	7	14	299	34.25
1906	30	11	142	28	20.4	1987	36.195	-23.5393	23.0574	-32.7693	10.7191	106	106	8	13	276.6	47.8333
1907	30	11	122	20	13	2260	37.2719	-23.9046	24.2738	-32.9479	10.5641	120	104	7	14	310.7	35.6667
1908	30	11	127	24	17.3	1456	36.195	-23.5393	23.0574	-32.7693	10.7191	106	106	8	13	239.7	49.1667
1909	30	11	117	20	16.5	2190	36.195	-23.5393	23.0574	-32.7693	10.7191	106	106	8	13	289.1	40.75
1910	30	11	147	30	20.4	2104	37.2719	-23.9046	24.2738	-32.9479	10.5641	120	104	7	14	310	40.6667
1911	30	11	137	26	16.3	2192	37.2719	-23.9046	24.2738	-32.9479	10.5641	120	104	7	14	330.8	31.8333
1912	30	11	127	24	15.3	2399	37.2719	-23.9046	24.2738	-32.9479	10.5641	120	104	7	14	338.3	27.75
1913	30	11	147	30	19.4	2232	37.2719	-23.9046	24.2738	-32.9479	10.5641	120	104	7	14	297.9	34.25
1914	30	11	117	24	11.3	2092	37.2719	-23.9046	24.2738	-32.9479	10.5641	120	104	7	14	287	35.6667
1915	30	11	97	28	9.4	2024	36.195	-23.5393	23.0574	-32.7693	10.7191	106	106	8	13	276.6	47.8333
1916	30	11	137	26	17.3	2377	36.195	-23.5393	23.0574	-32.7693	10.7191	106	106	8	13	319.1	40.75
1917	30	11	135	24	17.3	2353	37.2719	-23.9046	24.2738	-32.9479	10.5641	120	104	7	14	320.6	40.6667
1918	30	11	139	32	21.4	2343	36.195	-23.5393	23.0574	-32.7693	10.7191	106	106	8	13	314.8	40.6667
1919	30	11	132	24	15.3	2271	37.2719	-23.9046	24.2738	-32.9479	10.5641	120	104	7	14	307.6	34.25
1920	30	11	137	30	21.4	2391	37.2719	-23.9046	24.2738	-32.9479	10.5641	120	104	7	14	314.8	40.6667
1921	30	11	137	20	13.3	2517	37.2719	-23.9046	24.2738	-32.9479	10.5641	120	104	7	14	342.6	34.25
1922	30	11	117	26	18.5	1664	36.195	-23.5393	23.0574	-32.7693	10.7191	106	106	8	13	266.3	49.1667
1923	30	11	87	18	13.5	2230	37.2719	-23.9046	24.2738	-32.9479	10.5641	120	104	7	14	314	31.8333
1924	30	11	97	24	19.8	1706	36.195	-23.5393	23.0574	-32.7693	10.7191	106	106	8	13	270.9	49.1667
1925	30	11	127	32	17.3	2517	37.2719	-23.9046	24.2738	-32.9479	10.5641	120	104	7	14	329.4	27.75
1926	30	11	112	22	17	2152	36.195	-23.5393	23.0574	-32.7693	10.7191	106	106	8	13	289.1	40.75
1927	30	11	112	20	14.4	2081	37.2719	-23.9046	24.2738	-32.9479	10.5641	120	104	7	14	297.9	34.25
1928	30	11	112	20	12.4	2339	37.2719	-23.9046	24.2738	-32.9479	10.5641	120	104	7	14	330.8	31.8333
1929	30	11	112	22	14	2406	37.2719	-23.9046	24.2738	-32.9479	10.5641	120	104	7	14	341.4	31.8333
1930	30	11	117	20	16.5	2080	36.195	-23.5393	23.0574	-32.7693	10.7191	106	106	8	13	289.1	51.3333
1931	30	11	117	24	16.5	2016	36.195	-23.5393	23.0574	-32.7693	10.7191	106	106	8	13	265.3	47.8333
1932	30	11	137	30	23.5	1774	36.195	-23.5393	23.0574	-32.7693	10.7191	106	106	8	13	276.7	49.1667
1933	30	11	112	22	13	2039	37.2719	-23.9046	24.2738	-32.9479	10.5641	120	104	7	14	314	31.8333
1934	30	11	142	24	17.3	2086	37.2719	-23.9046	24.2738	-32.9479	10.5641	120	104	7	14	297.9	34.25
1935	30	11	42	6	6.4	2322	37.2719	-23.9046	24.2738	-32.9479	10.5641	120	104	7	14	338.3	27.75
1936	30	11	117	24	17.5	1832	37.2719	-23.9046	24.2738	-32.9479	10.5641	120	104	7	14	273.3	35.6667
1937	30	11	117	26	18.5	1958	36.195	-23.5393	23.0574	-32.7693	10.7191	106	106	8	13	265.3	47.8333
1938	30	11	117	22	19.6	1967	36.195	-23.5393	23.0574	-32.7693	10.7191	106	106	8	13	281.2	47.8333
1939	30	11	147	24	21.4	2158	36.195	-23.5393	23.0574	-32.7693	10.7191	106	106	8	13	283.3	40.75
1940	30	11	127	22	18.4	1884	37.2719	-23.9046	24.2738	-32.9479	10.5641	120	104	7	14	283.9	40.6667
1941	30	11	122	22	15.5	2032	36.195	-23.5393	23.0574	-32.7693	10.7191	106	106	8	13	282.4	51.3333
1942	30	11	142	24	15.3	1943	37.2719	-23.9046	24.2738	-32.9479	10.5641	120	104	7	14	293.2	34.25
1943	30	11	112	22	16.5	1771	37.2719	-23.9046	24.2738	-32.9479	10.5641	120	104	7	14	290.6	40.6667
1944	30	11	117	20	12.4	2388	37.2719	-23.9046	24.2738	-32.9479	10.5641	120	104	7	14	330.8	31.8333
1945	30	11	147	18	10.2	2434	37.2719	-23.9046	24.2738	-32.9479	10.5641	120	104	7	14	331.7	34.25
1946	30	11	127	28	19.4	1911	37.2719	-23.9046	24.2738	-32.9479	10.5641	120	104	7	14	292.6	35.6667
1947	30	11	132	26	18.4	2232	37.2719	-23.9046	24.2738	-32.9479	10.5641	120	104	7	14	307.1	22.9167
1948	30	11	137	30	22.4	1951	36.195	-23.5393	23.0574	-32.7693	10.7191	106	106	8	13	282.4	47.8333
1949	30	11	97	22	16.6	2597	37.2719	-23.9046	24.2738	-32.9479	10.5641	120	104	7	14	338.6	31.8333
1950	30	11	147	24	15.3	1970	37.2719	-23.9046	24.2738	-32.9479	10.5641	120	104	7	14	293.2	31.8333
1951	30	11	147	28	16.3	1972	37.2719	-23.9046	24.2738	-32.9479	10.5641	120	104	7	14	293.2	31.8333
1952	30	11	87	20	16.6	2004	36.195	-23.5393	23.0574	-32.7693	10.7191	106	106	8	13	272.3	47.8333
1953	30	11	147	16	11.2	2480	37.2719	-23.9046	24.2738	-32.9479	10.5641	120	104	7	14	342.6	34.25
1954	30	11	112	20	14.4	2078	37.2719	-23.9046	24.2738	-32.9479	10.5641	120	104	7	14	297.9	22.9167
1955	30	11	127	22	15.3	2118	37.2719	-23.9046	24.2738	-32.9479	10.5641	120	104	7	14	314	31.8333
1956	30	11	112	22	16	2432	36.195	-23.5393	23.0574	-32.7693	10.7191	106	106	8	13	310.3	40.75
1957	30	11	147	36	19.4	2457	37.2719	-23.9046	24.2738	-32.9479	10.5641	120	104	7	14	329.4	27.75
1958	30	11	137	30	19.4	2257	37.2719	-23.9046	24.2738	-32.9479	10.5641	120	104	7	14	308.9	35.6667
1959	30	11	112	22	13	2688	37.2719	-23.9046	24.2738	-32.9479	10.5641	120	104	7	14	353.5	27.75
1960	30	11	132	24	18.4	1933	36.195	-23.5393	23.0574	-32.7693	10.7191	106	106	8	13	276.7	51.3333
1961	30	11	27	12	8.6	1481	36.195	-23.5393	23.0574	-32.7693	10.7191	106	106	8	13	254.6	51.3333
1962	30	11	117	20	13.4	2536	37.2719	-23.9046	24.2738	-32.9479	10.5641	120	104	7	14	341.4	31.8333
1963	30	11	112	22	17.5	2047	36.195	-23.5393	23.0574	-32.7693	10.7191	106	106	8	13	277.8	51.3333
1964	30	11	137	26	17.3	2485	36.195	-23.5393	23.0574	-32.7693	10.7191	106	106	8	13	319.1	40.75
1965	30	11	132	22	17.3	1926	36.195	-23.5393	23.0574	-32.7693	10.7191	106	106	8	13	276.7	51.3333
1966	30	11	92	18	12.5	2054	37.2719	-23.9046	24.2738	-32.9479	10.5641	120	104	7	14	293.2	31.8333
1967	30	11	117	22	13.4	2460	37.2719	-23.9046	24.2738	-32.9479	10.5641	120	104	7	14	341.4	31.8333
1968	30	11	97	20	15.6	2651	37.2719	-23.9046	24.2738	-32.9479	10.5641	120	104	7	14	338.3	27.75
1969	30	11	137	26	15.3	2065	37.2719	-23.9046	24.2738	-32.9479	10.5641	120	104	7	14	314	31.8333
1970	30	11	132	14	8.2	2549	37.2719	-23.9046	24.2738	-32.9479	10.5641	120	104	7	14	352.2	29.1667
1971	30	11	102	24	19.8	2185	37.2719	-23.9046	24.2738	-32.9479	10.5641	120	104	7	14	310	40.6667
1972	30	11	117	24	20.6	1808	37.2719	-23.9046	24.2738	-32.9479	10.5641	120	104	7	14	273.3	35.6667
1973	30	11	82	20	16.8	1959	36.195	-23.5393	23.0574	-32.7693	10.7191	106	106	8	13	272.3	32.25
1974	30	11	117	22	18.5	1916	36.195	-23.5393	23.0574	-32.7693	10.7191	106	106	8	13	276.7	47.8333
1975	30	11	157	28	21.2	2063	36.195	-23.5393	23.0574	-32.7693	10.7191	106	106	8	13	281.1	47.8333
1976	30	11	157	28	22.2	2098	36.195	-23.5393	23.0574	-32.7693	10.7191	106	106	8	13	281.2	32.25
1977	30	11	117	24	20.6	2132	36.195	-23.5393	23.0574	-32.7693	10.7191	106	106	8	13	294.1	31.75
1978	30	11	127	24	17.3	1996	36.195	-23.5393	23.0574	-32.7693	10.7191	106	106	8	13	277.8	51.3333
1979	30	11	122	22	14.4	2210	37.2719	-23.9046	24.2738	-32.9479	10.5641	120	104	7	14	297.9	22.9167
1980	30	11	122	20	15.5	2232	37.2719	-23.9046	24.2738	-32.9479	10.5641	120	104	7	14	324.6	30.5833
1981	30	11	137	26	16.3	2325	37.2719	-23.9046	24.2738	-32.9479	10.5641	120	104	7	14	307.6	34.25
1982	30	11	47	12	7.5	2168	37.2719	-23.9046	24.2738	-32.9479	10.5641	120	104	7	14	307.6	22.9167
1983	30	11	117	22	17.5	2304	37.2719	-23.9046	24.2738	-32.9479	10.5641	120	104	7	14	324.6	30.5833
1984	30	11	137	26	16.3	2225	37.2719	-23.9046	24.2738	-32.9479	10.5641	120	104	7	14	307.6	22.9167
1985	30	11	127	28	23.5	2097	36.195	-23.5393	23.0574	-32.7693	10.7191	106	106	8	13	283.3	32.25
1986	30	11	147	24	19.4	2140	37.2719	-23.9046	24.2738	-32.9479	10.5641	120	104	7	14	292.6	36
1987	30	11	142	22	16.3	2522	37.2719	-23.9046	24.2738	-32.9479	10.5641	120	104	7	14	332.7	22.9167
1988	30	11	157	32	19.2	2520	37.2719	-23.9046	24.2738	-32.9479	10.5641	120	104	7	14	329.4	28.1667
1989	30	11	102	20	15.6	2405	36.195	-23.5393	23.0574	-32.7693	10.7191	106	106	8	13	293.2	40.75
1990	30	11	137	28	18.4	1658	36.195	-23.5393	23.0574	-32.7693	10.7191	106	106	8	13	254.6	31.75
1991	30	11	112	22	15	2250	37.2719	-23.9046	24.2738	-32.9479	10.5641	120	104	7	14	328.2	22.6667
1992	30	11	132	24	16	2373	37.2719	-23.9046	24.2738	-32.9479	10.5641	120	104	7	14	339	30.5833
1993	30	11	92	34	27	1877	36.195	-23.5393	23.0574	-32.7693	10.7191	106	106	8	13	282.4	47.8333
1994	30	11	142	32	20.4	2431	37.2719	-23.9046	24.2738	-32.9479	10.5641	120	104	7	14	342.6	30.5833
1995	30	11	112	22	17.5	1666	37.2719	-23.9046	24.2738	-32.9479	10.5641	120	104	7	14	296.6	36
1996	30	11	107	20	17.5	1840	36.195	-23.5393	23.0574	-32.7693	10.7191	106	106	8	13	276.7	51.3333
1997	30	11	117	22	17.5	2048	36.195	-23.5393	23.0574	-32.7693	10.7191	106	106	8	13	294.1	31.75
1998	30	11	122	22	18	1814	36.195	-23.5393	23.0574	-32.7693	10.7191	106	106	8	13	282.4	36.9167
1999	30	11	132	20	15	2063	37.2719	-23.9046	24.2738	-32.9479	10.5641	120	104	7	14	309.6	22.6667
2000	30	11	117	22	19.6	2187	36.195	-23.5393	23.0574	-32.7693	10.7191	106	106	8	13	292.4	32.25
2001	30	11	147	20	16.3	2350	37.2719	-23.9046	24.2738	-32.9479	10.5641	120	104	7	14	313	36
2002	30	11	117	24	18.5	1927	36.195	-23.5393	23.0574	-32.7693	10.7191	106	106	8	13	277.8	51.3333
2003	30	11	117	20	15.5	2291	37.2719	-23.9046	24.2738	-32.9479	10.5641	120	104	7	14	317.3	36
2004	30	11	157	32	20.2	2160	37.2719	-23.9046	24.2738	-32.9479	10.5641	120	104	7	14	309.6	22.6667
2005	30	11	137	28	22.4	2385	36.195	-23.5393	23.0574	-32.7693	10.7191	106	106	8	13	315.5	32.25
2006	30	11	102	22	17.7	1895	36.195	-23.5393	23.0574	-32.7693	10.7191	106	106	8	13	277.8	36.9167
2007	30	11	127	22	16.3	2008	37.2719	-23.9046	24.2738	-32.9479	10.5641	120	104	7	14	270.6	36
2008	30	11	132	24	15.3	2377	37.2719	-23.9046	24.2738	-32.9479	10.5641	120	104	7	14	313.4	22.9167
2009	30	11	117	26	21.6	2281	37.2719	-23.9046	24.2738	-32.9479	10.5641	120	104	7	14	324.5	30.5833
2010	30	11	117	26	21.6	2051	36.195	-23.5393	23.0574	-32.7693	10.7191	106	106	8	13	292.4	32.25
2011	30	11	82	18	14.7	2132	36.195	-23.5393	23.0574	-32.7693	10.7191	106	106	8	13	281.1	47.8333
2012	30	11	142	30	18.4	2550	37.2719	-23.9046	24.2738	-32.9479	10.5641	120	104	7	14	339	30.5833
2013	30	11	125	28	17.5	1835	36.195	-23.5393	23.0574	-32.7693	10.7191	106	106	8	13	267.9	36.9167
2014	30	11	137	24	18.4	1945	36.195	-23.5393	23.0574	-32.7693	10.7191	106	106	8	13	292.7	31.75
2015	30	11	147	20	16.3	1863	36.195	-23.5393	23.0574	-32.7693	10.7191	106	106	8	13	285.8	31.75
2016	30	11	157	24	18.2	2301	37.2719	-23.9046	24.2738	-32.9479	10.5641	120	104	7	14	316	22.9167
2017	30	11	117	26	22.7	2164	36.195	-23.5393	23.0574	-32.7693	10.7191	106	106	8	13	294.8	32.25
2018	30	11	102	18	13.5	2292	37.2719	-23.9046	24.2738	-32.9479	10.5641	120	104	7	14	328.2	22.6667
2019	30	11	97	20	15.6	2035	37.2719	-23.9046	24.2738	-32.9479	10.5641	120	104	7	14	309.6	22.6667
2020	30	11	132	24	17.3	2334	37.2719	-23.9046	24.2738	-32.9479	10.5641	120	104	7	14	313.4	22.9167
2021	30	11	137	22	18.4	2063	36.195	-23.5393	23.0574	-32.7693	10.7191	106	106	8	13	285.8	31.75
2022	30	11	147	20	18.4	1816	36.195	-23.5393	23.0574	-32.7693	10.7191	106	106	8	13	285.8	31.75
2023	30	11	127	26	17.3	1994	36.195	-23.5393	23.0574	-32.7693	10.7191	106	106	8	13	284.2	36.9167
2024	30	11	137	34	20.4	1435	36.195	-23.5393	23.0574	-32.7693	10.7191	106	106	8	13	263.1	36.9167
2025	30	11	117	22	14.4	2340	37.2719	-23.9046	24.2738	-32.9479	10.5641	120	104	7	14	328.2	22.6667
2026	30	11	107	24	19.6	2094	36.195	-23.5393	23.0574	-32.7693	10.7191	106	106	8	13	295.5	32.25
2027	30	11	117	24	20.6	2437	36.195	-23.5393	23.0574	-32.7693	10.7191	106	106	8	13	313.9	32.25
2028	30	11	117	24	19.6	2227	36.195	-23.5393	23.0574	-32.7693	10.7191	106	106	8	13	312.5	32.25
2029	30	11	112	20	14.4	2493	37.2719	-23.9046	24.2738	-32.9479	10.5641	120	104	7	14	326.1	28.1667
2030	30	11	108	24	15.5	2080	37.2719	-23.9046	24.2738	-32.9479	10.5641	120	104	7	14	317.3	36
2031	30	11	127	30	15.3	2141	36.195	-23.5393	23.0574	-32.7693	10.7191	106	106	8	13	296.1	32.25
2032	30	11	132	22	17.3	2608	37.2719	-23.9046	24.2738	-32.9479	10.5641	120	104	7	14	342.8	22
2033	30	11	112	22	15.5	2252	37.2719	-23.9046	24.2738	-32.9479	10.5641	120	104	7	14	313	28.1667
2034	30	11	147	24	16.3	2235	37.2719	-23.9046	24.2738	-32.9479	10.5641	120	104	7	14	309.6	22.6667
2035	30	11	142	30	18	2579	36.195	-23.5393	23.0574	-32.7693	10.7191	106	106	8	13	326.4	32.25
2036	30	11	117	26	19.6	2231	36.195	-23.5393	23.0574	-32.7693	10.7191	106	106	8	13	284.5	32.25
2037	30	11	137	24	13.3	2410	37.2719	-23.9046	24.2738	-32.9479	10.5641	120	104	7	14	328.2	22.6667
2038	30	11	132	32	25.5	1664	37.2719	-23.9046	24.2738	-32.9479	10.5641	120	104	7	14	270.6	36
2039	30	11	127	24	16.3	2233	37.2719	-23.9046	24.2738	-32.9479	10.5641	120	104	7	14	293.4	36
2040	30	11	112	20	15.5	2290	37.2719	-23.9046	24.2738	-32.9479	10.5641	120	104	7	14	307.1	22.6667
2041	30	11	122	22	16.5	2479	37.2719	-23.9046	24.2738	-32.9479	10.5641	120	104	7	14	336.7	22.9167
2042	30	11	127	24	17.3	2506	36.195	-23.5393	23.0574	-32.7693	10.7191	106	106	8	13	315.5	32.25
2043	30	11	132	30	25.5	1981	37.2719	-23.9046	24.2738	-32.9479	10.5641	120	104	7	14	296.6	36
2044	30	11	124	26	16.5	2407	36.195	-23.5393	23.0574	-32.7693	10.7191	106	106	8	13	296.1	32.25
2045	30	11	147	24	18.4	2043	36.195	-23.5393	23.0574	-32.7693	10.7191	106	106	8	13	292.7	31.75
2046	30	11	137	28	18.4	2369	37.2719	-23.9046	24.2738	-32.9479	10.5641	120	104	7	14	332.7	22.9167
2047	30	11	132	26	17.3	2090	37.2719	-23.9046	24.2738	-32.9479	10.5641	120	104	7	14	293.4	36
2048	30	11	82	22	17.9	1559	36.195	-23.5393	23.0574	-32.7693	10.7191	106	106	8	13	253.1	36.9167
2049	30	11	117	22	16.5	2081	36.195	-23.5393	23.0574	-32.7693	10.7191	106	106	8	13	284.5	32.25
2050	30	11	112	22	18	2308	37.2719	-23.9046	24.2738	-32.9479	10.5641	120	104	7	14	332.7	22.9167
2051	30	11	127	30	17.3	1686	36.195	-23.5393	23.0574	-32.7693	10.7191	106	106	8	13	264.6	36.9167
2052	30	11	127	20	18.4	2251	37.2719	-23.9046	24.2738	-32.9479	10.5641	120	104	7	14	313.4	22.9167
2053	30	11	117	24	15.5	2241	36.195	-23.5393	23.0574	-32.7693	10.7191	106	106	8	13	284.5	32.25
2054	30	11	117	26	20.6	2264	36.195	-23.5393	23.0574	-32.7693	10.7191	106	106	8	13	295.5	32.25
2055	30	11	112	24	18.5	2052	37.2719	-23.9046	24.2738	-32.9479	10.5641	120	104	7	14	296.6	36
2056	30	11	152	24	14.3	2559	37.2719	-23.9046	24.2738	-32.9479	10.5641	120	104	7	14	343.9	22.6667
2057	30	11	117	24	19.6	2274	36.195	-23.5393	23.0574	-32.7693	10.7191	106	106	8	13	304.9	32.25
2058	30	11	117	22	15.5	1817	36.195	-23.5393	23.0574	-32.7693	10.7191	106	106	8	13	272.8	31.75
2059	30	11	132	24	18.4	2483	37.2719	-23.9046	24.2738	-32.9479	10.5641	120	104	7	14	339.5	22.9167
2060	30	11	117	22	16.5	2151	36.195	-23.5393	23.0574	-32.7693	10.7191	106	106	8	13	282	32.25
2061	30	11	142	22	14.3	2264	37.2719	-23.9046	24.2738	-32.9479	10.5641	120	104	7	14	331.1	22.6667
2062	30	11	122	22	17.5	2532	37.2719	-23.9046	24.2738	-32.9479	10.5641	120	104	7	14	318.2	22.9167
2063	30	11	127	26	17.3	1991	36.195	-23.5393	23.0574	-32.7693	10.7191	106	106	8	13	267.9	36.9167
2064	30	11	112	24	20.6	2297	36.195	-23.5393	23.0574	-32.7693	10.7191	106	106	8	13	312.5	32.25
2065	30	11	117	16	12.4	2690	37.2719	-23.9046	24.2738	-32.9479	10.5641	120	104	7	14	343.4	30.5833
2066	30	11	102	20	14.6	2292	37.2719	-23.9046	24.2738	-32.9479	10.5641	120	104	7	14	323.2	22.9167
2067	30	11	127	28	16.3	2497	36.195	-23.5393	23.0574	-32.7693	10.7191	106	106	8	13	319.3	32.25
2068	30	11	127	24	15.3	2643	36.195	-23.5393	23.0574	-32.7693	10.7191	106	106	8	13	315.5	32.25
2069	30	11	112	24	18.5	2436	37.2719	-23.9046	24.2738	-32.9479	10.5641	120	104	7	14	315.5	28.1667
2070	30	11	112	22	15	2524	37.2719	-23.9046	24.2738	-32.9479	10.5641	120	104	7	14	327.5	28.1667
2071	30	11	127	28	15.3	2364	36.195	-23.5393	23.0574	-32.7693	10.7191	106	106	8	13	284.2	32.25
2072	30	11	137	22	15.3	2604	37.2719	-23.9046	24.2738	-32.9479	10.5641	120	104	7	14	337.2	28.1667
2073	30	11	142	30	22.4	2302	37.2719	-23.9046	24.2738	-32.9479	10.5641	120	104	7	14	324.9	22.9167
2074	30	11	137	20	15.3	2200	36.195	-23.5393	23.0574	-32.7693	10.7191	106	106	8	13	296.3	31.75
2075	30	11	115	22	19.6	1694	37.2719	-23.9046	24.2738	-32.9479	10.5641	120	104	7	14	281.9	36
2076	30	11	102	20	17.7	1774	37.2719	-23.9046	24.2738	-32.9479	10.5641	120	104	7	14	281.9	36
2077	30	11	137	34	18.4	1759	37.2719	-23.9046	24.2738	-32.9479	10.5641	120	104	7	14	297.3	36
2078	30	11	112	22	17.5	2355	36.195	-23.5393	23.0574	-32.7693	10.7191	106	106	8	13	304.9	32.25
2079	30	11	102	26	21.8	2166	37.2719	-23.9046	24.2738	-32.9479	10.5641	120	104	7	14	288.7	28.1667
2080	30	11	125	30	14.4	2263	36.195	-23.5393	23.0574	-32.7693	10.7191	106	106	8	13	291.1	36.9167
2081	30	11	132	22	17.3	2311	37.2719	-23.9046	24.2738	-32.9479	10.5641	120	104	7	14	324.9	22.9167
2082	30	11	124	22	17.5	2286	37.2719	-23.9046	24.2738	-32.9479	10.5641	120	104	7	14	323.2	22.9167
2083	30	11	112	24	17.5	1903	36.195	-23.5393	23.0574	-32.7693	10.7191	106	106	8	13	284.7	31.75
2084	30	11	115	30	15	2449	36.195	-23.5393	23.0574	-32.7693	10.7191	106	106	8	13	291.1	32.25
2085	30	11	112	22	16.5	2177	37.2719	-23.9046	24.2738	-32.9479	10.5641	120	104	7	14	315.7	36
2086	30	11	137	24	16.3	2169	36.195	-23.5393	23.0574	-32.7693	10.7191	106	106	8	13	303.5	31.75
2087	30	11	132	28	21.4	2456	37.2719	-23.9046	24.2738	-32.9479	10.5641	120	104	7	14	315.5	28.1667
2088	30	11	142	22	14.3	2251	37.2719	-23.9046	24.2738	-32.9479	10.5641	120	104	7	14	331.1	22.6667
2089	30	11	112	20	14.4	2365	37.2719	-23.9046	24.2738	-32.9479	10.5641	120	104	7	14	318.2	22.6667
2090	30	11	125	30	14.4	1883	36.195	-23.5393	23.0574	-32.7693	10.7191	106	106	8	13	270.8	36.9167
2091	30	11	27	6	5	2388	37.2719	-23.9046	24.2738	-32.9479	10.5641	120	104	7	14	339.5	22.9167
2092	30	11	117	24	19.6	2221	36.195	-23.5393	23.0574	-32.7693	10.7191	106	106	8	13	303.5	31.75
2093	30	11	132	14	10.2	2478	37.2719	-23.9046	24.2738	-32.9479	10.5641	120	104	7	14	327.5	28.1667
2094	30	11	137	16	10.2	2450	37.2719	-23.9046	24.2738	-32.9479	10.5641	120	104	7	14	330.1	28.1667
2095	30	11	137	24	17	2278	37.2719	-23.9046	24.2738	-32.9479	10.5641	120	104	7	14	323.2	22.9167
2096	30	11	87	20	15.6	1987	37.2719	-23.9046	24.2738	-32.9479	10.5641	120	104	7	14	288.7	36
2097	30	11	122	18	14	1959	37.2719	-23.9046	24.2738	-32.9479	10.5641	120	104	7	14	281.9	36
2098	30	11	137	36	21.4	1570	36.195	-23.5393	23.0574	-32.7693	10.7191	106	106	8	13	256.3	36.9167
2099	30	11	142	24	17.3	2351	37.2719	-23.9046	24.2738	-32.9479	10.5641	120	104	7	14	324.9	22.9167
2100	30	11	102	24	17.7	1776	37.2719	-23.9046	24.2738	-32.9479	10.5641	120	104	7	14	274.9	36
2101	30	11	132	22	17.3	2487	37.2719	-23.9046	24.2738	-32.9479	10.5641	120	104	7	14	339.5	22.9167
2102	30	11	117	22	16.5	2220	36.195	-23.5393	23.0574	-32.7693	10.7191	106	106	8	13	296.1	32.25
2103	30	11	117	20	17.5	2570	37.2719	-23.9046	24.2738	-32.9479	10.5641	120	104	7	14	339.5	22
2104	30	11	117	22	15.5	2612	37.2719	-23.9046	24.2738	-32.9479	10.5641	120	104	7	14	318.2	22.9167
2105	30	11	112	20	16.5	1922	37.2719	-23.9046	24.2738	-32.9479	10.5641	120	104	7	14	281.9	36
2106	30	11	127	24	18.4	2428	37.2719	-23.9046	24.2738	-32.9479	10.5641	120	104	7	14	336.7	22.9167
2107	30	11	132	14	9.2	2312	37.2719	-23.9046	24.2738	-32.9479	10.5641	120	104	7	14	327.5	28.1667
2108	30	11	132	32	18.4	2433	36.195	-23.5393	23.0574	-32.7693	10.7191	106	106	8	13	319.3	32.25
2109	30	11	112	20	14.4	2318	37.2719	-23.9046	24.2738	-32.9479	10.5641	120	104	7	14	315.7	30.5833
2110	30	11	140	34	17.3	2056	36.195	-23.5393	23.0574	-32.7693	10.7191	106	106	8	13	291.1	36.9167
2111	30	11	127	30	19.4	1918	36.195	-23.5393	23.0574	-32.7693	10.7191	106	106	8	13	281	36.9167
2112	30	11	107	20	17.5	1628	36.195	-23.5393	23.0574	-32.7693	10.7191	106	106	8	13	256.3	36.9167
2113	30	11	112	20	14.4	2487	37.2719	-23.9046	24.2738	-32.9479	10.5641	120	104	7	14	335.9	22.6667
2114	30	11	92	20	16.6	2027	36.195	-23.5393	23.0574	-32.7693	10.7191	106	106	8	13	296.3	31.75
2115	30	11	102	20	14.6	2587	37.2719	-23.9046	24.2738	-32.9479	10.5641	120	104	7	14	318.2	22.9167
2116	30	11	117	20	14.4	2378	37.2719	-23.9046	24.2738	-32.9479	10.5641	120	104	7	14	315.5	28.1667
2117	30	11	177	32	22.2	2414	37.2719	-23.9046	24.2738	-32.9479	10.5641	120	104	7	14	324.9	22.9167
2118	30	11	117	22	18.5	2268	36.195	-23.5393	23.0574	-32.7693	10.7191	106	106	8	13	303.5	31.75
2119	30	11	102	20	14.6	2334	37.2719	-23.9046	24.2738	-32.9479	10.5641	120	104	7	14	323.2	22.9167
2120	30	11	122	22	17.5	2443	37.2719	-23.9046	24.2738	-32.9479	10.5641	120	104	7	14	342.9	22.9167
2121	30	11	117	22	16.5	2277	36.195	-23.5393	23.0574	-32.7693	10.7191	106	106	8	13	304.9	32.25
2122	30	11	157	38	24.2	2348	37.2719	-23.9046	24.2738	-32.9479	10.5641	120	104	7	14	342.9	22.9167
2123	30	11	97	20	15.6	2128	36.195	-23.5393	23.0574	-32.7693	10.7191	106	106	8	13	296.3	31.75
2124	30	11	147	28	20.4	1889	37.2719	-23.9046	24.2738	-32.9479	10.5641	120	104	7	14	281.9	36
2125	30	11	147	22	17.3	2143	37.2719	-23.9046	24.2738	-32.9479	10.5641	120	104	7	14	309.5	36
2126	30	11	127	22	18.4	2137	37.2719	-23.9046	24.2738	-32.9479	10.5641	120	104	7	14	281.9	36
2127	30	11	132	28	21.4	2077	37.2719	-23.9046	24.2738	-32.9479	10.5641	120	104	7	14	282.1	36
2128	30	11	137	32	19.4	2166	36.195	-23.5393	23.0574	-32.7693	10.7191	106	106	8	13	291.1	36.9167
2129	30	11	82	16	14	2124	36.195	-23.5393	23.0574	-32.7693	10.7191	106	106	8	13	296.3	31.75
2130	30	11	142	22	16.3	2231	37.2719	-23.9046	24.2738	-32.9479	10.5641	120	104	7	14	309.5	36
2131	30	11	112	22	15	2495	37.2719	-23.9046	24.2738	-32.9479	10.5641	120	104	7	14	321	30.5833
2132	30	11	182	34	23.2	2438	37.2719	-23.9046	24.2738	-32.9479	10.5641	120	104	7	14	335.7	22.9167
2133	30	11	137	26	20.4	2109	36.195	-23.5393	23.0574	-32.7693	10.7191	106	106	8	13	285.7	31.75
2134	30	11	132	26	14.3	2376	37.2719	-23.9046	24.2738	-32.9479	10.5641	120	104	7	14	302.7	28.1667
2135	30	11	137	26	14.3	1923	37.2719	-23.9046	24.2738	-32.9479	10.5641	120	104	7	14	275.9	36
2136	30	11	132	22	14.3	2565	37.2719	-23.9046	24.2738	-32.9479	10.5641	120	104	7	14	324.4	28.1667
2137	30	11	117	24	19.6	2529	36.195	-23.5393	23.0574	-32.7693	10.7191	106	106	8	13	313.9	32.25
2138	30	11	117	30	19.6	1882	36.195	-23.5393	23.0574	-32.7693	10.7191	106	106	8	13	281.3	36.9167
2139	30	11	132	24	19.4	2326	36.195	-23.5393	23.0574	-32.7693	10.7191	106	106	8	13	321.7	32.25
2140	30	11	127	26	19.4	2392	36.195	-23.5393	23.0574	-32.7693	10.7191	106	106	8	13	312.5	32.25
2141	30	11	132	14	9.2	2221	37.2719	-23.9046	24.2738	-32.9479	10.5641	120	104	7	14	302.7	28.1667
2142	30	11	133	28	20.4	2084	36.195	-23.5393	23.0574	-32.7693	10.7191	106	106	8	13	291.1	36.9167
2143	30	11	134	34	20.4	2461	36.195	-23.5393	23.0574	-32.7693	10.7191	106	106	8	13	319.3	32.25
2144	30	11	117	22	15.5	2427	36.195	-23.5393	23.0574	-32.7693	10.7191	106	106	8	13	319.7	32.25
2145	30	11	109	20	14.4	2216	37.2719	-23.9046	24.2738	-32.9479	10.5641	120	104	7	14	310.4	36
2146	30	11	137	22	15.3	2417	37.2719	-23.9046	24.2738	-32.9479	10.5641	120	104	7	14	309.5	36
2147	30	11	132	20	11.2	2083	37.2719	-23.9046	24.2738	-32.9479	10.5641	120	104	7	14	282.1	28.1667
2148	30	11	147	32	19.4	2483	37.2719	-23.9046	24.2738	-32.9479	10.5641	120	104	7	14	342.9	22.9167
2149	30	11	127	22	16.3	2280	37.2719	-23.9046	24.2738	-32.9479	10.5641	120	104	7	14	294.9	36
2150	30	11	132	16	12	2541	36.195	-23.5393	23.0574	-32.7693	10.7191	106	106	8	13	326.8	32.25
2151	30	11	132	22	16.3	2501	37.2719	-23.9046	24.2738	-32.9479	10.5641	120	104	7	14	335.7	22.9167
2152	30	11	132	26	20.4	2026	37.2719	-23.9046	24.2738	-32.9479	10.5641	120	104	7	14	275.9	36
2153	30	11	137	28	16.3	2328	37.2719	-23.9046	24.2738	-32.9479	10.5641	120	104	7	14	315.6	28.1667
2154	30	11	132	22	17.3	2512	37.2719	-23.9046	24.2738	-32.9479	10.5641	120	104	7	14	351	22.9167
2155	30	11	142	22	17.3	2398	37.2719	-23.9046	24.2738	-32.9479	10.5641	120	104	7	14	310.4	36
2156	30	11	147	24	20.4	2157	36.195	-23.5393	23.0574	-32.7693	10.7191	106	106	8	13	284.7	31.75
2157	30	11	117	22	16.5	2602	37.2719	-23.9046	24.2738	-32.9479	10.5641	120	104	7	14	335.9	22.6667
2158	30	11	132	30	19.4	2395	36.195	-23.5393	23.0574	-32.7693	10.7191	106	106	8	13	290.4	32.25
2159	30	11	117	22	17.5	1898	36.195	-23.5393	23.0574	-32.7693	10.7191	106	106	8	13	281	36.9167
2160	30	11	112	24	17	1846	36.195	-23.5393	23.0574	-32.7693	10.7191	106	106	8	13	284.7	31.75
2161	30	11	87	18	15.6	2170	36.195	-23.5393	23.0574	-32.7693	10.7191	106	106	8	13	295.8	31.75
2162	30	11	117	24	17.5	2071	36.195	-23.5393	23.0574	-32.7693	10.7191	106	106	8	13	295.8	31.75
2163	30	11	137	30	18.4	2299	37.2719	-23.9046	24.2738	-32.9479	10.5641	120	104	7	14	315.6	28.1667
2164	30	11	132	26	19	2247	37.2719	-23.9046	24.2738	-32.9479	10.5641	120	104	7	14	302.7	28.1667
2165	30	11	147	24	18.4	1686	36.195	-23.5393	23.0574	-32.7693	10.7191	106	106	8	13	274.7	36.9167
2166	30	11	112	22	15	2513	37.2719	-23.9046	24.2738	-32.9479	10.5641	120	104	7	14	324.4	28.1667
2167	30	11	142	22	14	1977	37.2719	-23.9046	24.2738	-32.9479	10.5641	120	104	7	14	294.9	36
2168	30	11	132	20	10.2	2163	37.2719	-23.9046	24.2738	-32.9479	10.5641	120	104	7	14	293.4	28.1667
2169	30	11	117	22	14.4	2477	36.195	-23.5393	23.0574	-32.7693	10.7191	106	106	8	13	319.7	32.25
2170	30	11	137	26	18.4	2331	37.2719	-23.9046	24.2738	-32.9479	10.5641	120	104	7	14	310.4	36
2171	30	11	142	24	17	2600	37.2719	-23.9046	24.2738	-32.9479	10.5641	120	104	7	14	345.5	28.1667
2172	30	11	127	28	16.3	2163	36.195	-23.5393	23.0574	-32.7693	10.7191	106	106	8	13	290.4	32.25
2173	30	11	137	24	17.3	2629	37.2719	-23.9046	24.2738	-32.9479	10.5641	120	104	7	14	342.9	22.9167
2174	30	11	137	28	19.4	2046	37.2719	-23.9046	24.2738	-32.9479	10.5641	120	104	7	14	302.7	28.1667
2175	30	11	142	20	14	2558	36.195	-23.5393	23.0574	-32.7693	10.7191	106	106	8	13	309.4	32.25
2176	30	11	143	30	19.4	2148	37.2719	-23.9046	24.2738	-32.9479	10.5641	120	104	7	14	294.9	36
2177	30	11	127	26	19.4	2524	36.195	-23.5393	23.0574	-32.7693	10.7191	106	106	8	13	326.5	32.25
2178	30	11	137	22	16.3	2447	37.2719	-23.9046	24.2738	-32.9479	10.5641	120	104	7	14	320.9	30.5833
2179	30	11	117	22	17.5	2390	36.195	-23.5393	23.0574	-32.7693	10.7191	106	106	8	13	314.4	31.75
2180	30	11	132	22	16.3	2620	37.2719	-23.9046	24.2738	-32.9479	10.5641	120	104	7	14	351	22.9167
2181	30	11	117	26	18.5	1921	36.195	-23.5393	23.0574	-32.7693	10.7191	106	106	8	13	295.8	31.75
2182	30	11	137	30	18.4	2143	36.195	-23.5393	23.0574	-32.7693	10.7191	106	106	8	13	290.4	36.9167
2183	30	11	127	20	15.3	2486	37.2719	-23.9046	24.2738	-32.9479	10.5641	120	104	7	14	335.7	22.9167
2184	30	11	126	30	19.4	1869	36.195	-23.5393	23.0574	-32.7693	10.7191	106	106	8	13	263.3	36.9167
2185	30	11	142	32	19.4	2146	37.2719	-23.9046	24.2738	-32.9479	10.5641	120	104	7	14	309.5	36
2186	30	11	110	20	14.4	2463	37.2719	-23.9046	24.2738	-32.9479	10.5641	120	104	7	14	338.5	30.5833
2187	30	11	147	20	18.4	2084	36.195	-23.5393	23.0574	-32.7693	10.7191	106	106	8	13	283.6	32.25
2188	30	11	132	24	15.3	2546	37.2719	-23.9046	24.2738	-32.9479	10.5641	120	104	7	14	335.7	28.1667
2189	30	11	162	30	20.2	2556	37.2719	-23.9046	24.2738	-32.9479	10.5641	120	104	7	14	335.7	28.1667
2190	30	11	139	34	21.4	1855	37.2719	-23.9046	24.2738	-32.9479	10.5641	120	104	7	14	294.9	36
2191	30	11	137	32	20.4	2526	37.2719	-23.9046	24.2738	-32.9479	10.5641	120	104	7	14	342.9	22.9167
2192	30	11	132	22	14	2565	37.2719	-23.9046	24.2738	-32.9479	10.5641	120	104	7	14	345.5	28.1667
2193	30	11	157	30	22.2	2370	37.2719	-23.9046	24.2738	-32.9479	10.5641	120	104	7	14	315.6	28.1667
2194	30	11	152	30	21.4	2427	37.2719	-23.9046	24.2738	-32.9479	10.5641	120	104	7	14	332.8	28.1667
2195	30	11	137	28	15.3	2023	37.2719	-23.9046	24.2738	-32.9479	10.5641	120	104	7	14	295.9	36
2196	30	11	142	24	18.4	2314	37.2719	-23.9046	24.2738	-32.9479	10.5641	120	104	7	14	323.9	28.1667
2197	30	11	117	22	14.4	2035	36.195	-23.5393	23.0574	-32.7693	10.7191	106	106	8	13	281	36.9167
2198	30	11	147	28	19.4	2440	37.2719	-23.9046	24.2738	-32.9479	10.5641	120	104	7	14	332.8	28.1667
2199	30	11	147	28	18.4	2458	37.2719	-23.9046	24.2738	-32.9479	10.5641	120	104	7	14	323.9	28.1667
2200	30	11	152	28	19.4	2360	37.2719	-23.9046	24.2738	-32.9479	10.5641	120	104	7	14	301	28.1667
2201	30	11	147	24	19.4	2544	37.2719	-23.9046	24.2738	-32.9479	10.5641	120	104	7	14	338.5	28.1667
2202	30	11	142	18	14	2389	36.195	-23.5393	23.0574	-32.7693	10.7191	106	106	8	13	297.4	32.25
2203	30	11	117	22	17.5	2509	37.2719	-23.9046	24.2738	-32.9479	10.5641	120	104	7	14	338.5	28.1667
2204	30	11	52	12	7.4	2115	36.195	-23.5393	23.0574	-32.7693	10.7191	106	106	8	13	281.3	31.75
2205	30	11	117	24	18.5	2510	36.195	-23.5393	23.0574	-32.7693	10.7191	106	106	8	13	321.7	32.25
2206	30	11	157	30	21.2	2316	37.2719	-23.9046	24.2738	-32.9479	10.5641	120	104	7	14	301	28.1667
2207	30	11	132	20	12	2651	37.2719	-23.9046	24.2738	-32.9479	10.5641	120	104	7	14	358.1	22.6667
2208	30	11	117	22	14.4	2038	37.2719	-23.9046	24.2738	-32.9479	10.5641	120	104	7	14	295.9	36
2209	30	11	122	18	15	2629	37.2719	-23.9046	24.2738	-32.9479	10.5641	120	104	7	14	364.8	22.9167
2210	30	11	137	26	20.4	2471	36.195	-23.5393	23.0574	-32.7693	10.7191	106	106	8	13	326.5	32.25
2211	30	11	133	32	18.4	1947	36.195	-23.5393	23.0574	-32.7693	10.7191	106	106	8	13	273.8	32.25
2212	30	11	42	12	6.4	1874	37.2719	-23.9046	24.2738	-32.9479	10.5641	120	104	7	14	293.4	28.1667
2213	30	11	127	26	15.3	1956	36.195	-23.5393	23.0574	-32.7693	10.7191	106	106	8	13	290.4	36.9167
2214	30	11	122	18	15	2668	37.2719	-23.9046	24.2738	-32.9479	10.5641	120	104	7	14	364.8	22.9167
2215	30	11	152	28	20.4	2515	37.2719	-23.9046	24.2738	-32.9479	10.5641	120	104	7	14	332.8	28.1667
2216	30	11	137	34	22.4	1962	37.2719	-23.9046	24.2738	-32.9479	10.5641	120	104	7	14	287.7	36
2217	30	11	117	14	13.4	1677	36.195	-23.5393	23.0574	-32.7693	10.7191	106	106	8	13	273.3	36.9167
2218	30	11	147	20	16.3	2197	36.195	-23.5393	23.0574	-32.7693	10.7191	106	106	8	13	283.6	32.25
2219	30	11	132	20	14	2667	37.2719	-23.9046	24.2738	-32.9479	10.5641	120	104	7	14	367.8	22
2220	30	11	142	28	19.4	2222	37.2719	-23.9046	24.2738	-32.9479	10.5641	120	104	7	14	309.2	36
2221	30	11	152	24	19.4	2140	37.2719	-23.9046	24.2738	-32.9479	10.5641	120	104	7	14	301	28.1667
2222	30	11	97	20	16.6	2188	36.195	-23.5393	23.0574	-32.7693	10.7191	106	106	8	13	301.5	31.75
2223	30	11	142	24	18.4	2002	36.195	-23.5393	23.0574	-32.7693	10.7191	106	106	8	13	281.2	36.9167
2224	30	11	132	20	15	2679	37.2719	-23.9046	24.2738	-32.9479	10.5641	120	104	7	14	364.8	22.9167
2225	30	11	117	22	16.5	1804	36.195	-23.5393	23.0574	-32.7693	10.7191	106	106	8	13	273.3	36.9167
2226	30	11	142	22	17.3	2470	37.2719	-23.9046	24.2738	-32.9479	10.5641	120	104	7	14	346.5	30.5833
2227	30	11	137	24	15	2430	36.195	-23.5393	23.0574	-32.7693	10.7191	106	106	8	13	318.3	32.25
2228	30	11	117	22	17.5	1898	36.195	-23.5393	23.0574	-32.7693	10.7191	106	106	8	13	273.3	36.9167
2229	30	11	107	20	15.5	1890	37.2719	-23.9046	24.2738	-32.9479	10.5641	120	104	7	14	282.3	36
2230	30	11	137	24	17.3	1979	37.2719	-23.9046	24.2738	-32.9479	10.5641	120	104	7	14	279.7	28.1667
2231	30	11	82	18	13	2602	36.195	-23.5393	23.0574	-32.7693	10.7191	106	106	8	13	331.6	32.25
2232	30	11	127	32	19.4	2238	36.195	-23.5393	23.0574	-32.7693	10.7191	106	106	8	13	303.8	31.75
2233	30	11	117	20	14.4	1909	36.195	-23.5393	23.0574	-32.7693	10.7191	106	106	8	13	295.7	29.5
2234	30	11	103	16	9	2121	37.2719	-23.9046	24.2738	-32.9479	10.5641	120	104	7	14	287.7	36
2235	30	11	112	22	15	2064	37.2719	-23.9046	24.2738	-32.9479	10.5641	120	104	7	14	295.9	36
2236	30	11	137	32	17.3	2213	37.2719	-23.9046	24.2738	-32.9479	10.5641	120	104	7	14	287.7	36
2237	30	11	117	22	17.5	2241	36.195	-23.5393	23.0574	-32.7693	10.7191	106	106	8	13	295.6	31.75
2238	30	11	137	30	18.4	2627	37.2719	-23.9046	24.2738	-32.9479	10.5641	120	104	7	14	355.2	22.9167
2239	30	11	147	30	16.3	2274	37.2719	-23.9046	24.2738	-32.9479	10.5641	120	104	7	14	287.7	36
2240	30	11	117	24	19.6	1939	37.2719	-23.9046	24.2738	-32.9479	10.5641	120	104	7	14	282.3	28.1667
2241	30	11	117	32	19.6	2304	36.195	-23.5393	23.0574	-32.7693	10.7191	106	106	8	13	303.8	36.9167
2242	30	11	127	26	20.4	2582	36.195	-23.5393	23.0574	-32.7693	10.7191	106	106	8	13	331.6	32.25
2243	30	11	122	18	15	2616	37.2719	-23.9046	24.2738	-32.9479	10.5641	120	104	7	14	356.7	22.9167
2244	30	11	137	20	16.3	2028	36.195	-23.5393	23.0574	-32.7693	10.7191	106	106	8	13	296.4	36.9167
2245	30	11	137	24	17.3	2553	37.2719	-23.9046	24.2738	-32.9479	10.5641	120	104	7	14	327.8	30.5833
2246	30	11	142	28	16	2089	37.2719	-23.9046	24.2738	-32.9479	10.5641	120	104	7	14	309.2	36
2247	30	11	147	22	15.3	2539	36.195	-23.5393	23.0574	-32.7693	10.7191	106	106	8	13	318.3	32.25
2248	30	11	142	26	15	2496	37.2719	-23.9046	24.2738	-32.9479	10.5641	120	104	7	14	320.9	36
2249	30	11	102	20	17.7	2109	36.195	-23.5393	23.0574	-32.7693	10.7191	106	106	8	13	301.5	31.75
2250	30	11	132	22	15.3	2628	37.2719	-23.9046	24.2738	-32.9479	10.5641	120	104	7	14	355.2	22.9167
2251	30	11	82	16	15	2410	36.195	-23.5393	23.0574	-32.7693	10.7191	106	106	8	13	326.5	31.75
2252	30	11	142	30	19.4	2481	37.2719	-23.9046	24.2738	-32.9479	10.5641	120	104	7	14	327.8	30.5833
2253	30	11	147	28	17.3	2300	37.2719	-23.9046	24.2738	-32.9479	10.5641	120	104	7	14	304.1	36
2254	30	11	187	28	21.2	2308	37.2719	-23.9046	24.2738	-32.9479	10.5641	120	104	7	14	304.1	30.6667
2255	30	11	142	20	16	1881	36.195	-23.5393	23.0574	-32.7693	10.7191	106	106	8	13	283.6	32.25
2256	30	11	117	14	12.4	2188	36.195	-23.5393	23.0574	-32.7693	10.7191	106	106	8	13	295.7	29.5
2257	30	11	112	22	14	1741	36.195	-23.5393	23.0574	-32.7693	10.7191	106	106	8	13	273.8	36.9167
2258	30	11	147	22	18.4	2037	36.195	-23.5393	23.0574	-32.7693	10.7191	106	106	8	13	296.4	36.9167
2259	30	11	150	22	17.3	2426	36.195	-23.5393	23.0574	-32.7693	10.7191	106	106	8	13	318.3	32.25
2260	30	11	117	22	17.5	1931	36.195	-23.5393	23.0574	-32.7693	10.7191	106	106	8	13	287.6	36.9167
2261	30	11	147	32	19.4	2371	37.2719	-23.9046	24.2738	-32.9479	10.5641	120	104	7	14	329.7	36
2262	30	11	152	28	20.4	2313	37.2719	-23.9046	24.2738	-32.9479	10.5641	120	104	7	14	313.7	30.6667
2263	30	11	112	14	10	2236	36.195	-23.5393	23.0574	-32.7693	10.7191	106	106	8	13	320.9	31.75
2264	30	11	137	30	20.4	2139	37.2719	-23.9046	24.2738	-32.9479	10.5641	120	104	7	14	278.3	33.9167
2265	30	11	122	26	17.5	2097	37.2719	-23.9046	24.2738	-32.9479	10.5641	120	104	7	14	295.8	30.6667
2266	30	11	142	32	18.4	2119	37.2719	-23.9046	24.2738	-32.9479	10.5641	120	104	7	14	304.1	36
2267	30	11	147	24	18.4	2340	36.195	-23.5393	23.0574	-32.7693	10.7191	106	106	8	13	315.7	32.25
2268	30	11	147	22	18.4	2287	36.195	-23.5393	23.0574	-32.7693	10.7191	106	106	8	13	323.9	31.75
2269	30	11	139	34	19.4	2417	37.2719	-23.9046	24.2738	-32.9479	10.5641	120	104	7	14	329.7	30.5833
2270	30	11	137	14	12.2	2392	36.195	-23.5393	23.0574	-32.7693	10.7191	106	106	8	13	295.6	31.75
2271	30	11	147	18	16.3	2112	36.195	-23.5393	23.0574	-32.7693	10.7191	106	106	8	13	303.8	36.9167
2272	30	11	97	20	16.6	2369	36.195	-23.5393	23.0574	-32.7693	10.7191	106	106	8	13	326.5	31.75
2273	30	11	97	20	14.6	2248	37.2719	-23.9046	24.2738	-32.9479	10.5641	120	104	7	14	295.9	36
2274	30	11	137	22	17.3	2073	36.195	-23.5393	23.0574	-32.7693	10.7191	106	106	8	13	312	29.5
2275	30	11	147	24	21.4	2192	36.195	-23.5393	23.0574	-32.7693	10.7191	106	106	8	13	287.9	35.6667
2276	30	11	147	22	11	2624	36.195	-23.5393	23.0574	-32.7693	10.7191	106	106	8	13	315.7	35.6667
2277	30	11	187	28	19.2	2251	37.2719	-23.9046	24.2738	-32.9479	10.5641	120	104	7	14	313.7	30.6667
2278	30	11	112	22	15	2235	37.2719	-23.9046	24.2738	-32.9479	10.5641	120	104	7	14	314.1	30.6667
2279	30	11	147	20	17.3	2371	36.195	-23.5393	23.0574	-32.7693	10.7191	106	106	8	13	314.8	29.5
2280	30	11	137	24	18.4	2349	36.195	-23.5393	23.0574	-32.7693	10.7191	106	106	8	13	314.6	24.25
2281	30	11	147	34	19.4	2557	37.2719	-23.9046	24.2738	-32.9479	10.5641	120	104	7	14	329.7	29
2282	30	11	152	36	19.4	2339	37.2719	-23.9046	24.2738	-32.9479	10.5641	120	104	7	14	304.1	30.6667
2283	30	11	137	20	14.3	2518	36.195	-23.5393	23.0574	-32.7693	10.7191	106	106	8	13	323.9	24.25
2284	30	11	137	16	9.2	2498	37.2719	-23.9046	24.2738	-32.9479	10.5641	120	104	7	14	319.3	33.9167
2285	30	11	117	22	16.5	2112	36.195	-23.5393	23.0574	-32.7693	10.7191	106	106	8	13	290.8	29.5
2286	30	11	147	18	14.3	2147	36.195	-23.5393	23.0574	-32.7693	10.7191	106	106	8	13	287.9	35.6667
2287	30	11	112	22	16	1868	37.2719	-23.9046	24.2738	-32.9479	10.5641	120	104	7	14	295.8	33.9167
2288	30	11	172	30	14.1	2288	37.2719	-23.9046	24.2738	-32.9479	10.5641	120	104	7	14	304.1	30.6667
2289	30	11	157	28	21.2	1979	36.195	-23.5393	23.0574	-32.7693	10.7191	106	106	8	13	269.4	35.6667
2290	30	11	147	34	19.4	2512	37.2719	-23.9046	24.2738	-32.9479	10.5641	120	104	7	14	340.4	29
2291	30	11	122	22	14.4	2016	37.2719	-23.9046	24.2738	-32.9479	10.5641	120	104	7	14	295.8	33.9167
2292	30	11	112	22	16.5	2102	36.195	-23.5393	23.0574	-32.7693	10.7191	106	106	8	13	295.7	29.5
2293	30	11	137	20	12.2	2332	36.195	-23.5393	23.0574	-32.7693	10.7191	106	106	8	13	320.9	24.25
2294	30	11	127	16	8.2	1929	37.2719	-23.9046	24.2738	-32.9479	10.5641	120	104	7	14	278.3	33.9167
2295	30	11	137	22	13.3	2439	36.195	-23.5393	23.0574	-32.7693	10.7191	106	106	8	13	320.9	24.25
2296	30	11	147	30	17.3	2442	37.2719	-23.9046	24.2738	-32.9479	10.5641	120	104	7	14	304.1	30.6667
2297	30	11	137	14	13.3	2415	36.195	-23.5393	23.0574	-32.7693	10.7191	106	106	8	13	312	29.5
2298	30	11	97	22	17.7	2346	36.195	-23.5393	23.0574	-32.7693	10.7191	106	106	8	13	326.5	24.25
2299	30	11	87	20	14.6	2334	37.2719	-23.9046	24.2738	-32.9479	10.5641	120	104	7	14	314.1	30.6667
2300	30	11	112	14	10	2592	36.195	-23.5393	23.0574	-32.7693	10.7191	106	106	8	13	320.9	24.25
2301	30	11	117	24	17.5	2190	36.195	-23.5393	23.0574	-32.7693	10.7191	106	106	8	13	300.5	29.5
2302	30	11	117	14	11.3	2496	36.195	-23.5393	23.0574	-32.7693	10.7191	106	106	8	13	314.6	24.25
2303	30	11	152	34	24.5	2263	37.2719	-23.9046	24.2738	-32.9479	10.5641	120	104	7	14	296	33.9167
2304	30	11	112	22	16	1951	37.2719	-23.9046	24.2738	-32.9479	10.5641	120	104	7	14	295.8	33.9167
2305	30	11	102	22	17.7	2288	37.2719	-23.9046	24.2738	-32.9479	10.5641	120	104	7	14	295.8	30.6667
2306	30	11	117	22	16.5	1990	37.2719	-23.9046	24.2738	-32.9479	10.5641	120	104	7	14	311.2	33.9167
2307	30	11	112	20	17	2004	36.195	-23.5393	23.0574	-32.7693	10.7191	106	106	8	13	300.5	35.6667
2308	30	11	157	28	19.2	2317	36.195	-23.5393	23.0574	-32.7693	10.7191	106	106	8	13	287.9	35.6667
2309	30	11	147	30	17.3	2493	37.2719	-23.9046	24.2738	-32.9479	10.5641	120	104	7	14	304.1	30.6667
2310	30	11	172	30	12.1	2344	37.2719	-23.9046	24.2738	-32.9479	10.5641	120	104	7	14	304.1	30.6667
2311	30	11	117	20	16.5	2446	36.195	-23.5393	23.0574	-32.7693	10.7191	106	106	8	13	337.7	24.25
2312	30	11	117	22	14.4	2153	36.195	-23.5393	23.0574	-32.7693	10.7191	106	106	8	13	319	29.5
2313	30	11	187	26	17.2	2483	37.2719	-23.9046	24.2738	-32.9479	10.5641	120	104	7	14	339.2	30.6667
2314	30	11	137	24	13	2380	36.195	-23.5393	23.0574	-32.7693	10.7191	106	106	8	13	295.4	35.6667
2315	30	11	117	14	11.3	2512	36.195	-23.5393	23.0574	-32.7693	10.7191	106	106	8	13	337.7	24.25
2316	30	11	97	20	14.6	2411	36.195	-23.5393	23.0574	-32.7693	10.7191	106	106	8	13	319	29.5
2317	30	11	147	20	18.4	2554	37.2719	-23.9046	24.2738	-32.9479	10.5641	120	104	7	14	324	30.6667
2318	30	11	177	32	15.2	2422	37.2719	-23.9046	24.2738	-32.9479	10.5641	120	104	7	14	320.5	30.6667
2319	30	11	112	22	15	2531	36.195	-23.5393	23.0574	-32.7693	10.7191	106	106	8	13	319	29.5
2320	30	11	132	26	17.3	2215	37.2719	-23.9046	24.2738	-32.9479	10.5641	120	104	7	14	284.5	33.9167
2321	30	11	117	26	22.7	1919	37.2719	-23.9046	24.2738	-32.9479	10.5641	120	104	7	14	293	33.9167
2322	30	11	117	14	6.2	2010	37.2719	-23.9046	24.2738	-32.9479	10.5641	120	104	7	14	284.5	33.9167
2323	30	11	107	18	11.3	2349	36.195	-23.5393	23.0574	-32.7693	10.7191	106	106	8	13	335.9	29.5
2324	30	11	147	30	19.4	2148	36.195	-23.5393	23.0574	-32.7693	10.7191	106	106	8	13	295.4	35.6667
2325	30	11	117	20	15.5	2362	36.195	-23.5393	23.0574	-32.7693	10.7191	106	106	8	13	319	29.5
2326	30	11	177	32	15.2	2471	37.2719	-23.9046	24.2738	-32.9479	10.5641	120	104	7	14	320.5	30.6667
2327	30	11	117	20	13.4	2378	36.195	-23.5393	23.0574	-32.7693	10.7191	106	106	8	13	319	29.5
2328	30	11	102	20	13.5	2135	37.2719	-23.9046	24.2738	-32.9479	10.5641	120	104	7	14	293	33.9167
2329	30	11	112	18	14	2029	37.2719	-23.9046	24.2738	-32.9479	10.5641	120	104	7	14	293	33.9167
2330	30	11	107	12	8	2626	36.195	-23.5393	23.0574	-32.7693	10.7191	106	106	8	13	337.7	24.25
2331	30	11	162	34	24.2	1884	37.2719	-23.9046	24.2738	-32.9479	10.5641	120	104	7	14	284.5	33.9167
2332	30	11	142	28	19.4	2070	36.195	-23.5393	23.0574	-32.7693	10.7191	106	106	8	13	275.9	35.6667
2333	30	11	92	18	14.6	2212	37.2719	-23.9046	24.2738	-32.9479	10.5641	120	104	7	14	293	33.9167
2334	30	11	147	22	13.3	2573	37.2719	-23.9046	24.2738	-32.9479	10.5641	120	104	7	14	327.2	29
2335	30	11	112	24	18.5	2136	36.195	-23.5393	23.0574	-32.7693	10.7191	106	106	8	13	311.3	29.5
2336	30	11	137	28	17.3	2166	37.2719	-23.9046	24.2738	-32.9479	10.5641	120	104	7	14	284.5	33.9167
2337	30	11	117	24	18.5	2350	36.195	-23.5393	23.0574	-32.7693	10.7191	106	106	8	13	311.3	35.6667
2338	30	11	147	22	16.3	2220	36.195	-23.5393	23.0574	-32.7693	10.7191	106	106	8	13	286.7	35.6667
2339	30	11	152	18	15.3	2070	36.195	-23.5393	23.0574	-32.7693	10.7191	106	106	8	13	279.5	35.6667
2340	30	11	137	34	18.4	2414	37.2719	-23.9046	24.2738	-32.9479	10.5641	120	104	7	14	303.7	33.9167
2341	30	11	124	24	18.5	2261	37.2719	-23.9046	24.2738	-32.9479	10.5641	120	104	7	14	316.4	30.6667
2342	30	11	122	24	19.6	2405	37.2719	-23.9046	24.2738	-32.9479	10.5641	120	104	7	14	316.4	33.9167
2343	30	11	177	30	25.3	2639	37.2719	-23.9046	24.2738	-32.9479	10.5641	120	104	7	14	341.3	33.9167
2344	30	11	77	16	13.7	2008	37.2719	-23.9046	24.2738	-32.9479	10.5641	120	104	7	14	285.9	33.9167
2345	30	11	162	30	13.1	2629	37.2719	-23.9046	24.2738	-32.9479	10.5641	120	104	7	14	327.7	30.6667
2346	30	11	147	22	17.3	2355	36.195	-23.5393	23.0574	-32.7693	10.7191	106	106	8	13	304	29
2347	30	11	142	20	13.3	2490	37.2719	-23.9046	24.2738	-32.9479	10.5641	120	104	7	14	313.6	29
2348	30	11	177	30	13.1	2536	37.2719	-23.9046	24.2738	-32.9479	10.5641	120	104	7	14	337	30.6667
2349	30	11	137	22	14.3	2502	36.195	-23.5393	23.0574	-32.7693	10.7191	106	106	8	13	313.6	29
2350	30	11	112	26	19.6	2152	36.195	-23.5393	23.0574	-32.7693	10.7191	106	106	8	13	295.8	35.6667
2351	30	11	129	22	16.3	2067	37.2719	-23.9046	24.2738	-32.9479	10.5641	120	104	7	14	286.3	33.9167
2352	30	11	152	26	9	2577	37.2719	-23.9046	24.2738	-32.9479	10.5641	120	104	7	14	337	30.6667
2353	30	11	142	22	17.3	2349	37.2719	-23.9046	24.2738	-32.9479	10.5641	120	104	7	14	303.7	33.9167
2354	30	11	142	22	16.3	2493	36.195	-23.5393	23.0574	-32.7693	10.7191	106	106	8	13	304	35.6667
2355	30	11	152	24	17.3	2397	36.195	-23.5393	23.0574	-32.7693	10.7191	106	106	8	13	286.7	35.6667
2356	30	11	157	22	15.2	2027	36.195	-23.5393	23.0574	-32.7693	10.7191	106	106	8	13	295.8	35.6667
2357	30	11	147	20	14.3	2400	36.195	-23.5393	23.0574	-32.7693	10.7191	106	106	8	13	286.7	35.6667
2358	30	11	132	32	18.4	2414	37.2719	-23.9046	24.2738	-32.9479	10.5641	120	104	7	14	314.2	33.9167
2359	30	11	102	18	14.6	2088	37.2719	-23.9046	24.2738	-32.9479	10.5641	120	104	7	14	285.9	33.9167
2360	30	11	105	20	14.4	1984	37.2719	-23.9046	24.2738	-32.9479	10.5641	120	104	7	14	303.9	33.9167
2361	30	11	132	26	18	2250	36.195	-23.5393	23.0574	-32.7693	10.7191	106	106	8	13	295.8	35.6667
2362	30	11	97	16	12.5	1948	37.2719	-23.9046	24.2738	-32.9479	10.5641	120	104	7	14	285.9	33.9167
2363	30	11	172	28	9	2635	37.2719	-23.9046	24.2738	-32.9479	10.5641	120	104	7	14	327.7	30.6667
2364	30	11	87	18	14.6	2465	37.2719	-23.9046	24.2738	-32.9479	10.5641	120	104	7	14	327.9	30.6667
2365	30	11	117	26	18.5	2189	37.2719	-23.9046	24.2738	-32.9479	10.5641	120	104	7	14	286.3	33.9167
2366	30	11	117	20	15.5	2439	37.2719	-23.9046	24.2738	-32.9479	10.5641	120	104	7	14	333.4	33.9167
2367	30	11	162	28	16.2	1995	36.195	-23.5393	23.0574	-32.7693	10.7191	106	106	8	13	279.5	35.6667
2368	30	11	102	18	11.4	2043	37.2719	-23.9046	24.2738	-32.9479	10.5641	120	104	7	14	285.9	33.9167
2369	30	11	152	22	16.3	2316	36.195	-23.5393	23.0574	-32.7693	10.7191	106	106	8	13	286.7	35.6667
2370	30	11	117	22	16.5	2045	37.2719	-23.9046	24.2738	-32.9479	10.5641	120	104	7	14	289.9	33.9167
2371	30	11	157	24	17.2	1909	36.195	-23.5393	23.0574	-32.7693	10.7191	106	106	8	13	297.1	35.6667
2372	30	11	117	20	16.5	2504	36.195	-23.5393	23.0574	-32.7693	10.7191	106	106	8	13	330.4	29.5
2373	30	11	92	16	13	2184	37.2719	-23.9046	24.2738	-32.9479	10.5641	120	104	7	14	293	33.9167
2374	30	11	147	36	26.5	2524	37.2719	-23.9046	24.2738	-32.9479	10.5641	120	104	7	14	317	33.9167
2375	30	11	105	20	12.4	2094	37.2719	-23.9046	24.2738	-32.9479	10.5641	120	104	7	14	293	33.9167
2376	30	11	152	22	14.3	2329	36.195	-23.5393	23.0574	-32.7693	10.7191	106	106	8	13	308.7	35.6667
2377	30	11	152	20	15.3	2368	36.195	-23.5393	23.0574	-32.7693	10.7191	106	106	8	13	297.1	35.6667
2378	30	11	157	22	19.2	2212	37.2719	-23.9046	24.2738	-32.9479	10.5641	120	104	7	14	288.7	33.9167
2379	30	11	172	34	26.3	2533	37.2719	-23.9046	24.2738	-32.9479	10.5641	120	104	7	14	317	33.9167
2380	30	11	160	30	15.2	2263	36.195	-23.5393	23.0574	-32.7693	10.7191	106	106	8	13	277.3	35.6667
2381	30	11	122	24	14.4	2625	37.2719	-23.9046	24.2738	-32.9479	10.5641	120	104	7	14	325.8	29
2382	30	11	187	36	25.3	2362	37.2719	-23.9046	24.2738	-32.9479	10.5641	120	104	7	14	317	33.9167
2383	30	11	162	30	17.2	2125	36.195	-23.5393	23.0574	-32.7693	10.7191	106	106	8	13	297.1	35.6667
2384	30	11	129	26	17.3	2157	37.2719	-23.9046	24.2738	-32.9479	10.5641	120	104	7	14	289.9	33.9167
2385	30	11	152	28	16.3	2001	36.195	-23.5393	23.0574	-32.7693	10.7191	106	106	8	13	277.3	35.6667
2386	30	11	127	26	15.3	2549	37.2719	-23.9046	24.2738	-32.9479	10.5641	120	104	7	14	325.8	29
2387	30	11	132	28	19.4	2207	37.2719	-23.9046	24.2738	-32.9479	10.5641	120	104	7	14	289.9	33.9167
2388	30	11	117	22	14.4	2353	37.2719	-23.9046	24.2738	-32.9479	10.5641	120	104	7	14	301.8	29
2389	30	11	135	24	15.3	2328	36.195	-23.5393	23.0574	-32.7693	10.7191	106	106	8	13	277.3	35.6667
2390	30	11	87	16	11.4	2375	37.2719	-23.9046	24.2738	-32.9479	10.5641	120	104	7	14	293	33.9167
2391	30	11	117	20	13.4	2363	37.2719	-23.9046	24.2738	-32.9479	10.5641	120	104	7	14	313.4	30.6667
2392	30	11	112	22	16.5	2129	37.2719	-23.9046	24.2738	-32.9479	10.5641	120	104	7	14	289.9	33.9167
2393	30	11	122	22	14.4	2349	36.195	-23.5393	23.0574	-32.7693	10.7191	106	106	8	13	299.7	29
2394	30	11	132	18	18	3237	37.2719	-23.9046	24.2738	-32.9479	10.5641	120	104	7	14	408.6	19.25
2395	30	11	157	32	19.2	2467	37.2719	-23.9046	24.2738	-32.9479	10.5641	120	104	7	14	307.7	29
2396	30	11	107	22	15.5	2301	37.2719	-23.9046	24.2738	-32.9479	10.5641	120	104	7	14	308	30.6667
2397	30	11	112	22	14	2280	36.195	-23.5393	23.0574	-32.7693	10.7191	106	106	8	13	300.7	35.6667
2398	30	11	112	20	12.4	2265	37.2719	-23.9046	24.2738	-32.9479	10.5641	120	104	7	14	313.9	33.9167
2399	30	11	157	28	17.2	2429	37.2719	-23.9046	24.2738	-32.9479	10.5641	120	104	7	14	319.9	29
2400	30	11	137	30	18.4	2048	37.2719	-23.9046	24.2738	-32.9479	10.5641	120	104	7	14	283.5	33.9167
2401	30	11	112	16	16	2384	37.2719	-23.9046	24.2738	-32.9479	10.5641	120	104	7	14	312.2	33.9167
2402	30	11	97	16	13.5	1993	37.2719	-23.9046	24.2738	-32.9479	10.5641	120	104	7	14	283.5	33.9167
2403	30	11	137	32	19.4	2894	37.2719	-23.9046	24.2738	-32.9479	10.5641	120	104	7	14	370.2	19.25
2404	30	11	117	20	15	2143	36.195	-23.5393	23.0574	-32.7693	10.7191	106	106	8	13	275.1	35.6667
2405	30	11	117	24	15.5	2256	36.195	-23.5393	23.0574	-32.7693	10.7191	106	106	8	13	283.5	35.6667
2406	30	11	137	28	18.4	3020	37.2719	-23.9046	24.2738	-32.9479	10.5641	120	104	7	14	387.6	19.25
2407	30	11	187	36	23.2	2370	37.2719	-23.9046	24.2738	-32.9479	10.5641	120	104	7	14	307.1	33.9167
2408	30	11	117	22	17.5	2051	37.2719	-23.9046	24.2738	-32.9479	10.5641	120	104	7	14	291.4	33.9167
2409	30	11	112	22	13	2138	36.195	-23.5393	23.0574	-32.7693	10.7191	106	106	8	13	283.5	35.6667
2410	30	11	137	26	17.3	3450	37.2719	-23.9046	24.2738	-32.9479	10.5641	120	104	7	14	425.5	17.0833
2411	30	11	132	22	16	3009	37.2719	-23.9046	24.2738	-32.9479	10.5641	120	104	7	14	370.2	19.25
2412	30	11	132	16	16	2077	37.2719	-23.9046	24.2738	-32.9479	10.5641	120	104	7	14	291.4	33.9167
2413	30	11	72	20	13.7	2247	37.2719	-23.9046	24.2738	-32.9479	10.5641	120	104	7	14	292.3	33.9167
2414	30	11	117	22	11.3	2081	36.195	-23.5393	23.0574	-32.7693	10.7191	106	106	8	13	275.1	35.6667
2415	30	11	119	22	13.4	2435	37.2719	-23.9046	24.2738	-32.9479	10.5641	120	104	7	14	313.4	30.6667
2416	30	11	157	30	19.2	2046	37.2719	-23.9046	24.2738	-32.9479	10.5641	120	104	7	14	283.5	33.9167
2417	30	11	137	30	20.4	3441	37.2719	-23.9046	24.2738	-32.9479	10.5641	120	104	7	14	425.5	17.0833
2418	30	11	157	24	15.2	2183	36.195	-23.5393	23.0574	-32.7693	10.7191	106	106	8	13	283.5	35.6667
2419	30	11	115	18	13.4	2417	37.2719	-23.9046	24.2738	-32.9479	10.5641	120	104	7	14	329.5	30.6667
2420	30	11	162	30	17.2	2012	36.195	-23.5393	23.0574	-32.7693	10.7191	106	106	8	13	292	35.6667
2421	30	11	112	22	19	1985	37.2719	-23.9046	24.2738	-32.9479	10.5641	120	104	7	14	283.5	33.9167
2422	30	11	52	16	8.5	2166	37.2719	-23.9046	24.2738	-32.9479	10.5641	120	104	7	14	292.3	33.9167
2423	30	11	117	22	18.5	2258	37.2719	-23.9046	24.2738	-32.9479	10.5641	120	104	7	14	308.3	33.9167
2424	30	11	132	26	15	3404	37.2719	-23.9046	24.2738	-32.9479	10.5641	120	104	7	14	425.5	19.25
2425	30	11	112	18	16	2112	36.195	-23.5393	23.0574	-32.7693	10.7191	106	106	8	13	275.1	35.6667
2426	30	11	97	22	15.6	1976	36.195	-23.5393	23.0574	-32.7693	10.7191	106	106	8	13	275.1	35.6667
2427	30	11	132	24	18.4	2126	37.2719	-23.9046	24.2738	-32.9479	10.5641	120	104	7	14	291.4	33.9167
2428	30	11	107	22	14.4	2529	36.195	-23.5393	23.0574	-32.7693	10.7191	106	106	8	13	299.7	29
2429	30	11	132	24	14.3	1994	36.195	-23.5393	23.0574	-32.7693	10.7191	106	106	8	13	275.1	35.6667
2430	30	11	137	24	16.3	2135	37.2719	-23.9046	24.2738	-32.9479	10.5641	120	104	7	14	283.5	33.9167
2431	30	11	117	26	18.5	2151	37.2719	-23.9046	24.2738	-32.9479	10.5641	120	104	7	14	308.3	33.9167
2432	30	11	113	20	12.4	2485	37.2719	-23.9046	24.2738	-32.9479	10.5641	120	104	7	14	322.2	30.6667
2433	30	11	137	28	19.4	3331	37.2719	-23.9046	24.2738	-32.9479	10.5641	120	104	7	14	413.9	19.25
2434	30	11	117	24	15.5	2209	36.195	-23.5393	23.0574	-32.7693	10.7191	106	106	8	13	278.4	35.6667
2435	30	11	117	20	13.4	2459	37.2719	-23.9046	24.2738	-32.9479	10.5641	120	104	7	14	329.5	30.6667
2436	30	11	122	22	13.4	1952	36.195	-23.5393	23.0574	-32.7693	10.7191	106	106	8	13	278.4	35.6667
2437	30	11	127	22	12.2	2244	36.195	-23.5393	23.0574	-32.7693	10.7191	106	106	8	13	285.3	35.6667
2438	30	11	132	24	18.4	2360	37.2719	-23.9046	24.2738	-32.9479	10.5641	120	104	7	14	320.8	33.9167
2439	30	11	137	28	20.4	2467	37.2719	-23.9046	24.2738	-32.9479	10.5641	120	104	7	14	305.5	33.9167
2440	30	11	122	24	19	2031	37.2719	-23.9046	24.2738	-32.9479	10.5641	120	104	7	14	291.4	33.9167
2441	30	11	112	22	14	2275	37.2719	-23.9046	24.2738	-32.9479	10.5641	120	104	7	14	308.3	33.9167
2442	30	11	117	20	18.5	2514	37.2719	-23.9046	24.2738	-32.9479	10.5641	120	104	7	14	307.5	29
2443	30	11	132	24	15	3428	37.2719	-23.9046	24.2738	-32.9479	10.5641	120	104	7	14	414.8	17.0833
2444	30	11	122	26	17	2203	36.195	-23.5393	23.0574	-32.7693	10.7191	106	106	8	13	285.3	35.6667
2445	30	11	107	18	10.3	2643	37.2719	-23.9046	24.2738	-32.9479	10.5641	120	104	7	14	322.2	30.6667
2446	30	11	137	28	20.4	3431	37.2719	-23.9046	24.2738	-32.9479	10.5641	120	104	7	14	414.4	17.0833
2447	30	11	152	22	16	2527	37.2719	-23.9046	24.2738	-32.9479	10.5641	120	104	7	14	325.5	33.9167
2448	30	11	162	28	17.2	2050	36.195	-23.5393	23.0574	-32.7693	10.7191	106	106	8	13	295.8	35.6667
2449	30	11	117	20	12.4	2600	37.2719	-23.9046	24.2738	-32.9479	10.5641	120	104	7	14	330.5	30.6667
2450	30	11	127	22	14.3	2246	36.195	-23.5393	23.0574	-32.7693	10.7191	106	106	8	13	295.8	35.6667
2451	30	11	142	22	17.3	2457	37.2719	-23.9046	24.2738	-32.9479	10.5641	120	104	7	14	316.5	33.9167
2452	30	11	112	20	13.4	2524	37.2719	-23.9046	24.2738	-32.9479	10.5641	120	104	7	14	330.5	30.6667
2453	30	11	137	26	18.4	3361	37.2719	-23.9046	24.2738	-32.9479	10.5641	120	104	7	14	421	17.0833
2454	30	11	67	14	9.5	2110	37.2719	-23.9046	24.2738	-32.9479	10.5641	120	104	7	14	291.4	33.9167
2455	30	11	87	18	15.6	2416	37.2719	-23.9046	24.2738	-32.9479	10.5641	120	104	7	14	294.6	29
2456	30	11	172	14	14	2445	37.2719	-23.9046	24.2738	-32.9479	10.5641	120	104	7	14	316.5	33.9167
2457	30	11	102	20	17.7	2412	37.2719	-23.9046	24.2738	-32.9479	10.5641	120	104	7	14	294.6	29
2458	30	11	57	14	8.5	2224	37.2719	-23.9046	24.2738	-32.9479	10.5641	120	104	7	14	291.4	33.9167
2459	30	11	112	16	16	2191	37.2719	-23.9046	24.2738	-32.9479	10.5641	120	104	7	14	291.4	33.9167
2460	30	11	102	18	14.6	2123	37.2719	-23.9046	24.2738	-32.9479	10.5641	120	104	7	14	291.4	33.9167
2461	30	11	157	24	16.2	2118	36.195	-23.5393	23.0574	-32.7693	10.7191	106	106	8	13	301.9	35.6667
2462	30	11	134	26	17.3	2553	37.2719	-23.9046	24.2738	-32.9479	10.5641	120	104	7	14	294.6	29
2463	30	11	147	32	21.4	2063	37.2719	-23.9046	24.2738	-32.9479	10.5641	120	104	7	14	302.7	33.9167
2464	30	11	102	20	15.6	2346	36.195	-23.5393	23.0574	-32.7693	10.7191	106	106	8	13	294.6	29
2465	30	11	107	20	14.4	2291	37.2719	-23.9046	24.2738	-32.9479	10.5641	120	104	7	14	308.3	33.9167
2466	30	11	132	24	18.4	2657	37.2719	-23.9046	24.2738	-32.9479	10.5641	120	104	7	14	325.1	33.9167
2467	30	11	132	16	15	2626	37.2719	-23.9046	24.2738	-32.9479	10.5641	120	104	7	14	320.5	33.9167
2468	30	11	132	22	17	2080	36.195	-23.5393	23.0574	-32.7693	10.7191	106	106	8	13	278.1	35.6667
2469	30	11	117	22	13.4	1982	36.195	-23.5393	23.0574	-32.7693	10.7191	106	106	8	13	278.1	35.6667
2470	30	11	122	22	16.5	2321	37.2719	-23.9046	24.2738	-32.9479	10.5641	120	104	7	14	309.2	33.9167
2471	30	11	122	28	18.5	2507	37.2719	-23.9046	24.2738	-32.9479	10.5641	120	104	7	14	297	29
2472	30	11	87	14	9.4	2371	37.2719	-23.9046	24.2738	-32.9479	10.5641	120	104	7	14	307.2	33.9167
2473	30	11	92	20	13.5	2232	36.195	-23.5393	23.0574	-32.7693	10.7191	106	106	8	13	293.4	35.6667
2474	30	11	132	26	18.4	2510	37.2719	-23.9046	24.2738	-32.9479	10.5641	120	104	7	14	325.1	33.9167
2475	30	11	147	22	14.3	2644	37.2719	-23.9046	24.2738	-32.9479	10.5641	120	104	7	14	329.4	24.25
2476	30	11	132	26	18.4	2659	37.2719	-23.9046	24.2738	-32.9479	10.5641	120	104	7	14	325.1	33.9167
2477	30	11	147	24	19.4	2422	37.2719	-23.9046	24.2738	-32.9479	10.5641	120	104	7	14	320.5	24.25
2478	30	11	67	16	10.5	2181	36.195	-23.5393	23.0574	-32.7693	10.7191	106	106	8	13	293.4	35.6667
2479	30	11	102	22	14.6	2331	36.195	-23.5393	23.0574	-32.7693	10.7191	106	106	8	13	293.4	35.6667
2480	30	11	127	26	20.4	2440	37.2719	-23.9046	24.2738	-32.9479	10.5641	120	104	7	14	320.5	33.9167
2481	30	11	137	30	19.4	2449	37.2719	-23.9046	24.2738	-32.9479	10.5641	120	104	7	14	309.2	33.9167
2482	30	11	120	24	17.5	2191	37.2719	-23.9046	24.2738	-32.9479	10.5641	120	104	7	14	292.1	33.9167
2483	30	11	117	22	13.4	2148	36.195	-23.5393	23.0574	-32.7693	10.7191	106	106	8	13	293.4	35.6667
2484	30	11	117	24	16.5	2231	37.2719	-23.9046	24.2738	-32.9479	10.5641	120	104	7	14	302.7	33.9167
2485	30	11	102	20	14.6	2620	37.2719	-23.9046	24.2738	-32.9479	10.5641	120	104	7	14	321.6	33.9167
2486	30	11	102	18	11.4	2341	37.2719	-23.9046	24.2738	-32.9479	10.5641	120	104	7	14	305.7	33.9167
2487	30	11	127	20	13.3	2179	36.195	-23.5393	23.0574	-32.7693	10.7191	106	106	8	13	293.4	35.6667
2488	30	11	157	28	18.2	2456	37.2719	-23.9046	24.2738	-32.9479	10.5641	120	104	7	14	320.5	24.25
2489	30	11	117	20	14.4	2445	36.195	-23.5393	23.0574	-32.7693	10.7191	106	106	8	13	298.1	35.6667
2490	30	11	137	22	14.3	2002	36.195	-23.5393	23.0574	-32.7693	10.7191	106	106	8	13	278.1	35.6667
2491	30	11	147	34	21.4	2378	37.2719	-23.9046	24.2738	-32.9479	10.5641	120	104	7	14	287.2	29
2492	30	11	152	28	22.4	2258	36.195	-23.5393	23.0574	-32.7693	10.7191	106	106	8	13	301.9	35.6667
2493	30	11	147	28	20.4	2351	36.195	-23.5393	23.0574	-32.7693	10.7191	106	106	8	13	302.9	35.6667
2494	30	11	147	24	18.4	2110	37.2719	-23.9046	24.2738	-32.9479	10.5641	120	104	7	14	299.4	33.9167
2495	30	11	142	24	14.3	2289	36.195	-23.5393	23.0574	-32.7693	10.7191	106	106	8	13	305.2	35.6667
2496	30	11	127	28	19.4	2169	37.2719	-23.9046	24.2738	-32.9479	10.5641	120	104	7	14	305.7	33.9167
2497	30	11	147	22	13.3	2221	36.195	-23.5393	23.0574	-32.7693	10.7191	106	106	8	13	293.4	35.6667
2498	30	11	137	24	16.3	2287	36.195	-23.5393	23.0574	-32.7693	10.7191	106	106	8	13	302.9	29.5
2499	30	11	167	32	21.2	2338	37.2719	-23.9046	24.2738	-32.9479	10.5641	120	104	7	14	297.8	33.9167
2500	30	11	97	18	13.5	2360	37.2719	-23.9046	24.2738	-32.9479	10.5641	120	104	7	14	305.2	33.9167
2501	30	11	97	20	14.6	2447	37.2719	-23.9046	24.2738	-32.9479	10.5641	120	104	7	14	330.3	33.9167
2502	30	11	132	24	14.3	2393	36.195	-23.5393	23.0574	-32.7693	10.7191	106	106	8	13	305.2	35.6667
2503	30	11	152	30	16.3	2510	36.195	-23.5393	23.0574	-32.7693	10.7191	106	106	8	13	305.2	35.6667
2504	30	11	157	24	19.2	2106	37.2719	-23.9046	24.2738	-32.9479	10.5641	120	104	7	14	300.3	33.9167
2505	30	11	177	30	20.2	2216	37.2719	-23.9046	24.2738	-32.9479	10.5641	120	104	7	14	297.8	33.9167
2506	30	11	82	18	12.6	2366	36.195	-23.5393	23.0574	-32.7693	10.7191	106	106	8	13	302.9	29.5
2507	30	11	152	22	12.2	2337	36.195	-23.5393	23.0574	-32.7693	10.7191	106	106	8	13	303.8	35.6667
2508	30	11	122	24	17.5	2437	37.2719	-23.9046	24.2738	-32.9479	10.5641	120	104	7	14	307.9	29
2509	30	11	117	22	16.5	2490	37.2719	-23.9046	24.2738	-32.9479	10.5641	120	104	7	14	310	33.9167
2510	30	11	137	26	15.3	2034	36.195	-23.5393	23.0574	-32.7693	10.7191	106	106	8	13	287.5	35.6667
2511	30	11	152	28	17	2467	37.2719	-23.9046	24.2738	-32.9479	10.5641	120	104	7	14	307.3	24.25
2512	30	11	147	22	12.2	2481	36.195	-23.5393	23.0574	-32.7693	10.7191	106	106	8	13	302.9	35.6667
2513	30	11	142	22	15.3	2026	36.195	-23.5393	23.0574	-32.7693	10.7191	106	106	8	13	287.5	35.6667
2514	30	11	142	22	15.3	2133	36.195	-23.5393	23.0574	-32.7693	10.7191	106	106	8	13	287.5	35.6667
2515	30	11	177	32	21.2	2359	37.2719	-23.9046	24.2738	-32.9479	10.5641	120	104	7	14	307.3	24.25
2516	30	11	72	16	11.6	2186	36.195	-23.5393	23.0574	-32.7693	10.7191	106	106	8	13	287.5	35.6667
2517	30	11	90	16	10.4	2192	37.2719	-23.9046	24.2738	-32.9479	10.5641	120	104	7	14	300.3	33.9167
2518	30	11	137	24	15.3	2126	36.195	-23.5393	23.0574	-32.7693	10.7191	106	106	8	13	287.5	35.6667
2519	30	11	117	26	17.5	2093	37.2719	-23.9046	24.2738	-32.9479	10.5641	120	104	7	14	301.3	33.9167
2520	30	11	127	28	19.4	2396	37.2719	-23.9046	24.2738	-32.9479	10.5641	120	104	7	14	279.7	29
2521	30	11	92	20	14.6	2383	36.195	-23.5393	23.0574	-32.7693	10.7191	106	106	8	13	303.8	35.6667
2522	30	11	172	26	18.2	2590	37.2719	-23.9046	24.2738	-32.9479	10.5641	120	104	7	14	325.6	24.25
2523	30	11	97	18	14.6	2405	37.2719	-23.9046	24.2738	-32.9479	10.5641	120	104	7	14	315.7	33.9167
2524	30	11	147	22	13.3	2516	36.195	-23.5393	23.0574	-32.7693	10.7191	106	106	8	13	302.9	29.5
2525	30	11	122	24	13	2575	37.2719	-23.9046	24.2738	-32.9479	10.5641	120	104	7	14	345.5	33.9167
2526	30	11	117	24	14.4	2492	36.195	-23.5393	23.0574	-32.7693	10.7191	106	106	8	13	303.8	35.6667
2527	30	11	132	24	14.3	2413	36.195	-23.5393	23.0574	-32.7693	10.7191	106	106	8	13	303.8	35.6667
2528	30	11	137	22	12.2	2358	36.195	-23.5393	23.0574	-32.7693	10.7191	106	106	8	13	312.8	29.5
2529	30	11	97	18	13.5	2494	37.2719	-23.9046	24.2738	-32.9479	10.5641	120	104	7	14	318.7	33.9167
2530	30	11	147	24	17.3	2388	36.195	-23.5393	23.0574	-32.7693	10.7191	106	106	8	13	305.1	29.5
2531	30	11	97	20	13.5	2178	36.195	-23.5393	23.0574	-32.7693	10.7191	106	106	8	13	287.5	35.6667
2532	30	11	107	16	8.2	2462	37.2719	-23.9046	24.2738	-32.9479	10.5641	120	104	7	14	309.7	33.9167
2533	30	11	122	24	15	2356	36.195	-23.5393	23.0574	-32.7693	10.7191	106	106	8	13	287.5	35.6667
2534	30	11	97	20	14.6	2563	37.2719	-23.9046	24.2738	-32.9479	10.5641	120	104	7	14	327.3	33.9167
2535	30	11	97	20	13.5	2386	37.2719	-23.9046	24.2738	-32.9479	10.5641	120	104	7	14	315.7	33.9167
2536	30	11	112	22	16	2623	37.2719	-23.9046	24.2738	-32.9479	10.5641	120	104	7	14	337.8	33.9167
2537	30	11	162	26	19	2285	37.2719	-23.9046	24.2738	-32.9479	10.5641	120	104	7	14	296.6	24.25
2538	30	11	137	22	12	2524	36.195	-23.5393	23.0574	-32.7693	10.7191	106	106	8	13	317.7	29.5
2539	30	11	107	20	12.4	2483	37.2719	-23.9046	24.2738	-32.9479	10.5641	120	104	7	14	323.3	33.9167
2540	30	11	142	20	15.3	2629	36.195	-23.5393	23.0574	-32.7693	10.7191	106	106	8	13	311.4	35.6667
2541	30	11	147	34	23.5	2383	37.2719	-23.9046	24.2738	-32.9479	10.5641	120	104	7	14	301.4	29
2542	30	11	152	28	16.3	2082	36.195	-23.5393	23.0574	-32.7693	10.7191	106	106	8	13	286	35.6667
2543	30	11	157	32	19.2	2195	36.195	-23.5393	23.0574	-32.7693	10.7191	106	106	8	13	295.4	35.6667
2544	30	11	117	22	14.4	2533	37.2719	-23.9046	24.2738	-32.9479	10.5641	120	104	7	14	318.7	33.9167
2545	30	11	147	24	15.3	2423	36.195	-23.5393	23.0574	-32.7693	10.7191	106	106	8	13	305.1	29.5
2546	30	11	147	24	15.3	2052	36.195	-23.5393	23.0574	-32.7693	10.7191	106	106	8	13	286	35.6667
2547	30	11	112	20	13.4	2287	37.2719	-23.9046	24.2738	-32.9479	10.5641	120	104	7	14	296.6	25.6667
2548	30	11	147	24	14.3	2297	36.195	-23.5393	23.0574	-32.7693	10.7191	106	106	8	13	305.1	29.5
2549	30	11	97	20	14.6	2360	36.195	-23.5393	23.0574	-32.7693	10.7191	106	106	8	13	295.4	35.6667
2550	30	11	97	18	12.5	2647	37.2719	-23.9046	24.2738	-32.9479	10.5641	120	104	7	14	337.8	33.9167
2551	30	11	107	20	12.4	2565	37.2719	-23.9046	24.2738	-32.9479	10.5641	120	104	7	14	318	33.9167
2552	30	11	149	24	19.4	2415	36.195	-23.5393	23.0574	-32.7693	10.7191	106	106	8	13	303.1	29.5
2553	30	11	137	22	12.2	2485	36.195	-23.5393	23.0574	-32.7693	10.7191	106	106	8	13	312.8	29.5
2554	30	11	87	18	13.5	2223	36.195	-23.5393	23.0574	-32.7693	10.7191	106	106	8	13	286	35.6667
2555	30	11	137	28	19	2206	36.195	-23.5393	23.0574	-32.7693	10.7191	106	106	8	13	279.7	29
2556	30	11	147	24	16.3	2293	37.2719	-23.9046	24.2738	-32.9479	10.5641	120	104	7	14	296.6	25.9167
2557	30	11	97	20	14.6	2349	36.195	-23.5393	23.0574	-32.7693	10.7191	106	106	8	13	295.4	35.6667
2558	30	11	147	34	21.4	2555	37.2719	-23.9046	24.2738	-32.9479	10.5641	120	104	7	14	319.7	29
2559	30	11	52	12	6.4	2224	37.2719	-23.9046	24.2738	-32.9479	10.5641	120	104	7	14	296.6	25.9167
2560	30	11	47	12	7.5	2214	37.2719	-23.9046	24.2738	-32.9479	10.5641	120	104	7	14	305	25.9167
2561	30	11	152	24	17.3	2161	37.2719	-23.9046	24.2738	-32.9479	10.5641	120	104	7	14	305	24.25
2562	30	11	92	20	15.6	2431	36.195	-23.5393	23.0574	-32.7693	10.7191	106	106	8	13	295.4	35.6667
2563	30	11	32	6	5	2447	36.195	-23.5393	23.0574	-32.7693	10.7191	106	106	8	13	295.4	35.6667
2564	30	11	57	12	8.5	2303	37.2719	-23.9046	24.2738	-32.9479	10.5641	120	104	7	14	327.6	25.6667
2565	30	11	97	20	12.5	2437	37.2719	-23.9046	24.2738	-32.9479	10.5641	120	104	7	14	315.7	25.6667
2566	30	11	147	24	16.3	2495	36.195	-23.5393	23.0574	-32.7693	10.7191	106	106	8	13	305.1	29.5
2567	30	11	108	18	12.4	2320	37.2719	-23.9046	24.2738	-32.9479	10.5641	120	104	7	14	327.6	25.6667
2568	30	11	132	22	14	2480	36.195	-23.5393	23.0574	-32.7693	10.7191	106	106	8	13	326.3	35.6667
2569	30	11	137	22	11.2	2611	36.195	-23.5393	23.0574	-32.7693	10.7191	106	106	8	13	317.7	30.25
2570	30	11	147	24	13.3	2355	36.195	-23.5393	23.0574	-32.7693	10.7191	106	106	8	13	305.1	30.25
2571	30	11	117	22	14.4	2422	36.195	-23.5393	23.0574	-32.7693	10.7191	106	106	8	13	311.4	33.5
2572	30	11	142	24	17	2495	36.195	-23.5393	23.0574	-32.7693	10.7191	106	106	8	13	303.1	30.25
2573	30	11	137	30	19.4	2373	37.2719	-23.9046	24.2738	-32.9479	10.5641	120	104	7	14	279.7	30
2574	30	11	117	22	14.4	2403	37.2719	-23.9046	24.2738	-32.9479	10.5641	120	104	7	14	332.4	25.9167
2575	30	11	142	22	15	2477	36.195	-23.5393	23.0574	-32.7693	10.7191	106	106	8	13	309.3	30.25
2576	30	11	87	18	13.5	2432	37.2719	-23.9046	24.2738	-32.9479	10.5641	120	104	7	14	324.2	25.6667
2577	30	11	122	22	15	2566	37.2719	-23.9046	24.2738	-32.9479	10.5641	120	104	7	14	332.4	25.6667
2578	30	11	122	22	15.5	2454	37.2719	-23.9046	24.2738	-32.9479	10.5641	120	104	7	14	324.2	25.6667
2579	30	11	157	36	24.2	2247	36.195	-23.5393	23.0574	-32.7693	10.7191	106	106	8	13	279.9	30
2580	30	11	152	28	19.4	2198	37.2719	-23.9046	24.2738	-32.9479	10.5641	120	104	7	14	310.7	25.9167
2581	30	11	157	28	13.1	2592	36.195	-23.5393	23.0574	-32.7693	10.7191	106	106	8	13	335.3	33.5
2582	30	11	37	10	8.6	2470	37.2719	-23.9046	24.2738	-32.9479	10.5641	120	104	7	14	327.6	25.6667
2583	30	11	92	18	11.4	2506	37.2719	-23.9046	24.2738	-32.9479	10.5641	120	104	7	14	327.6	25.6667
2584	30	11	87	16	10.4	2543	36.195	-23.5393	23.0574	-32.7693	10.7191	106	106	8	13	322.8	33.5
2585	30	11	112	20	15	2595	37.2719	-23.9046	24.2738	-32.9479	10.5641	120	104	7	14	343.4	25.6667
2586	30	11	142	22	14.3	2553	36.195	-23.5393	23.0574	-32.7693	10.7191	106	106	8	13	314.8	30.25
2587	30	11	137	24	17.3	2281	36.195	-23.5393	23.0574	-32.7693	10.7191	106	106	8	13	286.8	33.5
2588	30	11	132	26	15	2697	37.2719	-23.9046	24.2738	-32.9479	10.5641	120	104	7	14	353	25.6667
2589	30	11	157	24	18.2	2557	36.195	-23.5393	23.0574	-32.7693	10.7191	106	106	8	13	326.8	30.25
2590	30	11	177	28	12.1	2588	36.195	-23.5393	23.0574	-32.7693	10.7191	106	106	8	13	322.8	33.5
2591	30	11	127	22	14.3	2583	37.2719	-23.9046	24.2738	-32.9479	10.5641	120	104	7	14	330.8	25.6667
2592	30	11	132	14	14	2634	37.2719	-23.9046	24.2738	-32.9479	10.5641	120	104	7	14	331.9	25.6667
2593	30	11	97	18	11.4	2559	37.2719	-23.9046	24.2738	-32.9479	10.5641	120	104	7	14	327.6	25.6667
2594	30	11	152	22	16.3	2186	36.195	-23.5393	23.0574	-32.7693	10.7191	106	106	8	13	286.8	33.5
2595	30	11	152	16	16	2340	37.2719	-23.9046	24.2738	-32.9479	10.5641	120	104	7	14	318.1	25.9167
2596	30	11	157	24	13.1	2508	36.195	-23.5393	23.0574	-32.7693	10.7191	106	106	8	13	309.3	30.25
2597	30	11	152	34	23.5	2452	37.2719	-23.9046	24.2738	-32.9479	10.5641	120	104	7	14	302.2	30
2598	30	11	142	22	14.3	2654	36.195	-23.5393	23.0574	-32.7693	10.7191	106	106	8	13	314.8	30.25
2599	30	11	142	34	20.4	2340	37.2719	-23.9046	24.2738	-32.9479	10.5641	120	104	7	14	279.9	30
2600	30	11	177	30	22.2	2272	37.2719	-23.9046	24.2738	-32.9479	10.5641	120	104	7	14	334.6	25.9167
2601	30	11	132	24	15	2273	37.2719	-23.9046	24.2738	-32.9479	10.5641	120	104	7	14	318.1	25.9167
2602	30	11	147	24	16.3	2562	36.195	-23.5393	23.0574	-32.7693	10.7191	106	106	8	13	304.4	29.4167
2603	30	11	152	20	13.3	2564	36.195	-23.5393	23.0574	-32.7693	10.7191	106	106	8	13	319.8	30.25
2604	30	11	162	34	23.2	2198	36.195	-23.5393	23.0574	-32.7693	10.7191	106	106	8	13	279.9	30
2605	30	11	147	24	14.3	2589	36.195	-23.5393	23.0574	-32.7693	10.7191	106	106	8	13	309.3	30.25
2606	30	11	137	32	20.4	2644	37.2719	-23.9046	24.2738	-32.9479	10.5641	120	104	7	14	333.7	30
2607	30	11	67	16	21	2356	37.2719	-23.9046	24.2738	-32.9479	10.5641	120	104	7	14	279.9	30
2608	30	11	147	22	11.2	2464	36.195	-23.5393	23.0574	-32.7693	10.7191	106	106	8	13	304.6	33.5
2609	30	11	147	34	20.4	2195	36.195	-23.5393	23.0574	-32.7693	10.7191	106	106	8	13	281	30
2610	30	11	147	24	13.3	2487	36.195	-23.5393	23.0574	-32.7693	10.7191	106	106	8	13	322.3	29.4167
2611	30	11	147	18	9	2474	37.2719	-23.9046	24.2738	-32.9479	10.5641	120	104	7	14	309.1	25.9167
2612	30	11	112	22	16	2046	36.195	-23.5393	23.0574	-32.7693	10.7191	106	106	8	13	284.7	33.5
2613	30	11	137	24	12.2	2577	36.195	-23.5393	23.0574	-32.7693	10.7191	106	106	8	13	332.3	30.25
2614	30	11	137	32	20.4	2550	37.2719	-23.9046	24.2738	-32.9479	10.5641	120	104	7	14	309	30
2615	30	11	147	22	14.3	2657	36.195	-23.5393	23.0574	-32.7693	10.7191	106	106	8	13	328.3	30.25
2616	30	11	172	32	22.2	2259	37.2719	-23.9046	24.2738	-32.9479	10.5641	120	104	7	14	334.6	25.9167
2617	30	11	122	20	15	2730	37.2719	-23.9046	24.2738	-32.9479	10.5641	120	104	7	14	331.1	24.8333
2618	30	11	122	20	16	2589	37.2719	-23.9046	24.2738	-32.9479	10.5641	120	104	7	14	322.1	24.8333
2619	30	11	152	22	16.3	2199	36.195	-23.5393	23.0574	-32.7693	10.7191	106	106	8	13	304.6	33.5
2620	30	11	147	32	23.5	2273	37.2719	-23.9046	24.2738	-32.9479	10.5641	120	104	7	14	299.2	30
2621	30	11	157	34	25.3	2187	36.195	-23.5393	23.0574	-32.7693	10.7191	106	106	8	13	281	30
2622	30	11	137	32	20.4	2545	37.2719	-23.9046	24.2738	-32.9479	10.5641	120	104	7	14	309	30
2623	30	11	147	24	14	2658	36.195	-23.5393	23.0574	-32.7693	10.7191	106	106	8	13	328.3	30.25
2624	30	11	132	26	11	2588	37.2719	-23.9046	24.2738	-32.9479	10.5641	120	104	7	14	334.6	25.9167
2625	30	11	147	24	15.3	2578	36.195	-23.5393	23.0574	-32.7693	10.7191	106	106	8	13	308.1	29.4167
2626	30	11	142	24	14	2576	36.195	-23.5393	23.0574	-32.7693	10.7191	106	106	8	13	328.3	29.4167
2627	30	11	132	30	20.4	2547	37.2719	-23.9046	24.2738	-32.9479	10.5641	120	104	7	14	309	30
2628	30	11	152	16	10.2	2925	37.2719	-23.9046	24.2738	-32.9479	10.5641	120	104	7	14	332.4	21
2629	30	11	157	32	22.2	2456	37.2719	-23.9046	24.2738	-32.9479	10.5641	120	104	7	14	299.2	30
2630	30	11	147	32	21.4	2423	37.2719	-23.9046	24.2738	-32.9479	10.5641	120	104	7	14	299.2	30
2631	30	11	152	24	18.4	2232	36.195	-23.5393	23.0574	-32.7693	10.7191	106	106	8	13	304.6	33.5
2632	30	11	152	16	10.2	2369	37.2719	-23.9046	24.2738	-32.9479	10.5641	120	104	7	14	323.8	25.9167
2633	30	11	182	30	20.2	2249	37.2719	-23.9046	24.2738	-32.9479	10.5641	120	104	7	14	323.8	25.9167
2634	30	11	147	24	14.3	2590	36.195	-23.5393	23.0574	-32.7693	10.7191	106	106	8	13	308.1	29.4167
2635	30	11	127	22	17.3	2477	37.2719	-23.9046	24.2738	-32.9479	10.5641	120	104	7	14	322.1	24.8333
2636	30	11	167	36	21.2	2539	37.2719	-23.9046	24.2738	-32.9479	10.5641	120	104	7	14	316.7	24.8333
2637	30	11	167	30	17.2	2235	36.195	-23.5393	23.0574	-32.7693	10.7191	106	106	8	13	290.9	33.5
2638	30	11	157	30	18.2	2638	37.2719	-23.9046	24.2738	-32.9479	10.5641	120	104	7	14	358.9	25.9167
2639	30	11	152	24	12	2470	36.195	-23.5393	23.0574	-32.7693	10.7191	106	106	8	13	299.5	33.5
2640	30	11	172	28	19.2	2275	37.2719	-23.9046	24.2738	-32.9479	10.5641	120	104	7	14	323.8	25.9167
2641	30	11	177	32	18.2	2226	36.195	-23.5393	23.0574	-32.7693	10.7191	106	106	8	13	290.9	33.5
2642	30	11	127	24	19.4	2417	37.2719	-23.9046	24.2738	-32.9479	10.5641	120	104	7	14	301.3	30
2643	30	11	167	30	14.1	2615	36.195	-23.5393	23.0574	-32.7693	10.7191	106	106	8	13	324.1	29.4167
2644	30	11	157	24	17.2	2933	37.2719	-23.9046	24.2738	-32.9479	10.5641	120	104	7	14	355	21
2645	30	11	167	22	11.1	2361	37.2719	-23.9046	24.2738	-32.9479	10.5641	120	104	7	14	312.9	25.9167
2646	30	11	152	24	18.4	2224	36.195	-23.5393	23.0574	-32.7693	10.7191	106	106	8	13	290.9	33.5
2647	30	11	142	34	20.4	2442	37.2719	-23.9046	24.2738	-32.9479	10.5641	120	104	7	14	305.7	24.8333
2648	30	11	137	28	21.4	2563	37.2719	-23.9046	24.2738	-32.9479	10.5641	120	104	7	14	325.7	24.8333
2649	30	11	77	16	12.6	2179	37.2719	-23.9046	24.2738	-32.9479	10.5641	120	104	7	14	290.1	30
2650	30	11	157	20	17.2	2152	36.195	-23.5393	23.0574	-32.7693	10.7191	106	106	8	13	279.6	30
2651	30	11	142	24	20.4	2320	37.2719	-23.9046	24.2738	-32.9479	10.5641	120	104	7	14	296.1	30
2652	30	11	122	16	14.4	2568	36.195	-23.5393	23.0574	-32.7693	10.7191	106	106	8	13	327	30.25
2653	30	11	122	20	19	2672	37.2719	-23.9046	24.2738	-32.9479	10.5641	120	104	7	14	334	24.8333
2654	30	11	157	32	20.2	2231	36.195	-23.5393	23.0574	-32.7693	10.7191	106	106	8	13	290.9	33.5
2655	30	11	137	22	22.4	2623	36.195	-23.5393	23.0574	-32.7693	10.7191	106	106	8	13	315.3	29.4167
2656	30	11	157	28	18.2	2772	37.2719	-23.9046	24.2738	-32.9479	10.5641	120	104	7	14	363.3	25.9167
2657	30	11	112	16	16	2280	37.2719	-23.9046	24.2738	-32.9479	10.5641	120	104	7	14	301.3	30
2658	30	11	122	22	13.4	2390	36.195	-23.5393	23.0574	-32.7693	10.7191	106	106	8	13	309.5	33.5
2659	30	11	157	22	15.2	2922	37.2719	-23.9046	24.2738	-32.9479	10.5641	120	104	7	14	334.1	21
2660	30	11	122	20	13.4	2533	36.195	-23.5393	23.0574	-32.7693	10.7191	106	106	8	13	327	33.5
2661	30	11	137	26	20.4	2289	37.2719	-23.9046	24.2738	-32.9479	10.5641	120	104	7	14	287.5	30
2662	30	11	162	28	18.2	2243	36.195	-23.5393	23.0574	-32.7693	10.7191	106	106	8	13	290.9	33.5
2663	30	11	127	20	15.3	2306	37.2719	-23.9046	24.2738	-32.9479	10.5641	120	104	7	14	316.3	25.9167
2664	30	11	152	18	16.3	2329	36.195	-23.5393	23.0574	-32.7693	10.7191	106	106	8	13	281.5	30
2665	30	11	117	20	22.7	2611	36.195	-23.5393	23.0574	-32.7693	10.7191	106	106	8	13	315.3	29.4167
2666	30	11	112	24	14	2069	36.195	-23.5393	23.0574	-32.7693	10.7191	106	106	8	13	284.9	33.5
2667	30	11	122	22	13.4	2357	36.195	-23.5393	23.0574	-32.7693	10.7191	106	106	8	13	305.8	33.5
2668	30	11	172	28	19.2	2197	36.195	-23.5393	23.0574	-32.7693	10.7191	106	106	8	13	284.9	33.5
2669	30	11	132	30	23.5	2487	37.2719	-23.9046	24.2738	-32.9479	10.5641	120	104	7	14	308.9	24.8333
2670	30	11	117	16	22.7	2574	36.195	-23.5393	23.0574	-32.7693	10.7191	106	106	8	13		29.4167
2671	30	11	132	22	17.3	2350	37.2719	-23.9046	24.2738	-32.9479	10.5641	120	104	7	14	316.3	25.9167
2672	30	11	147	22	15.3	2303	36.195	-23.5393	23.0574	-32.7693	10.7191	106	106	8	13	291.3	33.5
2673	30	11	122	22	14.4	2452	36.195	-23.5393	23.0574	-32.7693	10.7191	106	106	8	13	305.8	33.5
2674	30	11	147	18	13.3	2477	37.2719	-23.9046	24.2738	-32.9479	10.5641	120	104	7	14	316.3	21
2675	30	11	112	20	16	2706	36.195	-23.5393	23.0574	-32.7693	10.7191	106	106	8	13	333.9	29.4167
2676	30	11	147	34	23.5	2307	37.2719	-23.9046	24.2738	-32.9479	10.5641	120	104	7	14	298.8	24.8333
2677	30	11	147	30	20.4	2390	37.2719	-23.9046	24.2738	-32.9479	10.5641	120	104	7	14	340.8	25.9167
2678	30	11	114	22	15.5	2547	36.195	-23.5393	23.0574	-32.7693	10.7191	106	106	8	13	308.6	33.5
2679	30	11	57	14	9.5	2309	37.2719	-23.9046	24.2738	-32.9479	10.5641	120	104	7	14	290.1	30
2680	30	11	122	22	15.5	2520	36.195	-23.5393	23.0574	-32.7693	10.7191	106	106	8	13	308.6	33.5
2681	30	11	132	24	14.3	2212	36.195	-23.5393	23.0574	-32.7693	10.7191	106	106	8	13	291.3	33.5
2682	30	11	82	18	10.5	2311	37.2719	-23.9046	24.2738	-32.9479	10.5641	120	104	7	14	291.2	30
2683	30	11	72	14	9.5	2289	37.2719	-23.9046	24.2738	-32.9479	10.5641	120	104	7	14	291.2	30
2684	30	11	147	32	22.4	2300	37.2719	-23.9046	24.2738	-32.9479	10.5641	120	104	7	14	298.8	24.8333
2685	30	11	132	16	16	2558	36.195	-23.5393	23.0574	-32.7693	10.7191	106	106	8	13	333.9	29.4167
2686	30	11	127	22	16.3	2284	36.195	-23.5393	23.0574	-32.7693	10.7191	106	106	8	13	281.5	30
2687	30	11	157	22	16.2	2929	37.2719	-23.9046	24.2738	-32.9479	10.5641	120	104	7	14	337.9	21
2688	30	11	137	22	16.3	2493	37.2719	-23.9046	24.2738	-32.9479	10.5641	120	104	7	14	347.9	14.25
2689	30	11	82	16	9.5	2337	37.2719	-23.9046	24.2738	-32.9479	10.5641	120	104	7	14	318.3	24.6667
2690	30	11	147	22	14.3	2227	36.195	-23.5393	23.0574	-32.7693	10.7191	106	106	8	13	284.9	33.5
2691	30	11	152	28	17.3	2360	36.195	-23.5393	23.0574	-32.7693	10.7191	106	106	8	13	281.5	30
2692	30	11	112	22	15	2722	36.195	-23.5393	23.0574	-32.7693	10.7191	106	106	8	13	333.9	29.4167
2693	30	11	122	22	15.5	2423	36.195	-23.5393	23.0574	-32.7693	10.7191	106	106	8	13	303.2	28.25
2694	30	11	122	22	15.5	2473	36.195	-23.5393	23.0574	-32.7693	10.7191	106	106	8	13	313.1	28.25
2695	30	11	167	24	15	2454	37.2719	-23.9046	24.2738	-32.9479	10.5641	120	104	7	14	315.4	20.6667
2696	30	11	157	24	17.2	2113	36.195	-23.5393	23.0574	-32.7693	10.7191	106	106	8	13	285	28.25
2697	30	11	120	22	14.4	2520	36.195	-23.5393	23.0574	-32.7693	10.7191	106	106	8	13	339.2	30.25
2698	30	11	157	30	19.2	2377	37.2719	-23.9046	24.2738	-32.9479	10.5641	120	104	7	14	315.4	20.6667
2699	30	11	77	18	11.6	2289	37.2719	-23.9046	24.2738	-32.9479	10.5641	120	104	7	14	312.9	24.6667
2700	30	11	112	26	14	3006	37.2719	-23.9046	24.2738	-32.9479	10.5641	120	104	7	14	337.9	20.6667
2701	30	11	127	24	18.4	2264	37.2719	-23.9046	24.2738	-32.9479	10.5641	120	104	7	14	303.8	24.6667
2702	30	11	112	20	16.5	2434	37.2719	-23.9046	24.2738	-32.9479	10.5641	120	104	7	14	303.8	24.6667
2703	30	11	142	24	17.3	2368	36.195	-23.5393	23.0574	-32.7693	10.7191	106	106	8	13	286.5	26.75
2704	30	11	157	30	17.2	2240	36.195	-23.5393	23.0574	-32.7693	10.7191	106	106	8	13	303.2	28.25
2705	30	11	152	24	15.3	2449	37.2719	-23.9046	24.2738	-32.9479	10.5641	120	104	7	14	315.4	20.6667
2706	30	11	152	18	14	2843	37.2719	-23.9046	24.2738	-32.9479	10.5641	120	104	7	14	354.8	15.5833
2707	30	11	122	16	15	2652	37.2719	-23.9046	24.2738	-32.9479	10.5641	120	104	7	14	286.5	26.75
2708	30	11	137	28	18.4	2687	37.2719	-23.9046	24.2738	-32.9479	10.5641	120	104	7	14	331.2	24.6667
2709	30	11	127	20	16.3	2317	36.195	-23.5393	23.0574	-32.7693	10.7191	106	106	8	13	290	26.75
2710	30	11	137	30	19.4	2909	37.2719	-23.9046	24.2738	-32.9479	10.5641	120	104	7	14	354.8	15.5833
2711	30	11	142	28	18	2218	36.195	-23.5393	23.0574	-32.7693	10.7191	106	106	8	13	303.2	28.25
2712	30	11	132	26	17	2798	37.2719	-23.9046	24.2738	-32.9479	10.5641	120	104	7	14	330.2	20.6667
2713	30	11	132	26	14	2961	37.2719	-23.9046	24.2738	-32.9479	10.5641	120	104	7	14	330.2	20.6667
2714	30	11	107	18	12.4	2337	36.195	-23.5393	23.0574	-32.7693	10.7191	106	106	8	13	314.9	28.25
2715	30	11	57	12	9.5	2323	37.2719	-23.9046	24.2738	-32.9479	10.5641	120	104	7	14	329.9	24.6667
2716	30	11	147	20	13.3	2160	36.195	-23.5393	23.0574	-32.7693	10.7191	106	106	8	13	305.8	28.25
2717	30	11	137	22	18.4	2306	37.2719	-23.9046	24.2738	-32.9479	10.5641	120	104	7	14	314.1	24.6667
2718	30	11	97	20	12.5	2308	37.2719	-23.9046	24.2738	-32.9479	10.5641	120	104	7	14	329.9	24.6667
2719	30	11	122	22	16.5	2469	36.195	-23.5393	23.0574	-32.7693	10.7191	106	106	8	13	314.9	28.25
2720	30	11	152	24	15	3020	37.2719	-23.9046	24.2738	-32.9479	10.5641	120	104	7	14	368.4	15.5833
2721	30	11	137	24	17.3	3029	37.2719	-23.9046	24.2738	-32.9479	10.5641	120	104	7	14	336	15.5833
2722	30	11	152	20	17	2518	37.2719	-23.9046	24.2738	-32.9479	10.5641	120	104	7	14	314.1	24.6667
2723	30	11	137	20	15.3	2864	37.2719	-23.9046	24.2738	-32.9479	10.5641	120	104	7	14	336	24.6667
2724	30	11	137	26	18.4	2765	37.2719	-23.9046	24.2738	-32.9479	10.5641	120	104	7	14	368.4	15.5833
2725	30	11	137	26	19.4	2581	37.2719	-23.9046	24.2738	-32.9479	10.5641	120	104	7	14	309.3	26.75
2726	30	11	132	22	14	2861	37.2719	-23.9046	24.2738	-32.9479	10.5641	120	104	7	14	335.7	26.75
2727	30	11	152	26	16	2523	37.2719	-23.9046	24.2738	-32.9479	10.5641	120	104	7	14	314.1	24.6667
2728	30	11	112	26	14	2975	37.2719	-23.9046	24.2738	-32.9479	10.5641	120	104	7	14	357.9	20.6667
2729	30	11	137	24	16.3	2348	37.2719	-23.9046	24.2738	-32.9479	10.5641	120	104	7	14	307.4	24.6667
2730	30	11	157	20	14.1	2618	37.2719	-23.9046	24.2738	-32.9479	10.5641	120	104	7	14	337.8	20.6667
2731	30	11	132	16	15	2585	36.195	-23.5393	23.0574	-32.7693	10.7191	106	106	8	13	344.4	28.25
2732	30	11	137	26	17.3	2683	37.2719	-23.9046	24.2738	-32.9479	10.5641	120	104	7	14	307.4	15.5833
2733	30	11	87	18	10.4	2283	37.2719	-23.9046	24.2738	-32.9479	10.5641	120	104	7	14	319.4	24.6667
2734	30	11	122	18	18	2613	36.195	-23.5393	23.0574	-32.7693	10.7191	106	106	8	13	347.9	28.25
2735	30	11	137	28	19.4	2651	37.2719	-23.9046	24.2738	-32.9479	10.5641	120	104	7	14	305.5	26.75
2736	30	11	137	26	18.4	2391	36.195	-23.5393	23.0574	-32.7693	10.7191	106	106	8	13	337.8	26.75
2737	30	11	152	22	14	2447	37.2719	-23.9046	24.2738	-32.9479	10.5641	120	104	7	14	307.4	15.5833
2738	30	11	137	22	17.3	2291	37.2719	-23.9046	24.2738	-32.9479	10.5641	120	104	7	14	307.4	24.6667
2739	30	11	157	24	15.2	2574	37.2719	-23.9046	24.2738	-32.9479	10.5641	120	104	7	14	337.8	20.6667
2740	30	11	137	30	19.4	2551	36.195	-23.5393	23.0574	-32.7693	10.7191	106	106	8	13	337.8	28.25
2741	30	11	132	26	15	2774	37.2719	-23.9046	24.2738	-32.9479	10.5641	120	104	7	14	337.8	20.6667
2742	30	11	137	20	16.3	2413	37.2719	-23.9046	24.2738	-32.9479	10.5641	120	104	7	14	322.1	15.5833
2743	30	11	137	30	19.4	2397	36.195	-23.5393	23.0574	-32.7693	10.7191	106	106	8	13	337.8	26.75
2744	30	11	137	26	18.4	2269	37.2719	-23.9046	24.2738	-32.9479	10.5641	120	104	7	14	302.1	26.75
2745	30	11	87	18	11.4	2338	37.2719	-23.9046	24.2738	-32.9479	10.5641	120	104	7	14	320.4	15.5833
2746	30	11	137	22	17.3	2639	37.2719	-23.9046	24.2738	-32.9479	10.5641	120	104	7	14	305.5	26.75
2747	30	11	137	22	15.3	2532	36.195	-23.5393	23.0574	-32.7693	10.7191	106	106	8	13	337.8	28.25
2748	30	11	137	24	17.3	2821	37.2719	-23.9046	24.2738	-32.9479	10.5641	120	104	7	14	305.5	26.75
2749	30	11	152	26	15	2834	37.2719	-23.9046	24.2738	-32.9479	10.5641	120	104	7	14	321.5	15.5833
2750	30	11	137	20	16.3	2851	37.2719	-23.9046	24.2738	-32.9479	10.5641	120	104	7	14	297.5	26.75
2751	30	11	137	24	19.4	2587	36.195	-23.5393	23.0574	-32.7693	10.7191	106	106	8	13	332.4	26.75
2752	30	11	137	28	19.4	2981	37.2719	-23.9046	24.2738	-32.9479	10.5641	120	104	7	14	360.2	15.5833
2753	30	11	137	16	14.3	2428	37.2719	-23.9046	24.2738	-32.9479	10.5641	120	104	7	14	321.5	15.5833
2754	30	11	137	24	15.3	2643	31.4693	-22.2997	18.7551	-31.256	10.3697	70	111	9	9	341.9	28.25
2755	30	11	112	24	17	2656	37.2719	-23.9046	24.2738	-32.9479	10.5641	120	104	7	14	297.5	26.75
2756	30	11	137	22	16.3	2784	37.2719	-23.9046	24.2738	-32.9479	10.5641	120	104	7	14	321.5	15.5833
2757	30	11	137	20	16.3	2441	37.2719	-23.9046	24.2738	-32.9479	10.5641	120	104	7	14	320.4	15.5833
2758	30	11	137	22	16.3	2230	37.2719	-23.9046	24.2738	-32.9479	10.5641	120	104	7	14	302.7	26.75
2759	30	11	137	22	17.3	2453	37.2719	-23.9046	24.2738	-32.9479	10.5641	120	104	7	14	330.2	15.5833
2760	30	11	137	22	15.3	2637	33.515	-22.5692	20.8124	-31.4543	10.407	90	107	8	11	305	26.75
2761	30	11	137	16	13.3	2375	33.515	-22.5692	20.8124	-31.4543	10.407	90	107	8	11	330.2	15.5833
2762	30	11	117	20	15.5	2204	33.515	-22.5692	20.8124	-31.4543	10.407	90	107	8	11	305.1	22.1667
2763	30	11	137	24	18.4	2619	33.515	-22.5692	20.8124	-31.4543	10.407	90	107	8	11	292.5	22.1667
2764	30	11	137	22	16.3	2423	33.515	-22.5692	20.8124	-31.4543	10.407	90	107	8	11	330.2	20.5833
2765	30	11	137	28	18.4	2350	31.4693	-22.2997	18.7551	-31.256	10.3697	70	111	9	9	305.1	22.1667
2766	30	11	117	22	22.7	2402	33.515	-22.5692	20.8124	-31.4543	10.407	90	107	8	11	305	22.1667
2767	30	11	137	26	19.4	2498	31.4693	-22.2997	18.7551	-31.256	10.3697	70	111	9	9	341.9	22.1667
2768	30	11	137	26	17.3	2823	31.4693	-22.2997	18.7551	-31.256	10.3697	70	111	9	9	341.9	21.0833
2769	30	11	117	24	18.5	2463	33.515	-22.5692	20.8124	-31.4543	10.407	90	107	8	11	323.2	20.5833
2770	30	11	112	26	16	3424	31.4693	-22.2997	18.7551	-31.256	10.3697	70	111	9	9	359.4	21.0833
2771	30	11	137	28	18.4	2637	33.515	-22.5692	20.8124	-31.4543	10.407	90	107	8	11	331.7	20.5833
2772	30	11	137	24	18.4	2442	33.515	-22.5692	20.8124	-31.4543	10.407	90	107	8	11	305	22.1667
2773	30	11	117	24	18.5	2851	31.4693	-22.2997	18.7551	-31.256	10.3697	70	111	9	9	341.9	21.0833
2774	30	11	137	32	20.4	2790	33.515	-22.5692	20.8124	-31.4543	10.407	90	107	8	11	330.2	20.5833
2775	30	11	137	30	20.4	2455	33.515	-22.5692	20.8124	-31.4543	10.407	90	107	8	11	331.7	20.5833
2776	30	11	117	20	22.7	2811	33.515	-22.5692	20.8124	-31.4543	10.407	90	107	8	11	312.7	22.1667
2777	30	11	117	20	20.6	2813	33.515	-22.5692	20.8124	-31.4543	10.407	90	107	8	11	307.4	22.1667
2778	30	11	117	16	20.6	3456	33.515	-22.5692	20.8124	-31.4543	10.407	90	107	8	11	364.5	17.8333
2779	30	11	152	16	16	3384	33.515	-22.5692	20.8124	-31.4543	10.407	90	107	8	11	402.8	20.5833
2780	30	11	137	26	19.4	3213	33.515	-22.5692	20.8124	-31.4543	10.407	90	107	8	11	329.7	17.8333
2781	30	11	117	16	24.7	2617	33.515	-22.5692	20.8124	-31.4543	10.407	90	107	8	11	312.7	22.1667
2782	30	11	137	32	19.4	2553	31.4693	-22.2997	18.7551	-31.256	10.3697	70	111	9	9	327	21.0833
2783	30	11	152	26	15	2873	33.515	-22.5692	20.8124	-31.4543	10.407	90	107	8	11	354.4	20.5833
2784	30	11	137	26	18.4	2742	31.4693	-22.2997	18.7551	-31.256	10.3697	70	111	9	9	327	21.0833
2785	30	11	137	30	17.3	2398	33.515	-22.5692	20.8124	-31.4543	10.407	90	107	8	11	307.4	22.1667
2786	30	11	137	28	18.4	2539	33.515	-22.5692	20.8124	-31.4543	10.407	90	107	8	11	307.4	22.1667
2787	30	11	137	28	19.4	2827	33.515	-22.5692	20.8124	-31.4543	10.407	90	107	8	11	329.7	22.1667
2788	30	11	137	30	18.4	2328	31.4693	-22.2997	18.7551	-31.256	10.3697	70	111	9	9	327	22.1667
2789	30	11	117	22	17.5	3505	33.515	-22.5692	20.8124	-31.4543	10.407	90	107	8	11	364.5	17.8333
2790	30	11	137	24	16.3	2813	33.515	-22.5692	20.8124	-31.4543	10.407	90	107	8	11	297.9	22.1667
2791	30	11	137	26	16.3	3339	33.515	-22.5692	20.8124	-31.4543	10.407	90	107	8	11	364.5	17.8333
2792	30	11	137	28	17.3	2898	33.515	-22.5692	20.8124	-31.4543	10.407	90	107	8	11	312.7	22.1667
2793	30	11	117	20	16.5	2673	31.4693	-22.2997	18.7551	-31.256	10.3697	70	111	9	9	327	21.0833
2794	30	11	117	16	14.4	2747	31.4693	-22.2997	18.7551	-31.256	10.3697	70	111	9	9	301.6	22.1667
2795	30	11	117	22	20.6	3189	33.515	-22.5692	20.8124	-31.4543	10.407	90	107	8	11	329.7	17.8333
2796	30	11	137	24	17.3	2754	31.4693	-22.2997	18.7551	-31.256	10.3697	70	111	9	9	314.5	21.0833
2797	30	11	137	26	19.4	3207	33.515	-22.5692	20.8124	-31.4543	10.407	90	107	8	11	301.6	22.1667
2798	30	11	117	22	15.5	2949	31.4693	-22.2997	18.7551	-31.256	10.3697	70	111	9	9	344.1	21.0833
2799	30	11	137	26	18.4	3097	31.4693	-22.2997	18.7551	-31.256	10.3697	70	111	9	9	344.1	21.0833
2800	30	11	117	20	22.7	3035	33.515	-22.5692	20.8124	-31.4543	10.407	90	107	8	11	316.3	17.8333
2801	30	11	137	30	18.4	2909	31.4693	-22.2997	18.7551	-31.256	10.3697	70	111	9	9	344.1	21.0833
2802	30	11	137	30	17.3	2921	31.4693	-22.2997	18.7551	-31.256	10.3697	70	111	9	9	301.6	22.1667
2803	30	11	137	28	18.4	2756	31.4693	-22.2997	18.7551	-31.256	10.3697	70	111	9	9	344.1	21.0833
2804	30	11	117	24	22.7	2485	31.4693	-22.2997	18.7551	-31.256	10.3697	70	111	9	9	314.5	21.0833
2805	30	11	137	28	17.3	2440	31.4693	-22.2997	18.7551	-31.256	10.3697	70	111	9	9	314.5	21.0833
2806	30	11	117	22	22.7	3259	31.4693	-22.2997	18.7551	-31.256	10.3697	70	111	9	9	340.9	21.0833
2807	30	11	117	20	22.7	2737	31.4693	-22.2997	18.7551	-31.256	10.3697	70	111	9	9	301.6	22.1667
2808	30	11	117	20	22.7	2877	31.4693	-22.2997	18.7551	-31.256	10.3697	70	111	9	9	318.7	21.0833
2809	30	11	137	26	18.4	3580	31.4693	-22.2997	18.7551	-31.256	10.3697	70	111	9	9	387.6	21.0833
2810	30	11	117	22	22.7	2962	31.4693	-22.2997	18.7551	-31.256	10.3697	70	111	9	9	331	22.1667
2811	30	11	117	16	22.7	2683	31.4693	-22.2997	18.7551	-31.256	10.3697	70	111	9	9	318.7	21.0833
2812	30	11	137	26	18.4	2647	31.4693	-22.2997	18.7551	-31.256	10.3697	70	111	9	9	308.5	21.0833
2813	30	11	137	28	18.4	3277	31.4693	-22.2997	18.7551	-31.256	10.3697	70	111	9	9	357.7	21.0833
2814	30	11	117	24	16.5	3587	31.4693	-22.2997	18.7551	-31.256	10.3697	70	111	9	9	380.3	-9999
2815	30	11	137	24	19.4	2937	31.4693	-22.2997	18.7551	-31.256	10.3697	70	111	9	9	331	22.1667
2816	30	11	137	24	18.4	2884	31.4693	-22.2997	18.7551	-31.256	10.3697	70	111	9	9	340.9	21.0833
2817	30	11	117	20	22.7	3237	31.4693	-22.2997	18.7551	-31.256	10.3697	70	111	9	9	357.7	21.0833
2818	30	11	137	26	17.3	2903	31.4693	-22.2997	18.7551	-31.256	10.3697	70	111	9	9	308.5	22.1667
2819	30	11	117	22	22.7	3281	31.4693	-22.2997	18.7551	-31.256	10.3697	70	111	9	9	357.7	21.0833
2820	30	11	137	26	19.4	2397	35.3745	-22.996	22.6798	-31.6908	10.3741	106	103	7	13	293	21.4167
2821	30	11	137	24	19.4	2078	35.3745	-22.996	22.6798	-31.6908	10.3741	106	103	7	13	272.2	21.4167
2822	30	11	137	24	18.4	2151	35.3745	-22.996	22.6798	-31.6908	10.3741	106	103	7	13	268.5	27.8333
2823	30	11	137	22	15.3	2107	35.3745	-22.996	22.6798	-31.6908	10.3741	106	103	7	13	260.7	27.8333
2824	30	11	137	20	17.3	2798	35.3745	-22.996	22.6798	-31.6908	10.3741	106	103	7	13	293	21.4167
2825	30	11	137	16	13.3	2414	35.3745	-22.996	22.6798	-31.6908	10.3741	106	103	7	13	260.7	27.8333
2826	30	11	137	20	15.3	2598	35.3745	-22.996	22.6798	-31.6908	10.3741	106	103	7	13	312.8	27.8333
2827	30	11	137	20	15.3	2251	35.3745	-22.996	22.6798	-31.6908	10.3741	106	103	7	13	264.2	27.8333
2828	30	11	137	16	15.3	2461	35.3745	-22.996	22.6798	-31.6908	10.3741	106	103	7	13	276.7	27.8333
2829	30	11	137	14	12.2	2321	35.3745	-22.996	22.6798	-31.6908	10.3741	106	103	7	13	276.7	27.8333
2830	30	11	117	16	12.4	3193	35.3745	-22.996	22.6798	-31.6908	10.3741	106	103	7	13	337.9	21.4167
2831	30	11	137	22	15.3	3180	35.3745	-22.996	22.6798	-31.6908	10.3741	106	103	7	13	337.9	21.4167
2832	30	11	137	26	19.4	2529	35.3745	-22.996	22.6798	-31.6908	10.3741	106	103	7	13	276.7	27.8333
2833	30	11	132	26	17	2870	35.3745	-22.996	22.6798	-31.6908	10.3741	106	103	7	13	312.8	27.8333
2834	30	11	132	24	15	2210	35.3745	-22.996	22.6798	-31.6908	10.3741	106	103	7	13	263.6	27.8333
2835	30	11	137	26	16.3	2473	35.3745	-22.996	22.6798	-31.6908	10.3741	106	103	7	13	296.6	21.4167
2836	30	11	137	22	16.3	2976	35.3745	-22.996	22.6798	-31.6908	10.3741	106	103	7	13	312.8	21.4167
2837	30	11	137	24	16.3	2631	35.3745	-22.996	22.6798	-31.6908	10.3741	106	103	7	13	303.3	21.4167
2838	30	11	132	24	14	3467	35.3745	-22.996	22.6798	-31.6908	10.3741	106	103	7	13	337.9	21.4167
2839	30	11	137	28	19.4	2305	35.3745	-22.996	22.6798	-31.6908	10.3741	106	103	7	13	263.6	27.8333
2840	30	11	137	20	14.3	2812	35.3745	-22.996	22.6798	-31.6908	10.3741	106	103	7	13	296.6	21.4167
2841	30	11	137	22	14.3	2589	35.3745	-22.996	22.6798	-31.6908	10.3741	106	103	7	13	342.1	21.4167
2842	30	11	137	30	21.4	2641	35.3745	-22.996	22.6798	-31.6908	10.3741	106	103	7	13	299.2	27.8333
2843	30	11	137	24	17.3	2990	35.3745	-22.996	22.6798	-31.6908	10.3741	106	103	7	13	328.4	27.8333
2844	30	11	137	22	14.3	2927	35.3745	-22.996	22.6798	-31.6908	10.3741	106	103	7	13	351.4	21.4167
2845	30	11	137	20	16.3	3428	35.3745	-22.996	22.6798	-31.6908	10.3741	106	103	7	13	342	21.4167
2846	30	11	137	26	20.4	2481	35.3745	-22.996	22.6798	-31.6908	10.3741	106	103	7	13	266.8	27.8333
2847	30	11	137	16	16.3	3299	35.3745	-22.996	22.6798	-31.6908	10.3741	106	103	7	13	328.4	27.8333
2848	30	11	137	26	18.4	2214	35.3745	-22.996	22.6798	-31.6908	10.3741	106	103	7	13	263.3	27.8333
2849	30	11	137	28	20.4	2570	35.3745	-22.996	22.6798	-31.6908	10.3741	106	103	7	13	296.5	27.8333
2850	30	11	137	24	17.3	3109	35.3745	-22.996	22.6798	-31.6908	10.3741	106	103	7	13	342	21.4167
2851	30	11	137	24	18.4	2331	35.3745	-22.996	22.6798	-31.6908	10.3741	106	103	7	13	281.8	27.8333
2852	30	11	137	22	15.3	2325	35.3745	-22.996	22.6798	-31.6908	10.3741	106	103	7	13	266.5	27.8333
2853	30	11	132	24	16	2380	35.3745	-22.996	22.6798	-31.6908	10.3741	106	103	7	13	266.5	27.8333
2854	30	11	137	22	16.3	2844	35.3745	-22.996	22.6798	-31.6908	10.3741	106	103	7	13	309.9	27.8333
2855	30	11	137	28	21.4	2896	35.3745	-22.996	22.6798	-31.6908	10.3741	106	103	7	13	311.1	27.8333
2856	310	13	57	34	15.3	2395	36.4155	-23.8669	23.6445	-32.4574	10.3828	114	103	6	15	291	25.9167
2857	310	13	57	20	9.8	2376	35.3745	-22.996	22.6798	-31.6908	10.3741	106	103	7	13	277.3	27.8333
2858	310	13	47	34	15.6	2300	36.4155	-23.8669	23.6445	-32.4574	10.3828	114	103	6	15	283.4	21.5
2859	310	13	57	18	7.6	2753	35.3745	-22.996	22.6798	-31.6908	10.3741	106	103	7	13	320.1	27.8333
2860	310	13	57	24	12	2233	35.3745	-22.996	22.6798	-31.6908	10.3741	106	103	7	13	270.5	27.8333
2861	310	13	57	24	14.2	2505	35.3745	-22.996	22.6798	-31.6908	10.3741	106	103	7	13	286.1	27.8333
2862	310	13	57	26	10.9	2154	35.3745	-22.996	22.6798	-31.6908	10.3741	106	103	7	13	263.4	27.8333
2863	310	13	57	26	12	2168	35.3745	-22.996	22.6798	-31.6908	10.3741	106	103	7	13	265.9	27.8333
2864	310	13	57	30	14.2	2624	35.3745	-22.996	22.6798	-31.6908	10.3741	106	103	7	13	306	29.6667
2865	310	13	57	32	15.3	2361	35.3745	-22.996	22.6798	-31.6908	10.3741	106	103	7	13	301.7	32.1667
2866	310	13	57	28	13.1	2396	35.3745	-22.996	22.6798	-31.6908	10.3741	106	103	7	13	293.5	29.6667
2867	310	13	57	26	13.1	2342	35.3745	-22.996	22.6798	-31.6908	10.3741	106	103	7	13	305.2	29.3333
2868	310	13	57	24	12	2728	35.3745	-22.996	22.6798	-31.6908	10.3741	106	103	7	13	321.8	29.3333
2869	310	13	57	22	10.9	2645	35.3745	-22.996	22.6798	-31.6908	10.3741	106	103	7	13	315.4	22.25
2870	310	13	57	28	15.3	2453	35.3745	-22.996	22.6798	-31.6908	10.3741	106	103	7	13	293.4	29.3333
2871	310	13	57	28	14.2	2432	35.3745	-22.996	22.6798	-31.6908	10.3741	106	103	7	13	296.7	29.3333
2872	310	13	57	30	14.2	2554	32.6023	-20.1666	19.9398	-29.1118	10.8334	84	95	7	12	306.4	26.8333
2873	310	13	57	28	14.2	2556	32.6023	-20.1666	19.9398	-29.1118	10.8334	84	95	7	12	307.5	26.8333
2874	310	13	57	28	13.1	2654	32.6023	-20.1666	19.9398	-29.1118	10.8334	84	95	7	12	316.2	26.8333
2875	516	13	15	8	4	405	39.2272	-24.2718	25.1822	-35.1094	11.6608	136	102	7	15	171.8	91
2876	515	13	35	20	15	444	39.2272	-24.2718	25.1822	-35.1094	11.6608	136	102	7	15	171.3	93.5833
2877	515	13	35	20	15	445	39.2272	-24.2718	25.1822	-35.1094	11.6608	136	102	7	15	171.3	93.5833
2878	263	13	55	28	8	411	39.2272	-24.2718	25.1822	-35.1094	11.6608	136	102	7	15	162	90.8333
2879	263	13	45	22	9	408	39.2272	-24.2718	25.1822	-35.1094	11.6608	136	102	7	15	162.1	91
2880	263	13	55	26	9	413	39.2272	-24.2718	25.1822	-35.1094	11.6608	136	102	7	15	161.9	90.8333
2881	263	13	55	26	9	413	39.2272	-24.2718	25.1822	-35.1094	11.6608	136	102	7	15	161.9	90.8333
2882	263	13	55	34	12	428	39.2272	-24.2718	25.1822	-35.1094	11.6608	136	102	7	15	162.9	90.8333
2883	263	13	55	36	10	432	39.2272	-24.2718	25.1822	-35.1094	11.6608	136	102	7	15	166.5	90.8333
2884	263	13	55	26	10	425	39.2272	-24.2718	25.1822	-35.1094	11.6608	136	102	7	15	167.4	91
2885	263	13	45	18	7	463	39.2272	-24.2718	25.1822	-35.1094	11.6608	136	102	7	15	169.8	93.5833
2886	263	13	45	22	9	472	39.2272	-24.2718	25.1822	-35.1094	11.6608	136	102	7	15	166.2	93.5833
2887	263	13	55	22	9	547	39.2272	-24.2718	25.1822	-35.1094	11.6608	136	102	7	15	173.7	91.5
2888	263	13	30	12	7	750	38.6883	-24.1893	25.2281	-34.072	11.1573	130	103	7	15	191	90.4167
2889	263	13	30	10	7	818	38.6883	-24.1893	25.2281	-34.072	11.1573	130	103	7	15	195.8	86.0833
2890	310	13	13	8	7	489	39.2002	-24.3814	25.9438	-33.1758	10.5019	136	101	9	15	188	103.667
2891	310	13	12	10	12	233	41.1216	-26.5146	25.2413	-37.5007	11.4317	143	102	13	16	155.3	110.167
2892	310	13	12	10	12	234	41.1216	-26.5146	25.2413	-37.5007	11.4317	143	102	13	16	155.3	110.167
[truncated: 1,933 more rows]
